# Supplementary material for: Selinexor, daratumumab, bortezomib and dexamethasone for the treatment of patients with relapsed or refractory multiple myeloma: results of the phase II, non-randomized, multicenter GEM-SELIBORDARA study
Source: PubMed Central journal article supplement — Haematologica. 2024 Feb 15;109(7):2219–28. doi: 10.3324/haematol.2023.284089 (PMC11215366; doi:10.3324/haematol.2023.284089), 2024-02-15
Supplement: 2023_284089_GONZALEZ_SUPPL.pdf [file 2023_284089_GONZALEZ_SUPPL.pdf]

# Selinexor, daratumumab, bortezomib and dexamethasone for the treatment of patients with relapsed or refractory multiple myeloma: results of the phase II, non-randomized, multicenter GEM-SELIBORDARA study

Verónica González-Calle,<sup>1\*</sup> Paula Rodríguez-Otero,<sup>2\*</sup> Anna Sureda,<sup>3</sup> Felipe de Arriba,<sup>4</sup> Marta Reinoso,<sup>5</sup> Paz Ribas,<sup>6</sup> Ana Pilar González-Rodríguez,<sup>7</sup> Yolanda González,<sup>8</sup> Albert Oriol,<sup>9</sup> Joaquín Martínez-López,<sup>10</sup> Marta Sonia González,<sup>11</sup> Miguel T. Hernández,<sup>12</sup> Maialen Sirvent,<sup>13</sup> Teresa Cedena,<sup>10</sup> Noemí Puig,<sup>1</sup> Bruno Paiva,<sup>2</sup> Joan Bladé,<sup>14</sup> Juan José Lahuerta,<sup>10</sup> Jesús F. San-Miguel<sup>2</sup> and María-Victoria Mateos<sup>1</sup>

<sup>1</sup>Department of Hematology, University Hospital of Salamanca, CAUSA, IBSAL and Center for Biomedical Research in Network of Cancer, CIBERONC, Salamanca; <sup>2</sup>Cancer Center Clínica Universidad de Navarra, CIMA, IDISNA, CIBERONC, Pamplona; <sup>3</sup>Serve d'Hematologia Clínica, Institut Català D'Oncologia-L'Hospitalet. IDIBELL, Universitat de Barcelona, Barcelona; <sup>4</sup>Hospital Morales Meseguer, IMIB-Pascual Parrilla, Universidad de Murcia, Murcia; <sup>5</sup>Hospital Universitario Virgen del Rocío, Sevilla; <sup>6</sup>Hospital Universitario Dr. Peset, Valencia; <sup>7</sup>Hospital Universitario Central de Asturias, Oviedo; <sup>8</sup>Institut Català D'Oncologia Girona, Girona; <sup>9</sup>Institut Català D'Oncologia Badalona, Badalona; <sup>10</sup>Hospital Universitario 12 de Octubre, Madrid; <sup>11</sup>Complejo Hospitalario Universitario de Santiago, La Coruña; <sup>12</sup>Hospital Universitario de Canarias, Tenerife; <sup>13</sup>Hospital Donostia, San Sebastián and <sup>14</sup>Hospital Clinic i Provincial de Barcelona, IDIBAPS, Barcelona, Spain

*\*VG-C and PR-O contributed equally as first authors.*

**Correspondence:** P. Rodríguez-Otero  
[paurodriguez@unav.es](mailto:paurodriguez@unav.es)

**Received:** September 20, 2023.

**Accepted:** February 2, 2024.

**Early view:** February 15, 2024.

<https://doi.org/10.3324/haematol.2023.284089>

©2024 Ferrata Storti Foundation

Published under a CC BY-NC license

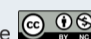

## **Supplementary material**

### **Index\_**

1. Supplementary methods – Page 2
2. Protocol version 4.0 GEM-Selibordara. – Page 4

## **1. Supplementary methods**

### **Study endpoints:**

The primary endpoint of the trial was to evaluate the efficacy of the combination S-DVd in terms of complete response rate (CR) or better, including stringent complete responses (sCR) and complete responses (CR), according to the criteria of the International Myeloma Working Group (IMWG)<sup>13</sup>. A bone marrow aspiration was performed when CR was suspected to confirm it and to measure the minimal residual disease (MRD) by next generation flow (NGF) in Pethema central laboratories following the same IMWG criteria <sup>14</sup>.

Secondary endpoints included overall rate response (ORR), defined as achieving PR or better; duration of response (DOR); progression free survival (PFS) defined as the time from the randomization until the disease progression or death to any cause, whichever occurred first; overall survival (OS), defined as the time from the randomization until dead to any cause; and the incidence and grade of adverse events (AEs) and discontinuation of treatment in both groups. AEs were graded according to the National Cancer Institute Common Terminology Criteria for Adverse Events (CTCAE v.4.03) and safety population included all patients who received at least one dose of the drug study treatment.

Cytogenetic risk status was assessed by fluorescence *in-situ* hybridization (FISH) in Pethema central laboratories within two weeks prior to first study treatment dose <sup>15,16</sup>. Patients were defined as a high-risk using the IMWG criteria <sup>17</sup>.

### **Statistical analysis**

The chi-squared, Student's t or Welch's t-test, and Mann–Whitney U-tests were applied to estimate the statistical significance of group differences. The distribution of PFS and OS were estimated using the Kaplan-Meier test. The differences between survival were defined between both arms using a long-rank test and the corresponding hazard ratio (HR) and 95% confidence interval (CI) were estimated using the Cox regression model. Values of  $P < 0.05$  were considered significant. Statistical analysis was performed with the SPSS version 24 program.

## **2. Protocol version 4.0 GEM-SELIBORDARA (Spanish)**

|                                                                                                                                                                                                                                                              |                                                                                                                                                 |
|--------------------------------------------------------------------------------------------------------------------------------------------------------------------------------------------------------------------------------------------------------------|-------------------------------------------------------------------------------------------------------------------------------------------------|
| <b>Protocolo de estudio clínico</b>                                                                                                                                                                                                                          |                                                                                                                                                 |
| "Ensayo abierto, multicéntrico, de fase 2 de selinexor (KPT-330), bortezomib y dosis baja de dexametasona más daratumumab (SELIBORDARA) para el tratamiento de pacientes con mieloma múltiple en recaída y/o refractario"                                    |                                                                                                                                                 |
| Nombre del estudio: SELIBORDARA: Selinexor, Bortezomib y Daratumumab en mieloma múltiple                                                                                                                                                                     |                                                                                                                                                 |
| Fase de desarrollo del fármaco                                                                                                                                                                                                                               | Fase 2                                                                                                                                          |
| Producto en investigación:                                                                                                                                                                                                                                   | Selinexor<br>Daratumumab<br>Bortezomib                                                                                                          |
| Indicación:                                                                                                                                                                                                                                                  | Mieloma múltiple refractario o en recaída y refractario                                                                                         |
| Promotor:                                                                                                                                                                                                                                                    | Fundación PETHEMA (Programa Español de Tratamientos en Hematología)                                                                             |
| Suministrador de Selinexor/Fuente financiadora parcial:                                                                                                                                                                                                      | Karyopharm Therapeutics, INC.<br>85 Wells Avenue<br>Newton, MA 02459, EE.UU.                                                                    |
| Suministrador de Daratumumab y Bortezomib/Fuente financiadora parcial:                                                                                                                                                                                       | Janssen Cilag<br>Turnhoutseweg, 30<br>22340, Beerse. Belgium                                                                                    |
| Fecha del protocolo y versión:                                                                                                                                                                                                                               | <b>4.0 de 23 de febrero de 2021</b>                                                                                                             |
| Número Eudra CT:                                                                                                                                                                                                                                             | 2017-002326-21                                                                                                                                  |
| Coordinadores clínicos                                                                                                                                                                                                                                       | Dr. J.F. San Miguel<br>Clínica Universidad de Navarra, Pamplona<br>Dra. María Victoria Mateos<br>Hospital Universitario de Salamanca, Salamanca |
| Actuación: De acuerdo con los principios éticos derivados de la Declaración de Helsinki, que coinciden con las pautas de la Conferencia Internacional de Armonización (ICH) sobre Buenas Prácticas Clínicas (BPC) y, donde proceda, requisitos regulatorios. |                                                                                                                                                 |

INFORMACIÓN CONFIDENCIAL

Este documento pertenece exclusivamente a GEM/PETHEMA. Este documento y cualquier parte, o toda la información que contiene, debe considerarse y tratarse como estrictamente confidencial. En términos de divulgación, este documento se empleará únicamente con el propósito que en él se especifica.

PÁGINA DE FIRMAS DE ACEPTACIÓN DEL PROTOCOLO

PROMOTOR: PETHEMA

CÓDIGO DEL PROTOCOLO: GEM-SELIBORDARA

VERSIÓN: 4.0 DE 23 DE FEBRERO DE 2021

He leído y entiendo el contenido de este protocolo clínico, y estoy de acuerdo en llevar a cabo este estudio según todas las disposiciones del protocolo, tal y como se detalla en todas las normas y pautas de aplicación. Además, dirigiré el estudio de acuerdo con la actual versión de Buenas Prácticas Clínicas, ICH E6, y con los requisitos normativos de aplicación de la FDA, e informaré al investigador principal, y al resto de investigadores, acerca de toda la información relevante que emerja durante la realización de este estudio.

Dr. Juan José Lahuerta Palacios

(Representante de PETHEMA)

\_\_\_\_\_

Firma

\_\_\_\_\_

Fecha

Dr. Jesús San Miguel

(Coordinador clínico)

\_\_\_\_\_

Firma

\_\_\_\_\_

Fecha

Dra. María Victoria Mateos

(Coordinadora clínica)

\_\_\_\_\_

Firma

\_\_\_\_\_

Fecha

PÁGINA DE FIRMAS DE ACEPTACIÓN DEL PROTOCOLO

PROMOTOR: PETHEMA

CÓDIGO DEL PROTOCOLO: GEM-SELIBORDARA

VERSIÓN: 4.0 DE 23 DE FEBRERO DE 2021

He leído y entiendo el contenido de este protocolo clínico, y estoy de acuerdo en llevar a cabo este estudio según todas las disposiciones del protocolo, tal y como se detalla en todas las normas y pautas de aplicación. Además, dirigiré el estudio de acuerdo con la actual versión de Buenas Prácticas Clínicas, ICH E6, y con los requisitos normativos de aplicación de la FDA, e informaré al investigador principal, y al resto de investigadores, acerca de toda la información relevante que emerja durante la realización de este estudio.

|                               |       |       |
|-------------------------------|-------|-------|
| .....                         | _____ | _____ |
| Nombre Investigador principal | Firma | Fecha |
| .....                         | _____ | _____ |
| Nombre Co-investigador        | Firma | Fecha |
| .....                         | _____ | _____ |
| Nombre Co-investigador        | Firma | Fecha |
| .....                         | _____ | _____ |
| Nombre Co-investigador        | Firma | Fecha |

## RESUMEN DEL PROTOCOLO

| Promotor:<br>PETHEMA                                                                                                                                                                                                                                                                                                                                                                                                                                                                                                                                                                                                                                                                                                                                                                                                                                                                                                                                                                                                                                                                                                                                                                                                                                                                                                                                                                                                                                                                                                                                                                                                  | Productos en investigación:<br>Selinexor(KPT-330)/<br>Daratumumab/Bortezomib | Fase de desarrollo:<br>Fase 2 |
|-----------------------------------------------------------------------------------------------------------------------------------------------------------------------------------------------------------------------------------------------------------------------------------------------------------------------------------------------------------------------------------------------------------------------------------------------------------------------------------------------------------------------------------------------------------------------------------------------------------------------------------------------------------------------------------------------------------------------------------------------------------------------------------------------------------------------------------------------------------------------------------------------------------------------------------------------------------------------------------------------------------------------------------------------------------------------------------------------------------------------------------------------------------------------------------------------------------------------------------------------------------------------------------------------------------------------------------------------------------------------------------------------------------------------------------------------------------------------------------------------------------------------------------------------------------------------------------------------------------------------|------------------------------------------------------------------------------|-------------------------------|
| Título del estudio:<br>"Ensayo abierto, multicéntrico, de fase 2 de selinexor (KPT-330), bortezomib y dosis baja de dexametasona más daratumumab (SELIBORDARA) para el tratamiento de pacientes con mieloma múltiple en recaída y/o refractario"                                                                                                                                                                                                                                                                                                                                                                                                                                                                                                                                                                                                                                                                                                                                                                                                                                                                                                                                                                                                                                                                                                                                                                                                                                                                                                                                                                      |                                                                              |                               |
| Fecha del protocolo y versión: 4.0 DE 23 DE FEBRERO DE 2021                                                                                                                                                                                                                                                                                                                                                                                                                                                                                                                                                                                                                                                                                                                                                                                                                                                                                                                                                                                                                                                                                                                                                                                                                                                                                                                                                                                                                                                                                                                                                           |                                                                              |                               |
| Código del protocolo: GEM-SELIBORDARA                                                                                                                                                                                                                                                                                                                                                                                                                                                                                                                                                                                                                                                                                                                                                                                                                                                                                                                                                                                                                                                                                                                                                                                                                                                                                                                                                                                                                                                                                                                                                                                 |                                                                              |                               |
| Indicación: Mieloma múltiple refractario o en recaída y refractario                                                                                                                                                                                                                                                                                                                                                                                                                                                                                                                                                                                                                                                                                                                                                                                                                                                                                                                                                                                                                                                                                                                                                                                                                                                                                                                                                                                                                                                                                                                                                   |                                                                              |                               |
| Objetivos:<br><u>Objetivo principal:</u> <ul style="list-style-type: none"><li>El objetivo principal del ensayo es evaluar la eficacia de la combinación de selinexor, bortezomib más dexametasona y daratumumab (SDVd), en términos de tasa de <math>\geq</math> respuestas completas (RC), incluyendo respuestas completas estrictas (RCe) y respuestas completas (RC), de acuerdo con los criterios del International Myeloma Working Group (IMWG).</li></ul> <u>Objetivos secundarios:</u> <ul style="list-style-type: none"><li>Evaluar la eficacia del tratamiento en términos de tasa de respuesta global (TRG), de acuerdo con los criterios del International Myeloma Working Group (IMWG), incluidas las diferentes categorías de respuestas y la tasa de enfermedad mínima residual negativa (EMR-).</li><li>Evaluar la seguridad y tolerabilidad de la combinación, de acuerdo con la incidencia de toxicidades clínicas y de laboratorio.<br/>Evaluar la supervivencia libre de progresión (SLP), supervivencia global (SG), tiempo hasta la progresión (TTP) y duración de la respuesta (DR).</li></ul> <u>Estudios correlacionales:</u> <p>Evaluar la respuesta, así como SLP y SG en función de: Marcadores pronóstico obtenidos vía hibridación <i>in situ</i> fluorescente (FISH), incluyendo del17p, t(4;14), t(14;16), 1q+, 1p-, evaluando, de ser posible, si estos marcadores pronóstico estaban presentes al diagnóstico o se adquirieron, como nuevos, en el momento de la progresión de la enfermedad (PE).</p> <ul style="list-style-type: none"><li>Profundidad de la respuesta.</li></ul> |                                                                              |                               |
| Antecedentes y justificación del estudio                                                                                                                                                                                                                                                                                                                                                                                                                                                                                                                                                                                                                                                                                                                                                                                                                                                                                                                                                                                                                                                                                                                                                                                                                                                                                                                                                                                                                                                                                                                                                                              |                                                                              |                               |

| Promotor:<br>PETHEMA                                                                                                                                                                                                                                                                                                                                                                                                                                                                                                                                                                                                                                                                                                                                                                                                                                                                                                                                                                                                                                                                                                                                                                                                                                                                                                                                                                                                                                                                                                                                                                                                                                                                                                                                                                                                                                                                                                                                                                                                                                                                                                                                                                                                                                                                                                                                                                                                                                                                                                                                                                                                                                                                                                                                                          | Productos en investigación:<br>Selinexor(KPT-330)/<br>Daratumumab/Bortezomib | Fase de desarrollo:<br>Fase 2 |
|-------------------------------------------------------------------------------------------------------------------------------------------------------------------------------------------------------------------------------------------------------------------------------------------------------------------------------------------------------------------------------------------------------------------------------------------------------------------------------------------------------------------------------------------------------------------------------------------------------------------------------------------------------------------------------------------------------------------------------------------------------------------------------------------------------------------------------------------------------------------------------------------------------------------------------------------------------------------------------------------------------------------------------------------------------------------------------------------------------------------------------------------------------------------------------------------------------------------------------------------------------------------------------------------------------------------------------------------------------------------------------------------------------------------------------------------------------------------------------------------------------------------------------------------------------------------------------------------------------------------------------------------------------------------------------------------------------------------------------------------------------------------------------------------------------------------------------------------------------------------------------------------------------------------------------------------------------------------------------------------------------------------------------------------------------------------------------------------------------------------------------------------------------------------------------------------------------------------------------------------------------------------------------------------------------------------------------------------------------------------------------------------------------------------------------------------------------------------------------------------------------------------------------------------------------------------------------------------------------------------------------------------------------------------------------------------------------------------------------------------------------------------------------|------------------------------------------------------------------------------|-------------------------------|
| <p>El mieloma múltiple es el segundo cáncer hematológico más común (tras el linfoma no-Hodgkin), representando el 1% de todos los cánceres y el 2% de todas las muertes por cáncer. A pesar del incremento de la eficacia de los fármacos de primera línea, casi todos los pacientes finalmente recaerán y su enfermedad se transformará en resistente al tratamiento, por lo que existe una necesidad médica no satisfecha, de terapias que puedan mejorar la tasa de SG en estos pacientes refractarios o en recaída y refractarios.</p> <p>Selinexor es un compuesto inhibidor selectivo de la exportación nuclear (SINE™) que bloquea específicamente a la exportina 1 (XPO1) y puede suministrarse por vía oral (v.o.). Selinexor y otros SINE™, administrados tanto como fármacos únicos como en combinación con dexametasona, han demostrado poseer actividad anti-MM en estudios preclínicos y en un estudio clínico de fase 1, con resultados ya publicados. En estudios preclínicos se observó que selinexor y dexametasona (Sel-Dex) en combinación, poseían un efecto sinérgico sobre la viabilidad de las células MM1.S del MM humano en comparación con el efecto de cada producto administrado como fármaco único (Chen <i>et al</i>, presentado en 19º Congreso Anual de EHA 2014, Milan [1]). El incremento de la localización nuclear del receptor de glucocorticoides (RG), y de la concomitantemente activada transcripción de RG, parece ser, al menos en parte, responsable de la citotoxicidad sinérgica de la combinación selinexor-dexametasona en las células MM. La actividad aumentada de la combinación selinexor-dexametasona se observó también en dos modelos de xenoinjerto de MM humano.</p> <p>En estudios realizados por Karyopharm (KCP-330-001 y KCP-330-012), se ha expuesto a 160 pacientes con MM a selinexor ± dexametasona:</p> <ul style="list-style-type: none"><li>• Los resultados preliminares del estudio de fase 1 KCP-330-001 sugieren que selinexor ± dexametasona a baja dosis (20 mg una vez a la semana) poseen clara actividad anti-MM en pacientes muy pretratados.</li><li>• Los resultados del ensayo fase 2 (STORM) han sido recientemente publicados. Selinexor a dosis de 80 mg y dexametasona a dosis de 20 mg, ambos orales y administrados dos veces por semana a pacientes con MM refractarios a bortezomib, carfilzomib, lenalidomida y pomalidomida (cuádruple refractarios) incluyendo un subgrupo de pacientes también refractarios a daratumumab (penta refractarios). La tasa global de respuestas observada fue del 21%, similar en el grupo cuádruple (21%) y penta refractarios (20%). La mediana de duración de la respuesta fue de 5 meses, y un 65% de los pacientes que respondieron</li></ul> |                                                                              |                               |

| Promotor:<br>PETHEMA                                                                                                                                                                                                                                                                                                                                                                                                                                                                                                                                                                                                                                                                                                                                                                                                                                                                                                                                                                                                                                                                                                                                                                                                                                                                                                                                                                                                                                                                                                                                                                                                                                                                                                                                                                                                                                                                                                                                                                                                                                                                                                                                                                                                                                                                                                                                                                                                                                                                                                                                                                                                                                                                                           | Productos en investigación:<br>Selinexor(KPT-330)/<br>Daratumumab/Bortezomib | Fase de desarrollo:<br>Fase 2 |
|----------------------------------------------------------------------------------------------------------------------------------------------------------------------------------------------------------------------------------------------------------------------------------------------------------------------------------------------------------------------------------------------------------------------------------------------------------------------------------------------------------------------------------------------------------------------------------------------------------------------------------------------------------------------------------------------------------------------------------------------------------------------------------------------------------------------------------------------------------------------------------------------------------------------------------------------------------------------------------------------------------------------------------------------------------------------------------------------------------------------------------------------------------------------------------------------------------------------------------------------------------------------------------------------------------------------------------------------------------------------------------------------------------------------------------------------------------------------------------------------------------------------------------------------------------------------------------------------------------------------------------------------------------------------------------------------------------------------------------------------------------------------------------------------------------------------------------------------------------------------------------------------------------------------------------------------------------------------------------------------------------------------------------------------------------------------------------------------------------------------------------------------------------------------------------------------------------------------------------------------------------------------------------------------------------------------------------------------------------------------------------------------------------------------------------------------------------------------------------------------------------------------------------------------------------------------------------------------------------------------------------------------------------------------------------------------------------------|------------------------------------------------------------------------------|-------------------------------|
| <p>permanecían vivos al año. La toxicidad más frecuentemente reportada fue trombopenia (59%), anemia (28%), neutropenia (23%), hiponatremia (22%), leucopenia (15%) y fatiga (15%) (Vogl et al. JCO 2018).</p> <ul style="list-style-type: none"> <li>El estudio KCP-330-017 (STOMP) es un ensayo fase 1b/2, de selinexor y dexametasona a dosis baja en combinación con múltiples tratamientos principales, incluyendo bortezomib [selinexor+bortezomib+dexametasona (SVd)]. Los resultados de esta combinación han sido recientemente publicados (Bahlis N et al. Blood 2018) y el objetivo primario fue evaluar la dosis recomendada de selinexor en combinación con bortezomib a dosis bajas y dexametasona a dosis bajas para ser usada en los siguientes ensayos y se se llegó a la siguiente conclusión: selinexor a dosis de 100 mg una vez por semana, bortezomib a dosis de 1.3 mg/m<sup>2</sup> subcutáneo una vez por semana durante 4 semanas y dexametasona a dosis de 40 mg semanales. Los ciclos deben ser de 35 días. En este ensayo se incluyeron 42 pacientes que habían recibido una mediana de 3 líneas previas de tratamiento y el 50% eran refractarios al inhibidor de proteasoma. La tasa global de respuestas fue del 63%, siendo del 84% para los no refractarios al inhibidor de proteasoma y 43% para los refractarios al inhibidor de proteasoma. La mediana de SLP fue de 9 meses, siendo de 17,8 meses para los no refractarios al inhibidor de proteasoma y 6,1 meses para los refractarios. Del perfil de toxicidad destacan los siguientes efectos adversos G3-4 relacionados con el tratamiento: d trombopenia reportada en el 45% de los pacientes, neutropenia en el 24%, fatiga en el 14% y anemia en el 12%. La incidencia de neuropatía periférica fue baja. <p>Además, a la luz de estos resultados, Karyopharm ha completado ya el reclutamiento de un estudio aleatorizado fase 3 (BOSTON) de SVd <i>versus</i> Vd en pacientes con MM R/R que han recibido previamente entre 1 y 3 regímenes anti-MM. El estudio incorpora la adición de bortezomib una vez a la semana en el brazo SVd, y también permite a los pacientes del brazo control Vd, pasar al grupo SVd cuando experimenten progresión de modo objetivo (según los criterios del IMWG).</p> <p>Recientemente, y en base a resultados preliminares, selinexor ha obtenido la autorización por parte de la FDA (julio 2019) para el tratamiento, en combinación con dexametasona, de pacientes adultos con mieloma múltiple en recaída/refractario (RRMM) que han recibido al menos cuatro terapias previas y cuya enfermedad es resistente a otras formas de tratamiento, incluyendo al</p> </li></ul> |                                                                              |                               |

| Promotor:<br>PETHEMA                                                                                                                                                                                                                                                                                                                                                                                                                                                                                                                                                                                                                                                                                                                                                                                                                                                                                                                                                                                                                                                                                                                                                                                                                                                                                                                                                                                                                                                                                                                                                                                                                                                                                                                                                                                                                                                                                                                                                                                                                                                                                                                                                                                                                                                                                                                                                                                                                                                                                                                                                               | Productos en investigación:<br>Selinexor(KPT-330)/<br>Daratumumab/Bortezomib | Fase de desarrollo:<br>Fase 2 |
|------------------------------------------------------------------------------------------------------------------------------------------------------------------------------------------------------------------------------------------------------------------------------------------------------------------------------------------------------------------------------------------------------------------------------------------------------------------------------------------------------------------------------------------------------------------------------------------------------------------------------------------------------------------------------------------------------------------------------------------------------------------------------------------------------------------------------------------------------------------------------------------------------------------------------------------------------------------------------------------------------------------------------------------------------------------------------------------------------------------------------------------------------------------------------------------------------------------------------------------------------------------------------------------------------------------------------------------------------------------------------------------------------------------------------------------------------------------------------------------------------------------------------------------------------------------------------------------------------------------------------------------------------------------------------------------------------------------------------------------------------------------------------------------------------------------------------------------------------------------------------------------------------------------------------------------------------------------------------------------------------------------------------------------------------------------------------------------------------------------------------------------------------------------------------------------------------------------------------------------------------------------------------------------------------------------------------------------------------------------------------------------------------------------------------------------------------------------------------------------------------------------------------------------------------------------------------------|------------------------------------------------------------------------------|-------------------------------|
| <p>menos dos inhibidores de proteasoma, dos agentes inmunomoduladores y un anticuerpo monoclonal anti-CD38.</p> <p>Daratumumab (Dara) es un AcMo IgG1k humano que se une con alta afinidad a un epítipo concreto de CD38. Según los datos preclínicos, daratumumab induce la muerte de las células tumorales mediada por el sistema inmune: a través de citotoxicidad dependiente del complemento (CDC), citotoxicidad celular dependiente de anticuerpos (CCDA) y fagocitosis celular dependiente de anticuerpos (FCDA).</p> <p>Daratumumab se ha aprobado en la UE y en los EE.UU. para el tratamiento de pacientes con mieloma tras al menos un tratamiento previo, a raíz de los resultados del fármaco en un estudio de Fase 2 como agente único (TRG 29%) (Lonial <i>et al</i>, Lancet 2016; 387:1551-1560 [63]) y en dos estudios aleatorizados de Fase 3 [Dara-Vd vs. Vd y Dara-Rd vs. Rd] (Palumbo <i>et al</i>, N Engl J Med 2016; 375:754-76 [64]) (Dimopoulos <i>et al</i>, N Engl J Med 2016; 375:1319-31 [65]).</p> <p>De todos los estudios realizados con Daratumumab, merece destacar en esta introducción el ensayo fase 3 CASTOR en que Vd fue comparado con DaraVd en una serie de 498 pacientes con MM en recaída y/o refractarios tras haber recibido al menos una línea previa de tratamiento.</p> <p>La tasa global de respuestas para DaraVd fue del 85% con un 30% de <math>\geq</math>RC; además un 14% de pacientes alcanzaron enfermedad mínima residual negativa. La mediana de SLP en la población global fue de 16,7 meses y no se permitió la inclusión de pacientes refractarios a inhibidor de proteasoma, aunque sí expuestos a ellos y en esta población, la SLP fue de 12,4 meses. [66]</p> <p>En todos los estudios, el perfil de toxicidad de daratumumab fue manejable y aceptable, asociado principalmente con reacciones a la infusión de la primera o segunda dosis, y habitualmente de grade leve. No existen toxicidades superpuestas reseñables entre daratumumab y selinexor, y ambos regímenes, DVd y SVd, generalmente se toleran bien.</p> <p>Basándonos en estos antecedentes, fundamentalmente en los resultados del ensayo CASTOR junto con los datos preliminares del estudio STORM en la rama de pacientes tratados con selinexor, bortezomib y dexametasona, proponemos este ensayo fase 2 para evaluar el beneficio de combinar SVd junto con daratumumab, ya que cada uno de los fármacos “nuevos” por separado, selinexor y daratumumab, han demostrado ser eficaces en combinación con bortezomib y dexametasona.</p> |                                                                              |                               |
| Metodología:                                                                                                                                                                                                                                                                                                                                                                                                                                                                                                                                                                                                                                                                                                                                                                                                                                                                                                                                                                                                                                                                                                                                                                                                                                                                                                                                                                                                                                                                                                                                                                                                                                                                                                                                                                                                                                                                                                                                                                                                                                                                                                                                                                                                                                                                                                                                                                                                                                                                                                                                                                       |                                                                              |                               |

| Promotor:<br>PETHEMA                                                                                                                                                                                                                                                                                                                                                                                                                                                                                                                                                                                                                                                                                                                                                                                                                                                                                                                                                                                                                                                                                                                                                                                                                                                              | Productos en investigación:<br>Selinexor(KPT-330)/<br>Daratumumab/Bortezomib | Fase de desarrollo:<br>Fase 2 |
|-----------------------------------------------------------------------------------------------------------------------------------------------------------------------------------------------------------------------------------------------------------------------------------------------------------------------------------------------------------------------------------------------------------------------------------------------------------------------------------------------------------------------------------------------------------------------------------------------------------------------------------------------------------------------------------------------------------------------------------------------------------------------------------------------------------------------------------------------------------------------------------------------------------------------------------------------------------------------------------------------------------------------------------------------------------------------------------------------------------------------------------------------------------------------------------------------------------------------------------------------------------------------------------|------------------------------------------------------------------------------|-------------------------------|
| <p>Este es un estudio de fase 2, abierto, multicéntrico y no aleatorizado, para evaluar la eficacia y la seguridad de la combinación SDVd en un total de 57 pacientes con MM refractario o R/R que hayan recibido al menos 1 línea de tratamiento previo. El tratamiento se mantendrá hasta la PE o toxicidad inaceptable. Este ensayo se llevará a cabo en aproximadamente 15 centros de España.</p>                                                                                                                                                                                                                                                                                                                                                                                                                                                                                                                                                                                                                                                                                                                                                                                                                                                                             |                                                                              |                               |
| <p>Diagnóstico y principales criterios de inclusión:</p> <p>Pacientes masculinos y femeninos <math>\geq 18</math> años, con MM en recaída, y con enfermedad medible siguiendo los criterios del <i>International Myeloma Working Group</i> (IMWG). Los pacientes tienen que haber recibido al menos una línea previa de tratamiento, alcanzado al menos respuesta parcial en alguna de ellas. El tratamiento previo con inhibidores de proteasoma está permitido.</p>                                                                                                                                                                                                                                                                                                                                                                                                                                                                                                                                                                                                                                                                                                                                                                                                             |                                                                              |                               |
| <p>Producto en estudio, dosis y modo de administración:</p> <p>Se administrará selinexor por vía oral, a una dosis fija de 60 mg a la semana en cada una las 5 semanas del ciclo, más 40 o 20 mg de dexametasona oral con cada dosis de selinexor, en combinación con daratumumab a una dosis semanal de 1800 mg por vía subcutánea (s.c.) los días 1, 8, 15 y 22 durante los dos primeros ciclos; los días 1 y 15 (Q2W) del ciclo 3 al 6; y el día 1 (Q5W) en lo sucesivo. Bortezomib se administrará por vía s.c. a una dosis de 1,3 mg/m<sup>2</sup> los días 1, 8, 15 y 22 a partir del primer ciclo, y los días 1 y 15 (Q2W) a partir del ciclo 9. Cada ciclo tiene una duración de 5 semanas, siendo la semana 5 de cada ciclo semana sin tratamiento de estudio.</p> <p>La dosis de dexametasona es 20 mg (v.o.) los días en que también se administra daratumumab (como medicación previa a la inyección), más otros 20 mg (v.o.) el día posterior, y la dosis de dexametasona es de 40 mg (v.o.) los días en los que no se administra daratumumab. Este ajuste se ha hecho con el propósito de mantener a todos los pacientes recibiendo una dosis total de dexametasona de 40 mg semanales.</p> <p>El tratamiento se mantendrá hasta la PE o toxicidad inaceptable.</p> |                                                                              |                               |
| <p>Medicación concomitante:</p> <p>Para minimizar las náuseas, a menos que esté contraindicado, todos los pacientes tienen que recibir antagonistas 5-HT<sub>3</sub> (p.ej., 8 mg de ondansetrón o equivalente), comenzando el Día 1 previo a la primera dosis de selinexor, y continuando 2 o 3 veces por día, o según se necesite. Si se considera necesario, se pueden suministrar otros fármacos antieméticos y anti-anoréxicos. Los pacientes también recibirán, según sus necesidades, terapia para mitigar los efectos secundarios de selinexor y daratumumab, así como los mejores cuidados de soporte (MCS),</p>                                                                                                                                                                                                                                                                                                                                                                                                                                                                                                                                                                                                                                                         |                                                                              |                               |

| <b>Promotor:<br/>PETHEMA</b>                                                                                                                                                                                                                                                                                                                                                                                                                                                                                                                                                                                                                                                                                                                                                                                                                                                                                                                                                                                                                                                                                                                                                                                                                                                                                                                                                                                                                                                                                                                                                                                                                                                                                                                                                                                                                                                                    | <b>Productos en investigación:<br/>Selinexor(KPT-330)/<br/>Daratumumab/Bortezomib</b> | <b>Fase de desarrollo:<br/>Fase 2</b> |
|-------------------------------------------------------------------------------------------------------------------------------------------------------------------------------------------------------------------------------------------------------------------------------------------------------------------------------------------------------------------------------------------------------------------------------------------------------------------------------------------------------------------------------------------------------------------------------------------------------------------------------------------------------------------------------------------------------------------------------------------------------------------------------------------------------------------------------------------------------------------------------------------------------------------------------------------------------------------------------------------------------------------------------------------------------------------------------------------------------------------------------------------------------------------------------------------------------------------------------------------------------------------------------------------------------------------------------------------------------------------------------------------------------------------------------------------------------------------------------------------------------------------------------------------------------------------------------------------------------------------------------------------------------------------------------------------------------------------------------------------------------------------------------------------------------------------------------------------------------------------------------------------------|---------------------------------------------------------------------------------------|---------------------------------------|
| <p>incluyendo transfusiones de productos sanguíneos, agentes antibacterianos y (si procede) factores de crecimiento, incluyendo factores estimuladores de colonias de granulocitos para la neutropenia, y eritropoyetinas para la anemia.</p> <p>Las medicaciones previas y posteriores a la dosis de daratumumab se administrarán según se describe en la sección 8.1.3. Pautas para la Prevención y el Manejo de las Reacciones a la inyección. Los días de administración de daratumumab, los sujetos recibirán los siguientes fármacos 1 hora antes de la inyección: paracetamol (acetaminofén) 650-1.000 mg por v.o.; un antihistamínico (difenhidramina 25-50 mg, o equivalente); y metilprednisolona 100 mg i.v. (no sería necesario en caso de administrar la dosis de 20 mg de dexametasona por vía oral antes de la infusión de daratumumab, a modo de pre-medicación). Todos los pacientes deben recibir 20 mg de dexametasona por v.o. el día posterior a la administración de daratumumab, para prevenir reacciones tardías asociadas a la inyección.</p> <p>Los pacientes pueden continuar recibiendo su medicación/medicaciones de base. Los pacientes recibirán las medicaciones concomitantes que sean necesarias como terapia habitual para tratar síntomas, eventos adversos (EAs) y enfermedades intercurrentes. Se permite el empleo de fármacos para tratar enfermedades concomitantes como la diabetes, hipertensión, etc. Los pacientes pueden recibir transfusiones de hematíes o plaquetas, si están clínicamente indicadas, según las pautas de la institución.</p> <p>Se permite la terapia concurrente con factores de crecimiento tal como se especifica aquí. No se permite la terapia concurrente con cualquier otro tratamiento antitumoral aprobado o en investigación. Durante el estudio tampoco se deben usar otros fármacos en fase de investigación.</p> |                                                                                       |                                       |
| <p><b>Duración del estudio:</b></p> <p>El periodo de reclutamiento para este estudio se espera que dure aproximadamente 18 meses. La duración estimada del tratamiento de cada paciente es de 20 meses (aunque no se contempla una duración máxima), más un periodo de seguimiento de 24 meses. La duración total estimada del ensayo sería de 62 meses. La estimación del cronograma global para este ensayo se apoya en las siguientes fechas límite:</p> <p>Primera Visita del Primer Paciente (FPFV): Julio de 2018.</p> <p>Inclusión del último paciente: Febrerode 2021.</p> <p>Última Visita del Último Paciente (LPLV): Febrero 2024</p>                                                                                                                                                                                                                                                                                                                                                                                                                                                                                                                                                                                                                                                                                                                                                                                                                                                                                                                                                                                                                                                                                                                                                                                                                                                |                                                                                       |                                       |

| Promotor:<br>PETHEMA                                                                                                                                                                                                                                                                                                                                                                                                                                                                                                                                                                                                                                                                                                                                                                                                                                                                                                                                                                                                                                                                                                                                                                                                                                                                                                                                                                                                                                                                                                                                                                                                                | Productos en investigación:<br>Selinexor(KPT-330)/<br>Daratumumab/Bortezomib | Fase de desarrollo:<br>Fase 2 |
|-------------------------------------------------------------------------------------------------------------------------------------------------------------------------------------------------------------------------------------------------------------------------------------------------------------------------------------------------------------------------------------------------------------------------------------------------------------------------------------------------------------------------------------------------------------------------------------------------------------------------------------------------------------------------------------------------------------------------------------------------------------------------------------------------------------------------------------------------------------------------------------------------------------------------------------------------------------------------------------------------------------------------------------------------------------------------------------------------------------------------------------------------------------------------------------------------------------------------------------------------------------------------------------------------------------------------------------------------------------------------------------------------------------------------------------------------------------------------------------------------------------------------------------------------------------------------------------------------------------------------------------|------------------------------------------------------------------------------|-------------------------------|
| <p>Un comité interno de revisión llevará a cabo un análisis provisional para evaluar la seguridad una vez que los primeros seis pacientes incluidos en el estudio hayan completado los dos primeros ciclos. El reclutamiento se cerrará durante este proceso, y se redactará un informe de seguridad indicando si los siguientes pacientes pueden ser tratados con seguridad con arreglo a ese esquema, o si se requiere un ajuste de dosis.</p> <p>Además, se llevará a cabo un segundo análisis provisional para analizar la seguridad y la eficacia una vez que se haya completado el reclutamiento del estudio.</p>                                                                                                                                                                                                                                                                                                                                                                                                                                                                                                                                                                                                                                                                                                                                                                                                                                                                                                                                                                                                             |                                                                              |                               |
| <p>Criterios de evaluación:</p> <p><u>Seguridad:</u></p> <p>La seguridad y tolerabilidad de la combinación SDVd, se evaluará por medio de informes de EAs, exploración física, y determinaciones de seguridad de laboratorio. Para cuantificar el grado de los EAs se utilizarán los Criterios de Terminología Común para Eventos Adversos (CTCAE) del <i>National Cancer Institute</i> (NCI), versión 4.03. Para todos los EAs, los investigadores aportarán su veredicto de causalidad de acuerdo con: 1) no relacionado, 2) posiblemente relacionado, o 3) relacionado.</p> <p><u>Eficacia:</u></p> <p>La principal variable de eficacia del estudio es la tasa de <math>\geq</math> Respuestas Completas, incluyendo RCe y RC.</p> <p>Las variables de eficacia secundarias incluirán las siguientes, determinadas según las definiciones que se han presentado más arriba (Objetivos secundarios).</p> <ul style="list-style-type: none"> <li>• Tasa de respuestas globales (TRG), incluyendo las tasas de VGPR y RP, así como evaluación de la tasa de enfermedad mínima residual negativa.</li> <li>• SLP</li> <li>• SG</li> <li>• DR</li> <li>• TTP</li> </ul> <p><u>Criterios para la retirada del tratamiento:</u></p> <p>El investigador/a puede excluir del estudio a un paciente, según su criterio, por cualquiera de los siguientes motivos:</p> <ul style="list-style-type: none"> <li>• Progresión de la enfermedad (PE)</li> <li>• EAs inaceptables o imposibilidad de tolerar el tratamiento en estudio</li> <li>• El paciente decide abandonar el estudio voluntariamente y retira su consentimiento</li> </ul> |                                                                              |                               |

| Promotor:<br>PETHEMA                                                                                                                                                                                                                                                                                                                                                                                                                                                                                                                                                                                                                                                                                                                                                                                                                                                                                                                                                                                                                                                                                                                                           | Productos en investigación:<br>Selinexor(KPT-330)/<br>Daratumumab/Bortezomib | Fase de desarrollo:<br>Fase 2 |
|----------------------------------------------------------------------------------------------------------------------------------------------------------------------------------------------------------------------------------------------------------------------------------------------------------------------------------------------------------------------------------------------------------------------------------------------------------------------------------------------------------------------------------------------------------------------------------------------------------------------------------------------------------------------------------------------------------------------------------------------------------------------------------------------------------------------------------------------------------------------------------------------------------------------------------------------------------------------------------------------------------------------------------------------------------------------------------------------------------------------------------------------------------------|------------------------------------------------------------------------------|-------------------------------|
| <ul style="list-style-type: none"><li>Cualquier motivo médicamente justificado o cualquier violación significativa del protocolo, en opinión del investigador</li></ul> <p>Los pacientes pueden decidir abandonar el tratamiento en estudio por cualquier motivo. A los pacientes que adopten la decisión de dejar el tratamiento en estudio se les debería animar a continuar en éste, de modo que se pueda obtener la información relativa al seguimiento de la PE y del estatus de supervivencia. Sin embargo, los pacientes pueden optar por retirar su consentimiento y rechazar cualquier participación posterior en el estudio.</p>                                                                                                                                                                                                                                                                                                                                                                                                                                                                                                                     |                                                                              |                               |
| <p>Métodos estadísticos:</p> <p>Los datos más recientes comunicados sobre la eficacia del uso de selinexor en combinación con bortezomib y dexametasona en pacientes con MM en recaída y/o refractarios tras haber recibido entre 1 y 3 líneas de tratamiento previas mostraron una tasa de Respuestas Completas del 13% en el grupo de pacientes que fueron incluidos en la fase de expansión [3]. Nuestra hipótesis es que el añadir daratumumab a la combinación SVd podría aumentar la tasa de <math>\geq</math>RCs hasta el 35%, basado en que la población a incluir en el presente ensayo será diferente a la del CASTOR, puesto que la mayoría de pacientes habrán sido expuestos a lenalidomida y, además, serán refractarios. Con 52 pacientes obtendremos una potencia estadística de aproximadamente el 90% para rechazar la hipótesis nula, con un error alfa predefinido de 0,05 (unilateral). La tasa de respuesta se determinará mediante un análisis por Intención-de-Tratar.</p> <p>Considerando un porcentaje de retiradas del 10%, se incluirá en el ensayo a 5 pacientes más, por lo que el tamaño muestral final es de 57 pacientes.</p> |                                                                              |                               |

Tabla 1. Programa de determinaciones y actividades del estudio

| Ventana de visitas [días]                                                                         | Reclutamiento     | Ciclos 1 y 2 |       |        |        | Ciclos 3 – 6 |       |        |        | Ciclo 7 en adelante | Fin del tratamiento       | Visitas de seguimiento <sup>22</sup> | Seguimiento de la supervivencia <sup>23</sup> |
|---------------------------------------------------------------------------------------------------|-------------------|--------------|-------|--------|--------|--------------|-------|--------|--------|---------------------|---------------------------|--------------------------------------|-----------------------------------------------|
|                                                                                                   | Día -28 al día -1 | Día 1        | Día 8 | Día 15 | Día 22 | Día 1        | Día 8 | Día 15 | Día 22 | Día 1               | 30 días tras última dosis | Cada 30 días                         | Cada 3 meses                                  |
| Consentimiento informado                                                                          | X                 |              |       |        |        |              |       |        |        |                     |                           |                                      |                                               |
| Criterios de inclusión y exclusión <sup>1</sup>                                                   | X                 | X            |       |        |        |              |       |        |        | X                   | X                         |                                      |                                               |
| Datos demográficos                                                                                | X                 |              |       |        |        |              |       |        |        |                     |                           |                                      |                                               |
| Anamnesis                                                                                         | X                 | X            |       |        |        | X            |       |        |        | X                   | X                         | X                                    | X                                             |
| Historial médico, incluyendo detalles de todas las terapias anti-mieloma precedentes <sup>2</sup> | X                 |              |       |        |        |              |       |        |        |                     |                           | X                                    | X                                             |
| Exploración física <sup>3</sup>                                                                   | X                 | X            | X     | X      | X      | X            | X     | X      | X      | X                   | X                         |                                      |                                               |
| Medicaciones concomitantes                                                                        | X                 | X            | X     | X      | X      | X            | X     | X      | X      | X                   | X                         |                                      |                                               |
| Área de superficie corporal (ASC) <sup>4</sup>                                                    | X                 | X            | X     | X      | X      | X            | X     | X      | X      | X                   | X                         |                                      |                                               |
| Signos vitales <sup>5</sup>                                                                       | X                 | X            | X     | X      | X      | X            | X     | X      | X      | X                   | X                         |                                      |                                               |
| ECOG (Eastern Oncology Cooperative Group) <sup>6</sup>                                            | X                 | X            |       |        |        | X            |       |        |        | X                   | X                         |                                      |                                               |
| Ecocardiograma (ETT) o gammagrafía con adquisición sincronizada múltiple (MUGA) <sup>7</sup>      | X                 |              |       |        |        |              |       |        |        |                     |                           |                                      |                                               |
| ECG de 12 derivaciones <sup>7b</sup>                                                              | X                 | X            |       |        |        | X            |       |        |        | X                   | X                         |                                      |                                               |
| Evaluación oftalmológica <sup>8</sup>                                                             | X                 |              |       |        |        |              |       |        |        |                     | X                         |                                      |                                               |
| Test de volumen de espiración forzada <sup>9</sup>                                                | X                 |              |       |        |        |              |       |        |        |                     |                           |                                      |                                               |
| Urinálisis <sup>10</sup>                                                                          | X                 | X            |       |        |        | X            |       |        |        | X                   | X                         |                                      |                                               |
| Recuento sanguíneo completo (RSC) con diferencial <sup>11</sup>                                   | X                 | X            | X     | X      | X      | X            | X     | X      | X      | X                   | X                         |                                      |                                               |
| Tirotropina (TSH)                                                                                 | X                 | X            |       |        |        | X            |       |        |        | X                   | X                         |                                      |                                               |
| Química sérica completa <sup>12</sup>                                                             | X                 | X            |       |        |        | X            |       |        |        | X                   | X                         |                                      |                                               |
| Química sérica limitada <sup>13</sup>                                                             |                   |              | X     | X      | X      |              |       | X      |        |                     |                           |                                      |                                               |
| Pruebas de coagulación <sup>14</sup>                                                              | X                 | X            |       |        |        | X            |       |        |        | X                   | X                         |                                      |                                               |
| Tipaje ABO/Rh y prueba de antiglobulina indirecta <sup>15</sup>                                   | X                 |              |       |        |        |              |       |        |        |                     |                           |                                      |                                               |
| Evaluación de enfermedad ósea <sup>16</sup>                                                       | X                 |              |       |        |        |              |       |        |        |                     |                           |                                      |                                               |
| Evaluación de plasmocitomas extramedulares <sup>17</sup>                                          | X                 |              |       |        |        |              |       |        |        |                     |                           |                                      |                                               |
| Electroforesis de proteínas séricas (EFPS) <sup>18</sup>                                          | X                 | X            |       |        |        | X            |       |        |        | X                   | X                         |                                      |                                               |
| Inmunofijación en suero <sup>19</sup>                                                             | X                 | X            |       |        |        | X            |       |        |        | X                   | X                         |                                      |                                               |

| Ventana de visitas [días]                                             | Reclutamiento     | Ciclos 1 y 2 |       |        |        | Ciclos 3 – 6 |       |        |        | Ciclo 7 en adelante | Fin del tratamiento       | Visitas de seguimiento <sup>22</sup> | Seguimiento de la supervivencia <sup>23</sup> |
|-----------------------------------------------------------------------|-------------------|--------------|-------|--------|--------|--------------|-------|--------|--------|---------------------|---------------------------|--------------------------------------|-----------------------------------------------|
|                                                                       | Día -28 al día -1 | Día 1        | Día 8 | Día 15 | Día 22 | Día 1        | Día 8 | Día 15 | Día 22 | Día 1               | 30 días tras última dosis | Cada 30 días                         | Cada 3 meses                                  |
| Electroforesis de proteínas en orina de 24 horas (EFPO) <sup>18</sup> | X                 | X            |       |        |        | X            |       |        |        | X                   | X                         |                                      |                                               |
| Inmunofijación en orina <sup>19</sup>                                 | X                 | X            |       |        |        | X            |       |        |        | X                   | X                         |                                      |                                               |
| Cadenas ligeras libres en suero (CLLs)                                | X                 | X            |       |        |        | X            |       |        |        | X                   | X                         |                                      |                                               |
| β <sub>2</sub> -microglobulina                                        | X                 |              |       |        |        |              |       |        |        |                     |                           |                                      |                                               |
| Niveles cuantitativos de inmunoglobulinas                             | X                 |              |       |        |        |              |       |        |        |                     | X                         |                                      |                                               |
| Test sérico de embarazo <sup>20</sup>                                 | X                 |              |       |        |        |              |       |        |        |                     | X                         |                                      |                                               |
| Aspirado de médula ósea <sup>21</sup>                                 | X                 |              |       |        |        |              |       |        |        |                     |                           |                                      |                                               |
| Eventos adversos                                                      | X                 | X            | X     | X      | X      | X            | X     | X      | X      | X                   | X                         | X                                    | X                                             |
| Nuevo tratamiento anti-mieloma                                        |                   |              |       |        |        |              |       |        |        |                     | X                         | X                                    | X                                             |
| Test detección virus VIH y VHB y VHC <sup>24</sup>                    | X                 |              |       |        |        |              |       |        |        |                     |                           |                                      |                                               |
| Estudios biológicos <sup>21</sup>                                     | X                 |              |       |        |        | X            |       |        |        |                     |                           |                                      |                                               |

<sup>1</sup> Los criterios de inclusión y exclusión deberían revisarse el día 1 del ciclo 1, antes del inicio del tratamiento en estudio.

<sup>2</sup> Incluye síntomas basales así como una historia detallada de terapias antineoplásicas previas, especialmente terapias anti-mieloma múltiple (MM), incluyendo fechas de inicio y finalización, progresión de la enfermedad (PE) durante o tras la terapia, así como retiradas debidas a intolerancia o a cualquier otra enfermedad seria.

<sup>3</sup> Exploración física (EF) completa en las visitas basal y de fin del estudio. Las EFs durante el estudio deberían estar orientadas a los síntomas. La EF incluye: altura y peso corporal (ropa interior sin zapatos, en kg) el primer día de cada ciclo.

<sup>4</sup> El área de superficie corporal (ASC) se calculará mediante el método de Dubois (Dubois *et al*, Arch Intern Medicine 1916 [4]) o Mosteller (Mosteller *et al*, N Eng J Med 1987 [5]) durante el reclutamiento y antes de cualquier incremento de la dosis. No se permite dicho incremento a los pacientes con una ASC <1,4 m<sup>2</sup>.

<sup>5</sup> Tensión arterial, frecuencia cardíaca y temperatura.

<sup>6</sup> Las determinaciones del estado funcional ECOG (Oken *et al*, Am J Clin Oncol 1982 [6]) se llevarán a cabo el día 1 de cada ciclo.

<sup>7</sup> Solo se requiere ETT o MUGA en los pacientes con enfermedad cardíaca preexistente conocida, particularmente en pacientes que han recibido previamente antraciclina. 7b: Se repetirá el ECG basal de 12 derivaciones en el día 1 de cada ciclo solo en caso de que ese estimara clínicamente necesario

<sup>8</sup> La exploración oftalmológica completa se realizará en los pacientes con problemas oculares diferentes a los relacionados con lentes de corrección. Se requiere una exploración en el momento del reclutamiento y en la visita final en los pacientes con tales problemas. Antes de la dilatación: agudeza visual mejor corregida, examen con lámpara de hendidura que incluya tonometría; después de la dilatación: fundoscopia y lámpara de hendidura para documentar la claridad del cristalino –si se detecta una catarata durante la exploración, ésta se clasificará con arreglo al sistema de clasificación de opacidades del cristalino (Apéndice 4, SCOC III).

<sup>9</sup> Los sujetos con asma o EPOC conocidas o sospechadas tienen que someterse a una prueba de volumen espiratorio forzado (VEF) durante el reclutamiento.

- <sup>10</sup> Incluye apariencia, color, bilirrubina en la orina, glucosa, hemoglobina, cetonas, pH, proteínas, gravedad específica, y urobilinógeno. Solo se llevará a cabo microscopía cuando esté indicada clínicamente.
- <sup>11</sup> El RSC con diferencial incluye hemoglobina, hematocrito, volumen corpuscular medio, hemoglobina corpuscular media, concentración de la hemoglobina corpuscular media, recuento de glóbulos blancos (RGB), RGB diferencial, recuento de eritrocitos, linfocitos, monocitos, neutrófilos, neutrófilos en banda, eosinófilos, basófilos, plaquetas. Se pueden determinar los reticulocitos solo cuando esté clínicamente indicado.
- <sup>12</sup> Química sérica completa en situación basal, el día 1 de cada ciclo y en la visita de fin del estudio: incluye sodio, potasio, cloruro, bicarbonato, nitrógeno ureico en la sangre (BUN), creatinina, glucosa, calcio, fosfato, magnesio, alanina transaminasa (ALT), aspartato transaminasa (AST), fosfatasa alcalina, bilirrubina total, lactato deshidrogenasa (LDH), proteínas totales, albúmina. Si la concentración de bilirrubina total se incrementa por encima de 1,5 veces con respecto al límite superior normal, ésta deberá venir especificada como bilirrubina directa o bilirrubina indirecta.
- <sup>13</sup> En los días 8, 15 y 22 de los ciclos 1 y 2 se realizará una química sérica limitada; en el día 15 de los ciclos 3 al 6, las pruebas incluirán: sodio, potasio, cloruro, bicarbonato, BUN, creatinina, glucosa, ALT, AST, fosfatasa alcalina, bilirrubina total y LDH.
- <sup>14</sup> Incluye tiempo de protrombina (TP), ratio internacional normalizado (INR), y tiempo de tromboplastina parcial activada (TTPa).
- <sup>15</sup> Daratumumab interfiere con el test de antiglobulina indirecta (TAI). Este resultado positivo enmascara la detección de anticuerpos dirigidos frente a antígenos menores, y puede dificultar o impedir la identificación de productos sanguíneos compatibles con el receptor de la transfusión. Esta interferencia puede prolongarse hasta seis meses después de haber terminado el tratamiento. Por este motivo, antes del inicio del tratamiento con Daratumumab, se debe determinar en todos los pacientes si presentan anticuerpos frente a antígenos menores (TAI), así como llevar a cabo el tipaje ABO/RhD.
- <sup>16</sup> La valoración de enfermedad ósea se realizará en la visita de reclutamiento y, en lo sucesivo, cuando esté clínicamente indicado. Preferiblemente debería emplearse la misma técnica de imagen para valorar al paciente a lo largo de todo el tratamiento en estudio, cuando esté indicado.
- <sup>17</sup> Los plasmocitomas extramedulares deberían determinarse durante la fase de reclutamiento en todos los sujetos con historia de plasmocitomas, o si está clínicamente indicado. Se puede emplear el examen clínico o la tecnología de imagen por resonancia magnética (IRM). Las exploraciones mediante tomografía computarizada (TC) constituyen una alternativa válida. La tomografía por emisión de positrones-TC (TEP-TC) también se acepta si la determinación del plasmocitoma extramedular se lleva a cabo en la parte de TC. La determinación de plasmocitomas detectables mediante exploración física debería llevarse a cabo cada 4 semanas, o cuando esté clínicamente indicado. Si la determinación solo se puede realizar radiológicamente, entonces la evaluación de plasmocitomas extramedulares puede realizarse cada 12 semanas. Para cada paciente, la metodología empleada debería ser la misma en todas sus visitas.
- <sup>18</sup> La evaluación de la respuesta se realiza en función de proteína M en suero, proteína M en orina, o cadenas ligeras libres en suero.
- <sup>19</sup> La inmunofijación en suero y orina debe realizarse en la visita de reclutamiento, en el día 1 de cada ciclo y en el caso de confirmación de respuesta completa (RC).
- <sup>20</sup> Para mujeres en edad fértil se requiere un test de embarazo de gonadotropina coriónica humana (GCh) en los tres días previos a la primera dosis del tratamiento en estudio.
- <sup>21</sup> El aspirado y/o biopsia de médula ósea deben llevarse a cabo en el reclutamiento, después de completar el ciclo 4, para confirmar la RC y para el seguimiento de la EMR (apéndice 7)

- <sup>22</sup> Existen visitas de seguimiento del paciente cada 30 días, de ser posible en la clínica, o mediante contacto telefónico. Se requiere que estas visitas de seguimiento cada 30 días las realicen los pacientes que abandonen el tratamiento y no hayan recaído o progresado en el momento de la visita de fin de tratamiento.
- <sup>23</sup> Los pacientes que abandonen el tratamiento debido a PE pueden pasar a seguimiento de supervivencia. Se realizará una llamada telefónica al paciente (o a su familia) cada 3 meses para indagar acerca del estado del MM del paciente, y recabar información acerca de cualquier terapia antineoplásica utilizada desde la retirada del tratamiento con SDVd.
- <sup>24</sup> Debe realizarse un test de detección de infección por VIH, hepatitis B y hepatitis C durante el periodo de screening para confirmar cumplimiento de criterio de exclusión

## LISTA DE ABREVIATURAS

| Abreviatura | Definición                                                       |
|-------------|------------------------------------------------------------------|
| AcMo        | Anticuerpo monoclonal                                            |
| ADCC        | Citotoxicidad celular mediada por anticuerpos                    |
| ADN         | Ácido desoxirribonucleico                                        |
| ADCP        | Fagocitosis celular mediada por anticuerpos                      |
| AIT         | Análisis por intención de tratar                                 |
| AIVD        | Actividades instrumentales de la vida diaria                     |
| ALT         | Alanina transaminasa                                             |
| Anti-HBc    | Anticuerpos frente a antígenos del <i>core</i> de la hepatitis B |
| Anti-HBs    | Anticuerpos frente a antígenos de superficie de la hepatitis B   |
| Anti-HCV    | Anticuerpos frente al virus de la hepatitis C                    |
| APP         | Análisis por protocolo                                           |
| ARN         | Ácido ribonucleico                                               |
| ASC         | Área de superficie corporal                                      |
| ASCO        | <i>American Society of Clinical Oncology</i>                     |
| AST         | Aspartato transaminasa                                           |
| AV          | Auriculoventricular                                              |
| AVD         | Actividades de la vida diaria                                    |
| BFAI        | Bloqueo fascicular anterior izquierdo                            |
| BPC         | Buenas Prácticas Clínicas                                        |
| BRDHH       | Bloqueo de la rama derecha del haz de His                        |
| B-reg       | Células B reguladoras                                            |
| BUN         | Nitrógeno uréico en sangre                                       |
| CCDA        | Citotoxicidad celular dependiente de anticuerpo                  |
| CDC         | Citotoxicidad dependiente del complemento                        |
| CEI         | Comité de Ética Independiente                                    |
| CLLs        | Cadenas ligeras libres en suero                                  |
| cm          | Centímetros                                                      |
| CMSD        | Comisión de Monitorización de la Seguridad y de los Datos        |
| CPP         | Péptidos de penetración celular                                  |
| CrCl        | Aclaramiento de creatinina                                       |
| CRI         | Comité de Revisión Institucional                                 |
| CSR         | Clinical study report                                            |
| CSTs        | Ensayos promovidos por compañía farmacéutica                     |
| CTCAE       | Criterios de Terminología Común para Eventos Adversos            |
| CTEP        | <i>Cancer Therapy Evaluation Program</i>                         |
| CVF         | Capacidad vital forzada                                          |
| Dara        | Daratumumab                                                      |
| DCI         | Documento de consentimiento informado                            |
| DE          | Desviación estándar                                              |
| Dex         | Dexametasona                                                     |
| DMT         | Dosis Máxima Tolerada                                            |
| DR          | Duración de la respuesta                                         |
| DTT         | Ditiotreitol                                                     |
| DVd         | Daratumumab con bortezomib y dexametasona                        |
| EA          | Evento adverso                                                   |
| EAEI        | Evento adverso de especial interés                               |
| EAG         | Evento adverso grave                                             |
| EAET        | Evento adverso emergente durante el tratamiento                  |

|                  |                                                      |
|------------------|------------------------------------------------------|
| ECG              | Electrocardiograma                                   |
| ECOG             | <i>Eastern Cooperative Oncology Group</i>            |
| eCRD             | Cuaderno electrónico de recogida de datos            |
| EDTA             | Ácido etilendiaminetetraacético                      |
| EE               | Enfermedad estable                                   |
| EE.UU.           | Estados Unidos de América                            |
| EF               | Exploración física                                   |
| EMA              | Agencia Europea del Medicamento                      |
| EMR              | Enfermedad mínima residual                           |
| EP               | Enfermedad progresiva                                |
| EPO              | Eritropoyetina                                       |
| EPOC             | Enfermedad pulmonar obstructiva crónica              |
| EFPO             | Electroforesis de proteínas en orina de 24 horas     |
| EFPS             | Electroforesis de proteínas séricas                  |
| ETT              | Ecocardiograma transtorácico                         |
| FACS             | <i>Fluorescence-activated cell sorting</i>           |
| FCDA             | Fagocitosis celular dependiente de anticuerpo        |
| FDA              | <i>Food and Drugs Administration</i>                 |
| FEV <sub>1</sub> | Volumen espiratorio forzado en el primer segundo     |
| FVC              | Capacidad vital forzada                              |
| FISH             | Hibridación fluorescente <i>in situ</i>              |
| FPFV             | Primera visita del primer paciente                   |
| g                | Gramo                                                |
| GCh              | Gonadotropina coriónica humana                       |
| G-CSF            | Factores estimuladores de colonias de granulocitos   |
| GMSI             | Gammapatía monoclonal de significado indeterminado   |
| GSH              | Glutación                                            |
| CTEP             | <i>Cancer Therapy Evaluation Program</i>             |
| h                | Hora/s                                               |
| HBcAg            | Antígeno del core de la hepatitis B                  |
| HBsAg            | Antígeno de superficie de la hepatitis B             |
| 5-HT3            | 5-hidroxitriptamina                                  |
| IAM              | Infarto agudo de miocardio                           |
| IBP              | Inhibidores de la bomba de protones                  |
| IC               | Intervalo de confianza                               |
| ICC              | Insuficiencia cardíaca congestiva                    |
| ICH              | Conferencia Internacional de Armonización            |
| iFISH            | Hibridación fluorescente <i>in situ</i> en interfase |
| IMiD             | Fármaco inmunomodulador                              |
| IMWG             | <i>International Myeloma Working Group</i>           |
| INR              | Ratio internacional normalizado                      |
| IP               | Inhibidor del proteasoma                             |
| ISS              | <i>International Staging System</i>                  |
| ISTs             | Ensayos promovidos por investigadores                |
| ITT              | Intención de tratar/por intención de tratar          |
| i.v.             | Administración intravenosa                           |
| JEI              | Junta de Ética en la Investigación                   |
| kg               | Kilogramos                                           |
| LDH              | Lactato deshidrogenasa                               |
| LEN              | Lenalidomida                                         |

|         |                                                              |
|---------|--------------------------------------------------------------|
| LPLV    | Última visita del último paciente                            |
| MBRP    | Muy buena respuesta parcial                                  |
| MCS     | Mejor cuidado de soporte                                     |
| MDSC    | Células supresoras derivadas de la línea mieloide            |
| MDT     | Máxima dosis tolerada                                        |
| MedDRA  | Diccionario Médico para Actividades Reguladoras              |
| min     | Minuto/s                                                     |
| MM      | Mieloma múltiple                                             |
| MMq     | Mieloma múltiple quiescente                                  |
| MUGA    | Gammagrafía con adquisición sincronizada múltiple            |
| NAC     | N-acetilcisteína                                             |
| NCI     | <i>National Cancer Institute</i>                             |
| NCNN    | <i>National Comprehensive Cancer Network®</i>                |
| NES     | Secuencias de exportación nuclear                            |
| NGF     | Citometría de flujo de nueva generación                      |
| NGS     | Secuenciación de nueva generación                            |
| NHBLI   | <i>National Heart, Lung, and Blood Institute</i>             |
| NK      | Células <i>natural killer</i>                                |
| NK1R    | Receptor de la neuroquinina 1                                |
| NYHA    | <i>New York Heart Association</i>                            |
| PE      | Progresión de la enfermedad                                  |
| p.ej.   | Por ejemplo                                                  |
| PET     | Tomografía de emisión de positrones                          |
| PP      | Por protocolo                                                |
| PST     | Proteínas supresoras de tumores                              |
| PT      | Término preferido                                            |
| Q2W     | Cada 2 semanas                                               |
| Q4W     | Cada 4 semanas                                               |
| q.d.    | Una vez al día                                               |
| q.i.d.  | Cuatro veces al día                                          |
| RAN     | Recuento absoluto de neutrófilos                             |
| RC      | Respuesta completa                                           |
| RCe     | Respuesta completa estricta                                  |
| RCP     | Reclamación acerca de la calidad del producto                |
| Rd      | Lenalidomida y dexametasona                                  |
| RG      | Respuesta global                                             |
| RGB     | Recuento de glóbulos blancos                                 |
| R-ISS   | <i>Revised Multiple Myeloma International Staging System</i> |
| RM      | Respuesta mínima                                             |
| RMN     | Resonancia magnética nuclear                                 |
| RNA-seq | Secuenciación de ARN                                         |
| RP      | Respuesta parcial                                            |
| RPMB    | Respuesta parcial muy buena                                  |
| R/R     | En recaída y refractario                                     |
| RSC     | Recuento sanguíneo completo                                  |
| SAM     | S-adenosilmetionina                                          |
| s.c.    | Administración subcutánea                                    |
| SCOC    | Sistema de clasificación de opacidades del cristalino        |
| SDVd    | Selinexor, Daratumumab, bortezomib (velcade) y dexametasona  |
| Sel     | Selinexor                                                    |

|         |                                                                     |
|---------|---------------------------------------------------------------------|
| Sel-Dex | Selinexor-Dexametasona                                              |
| SG      | Supervivencia global                                                |
| SIADH   | Síndrome de secreción inadecuada de hormona antidiurética           |
| siARN   | ARN de silenciamiento                                               |
| SINE    | Inhibidor selectivo de la exportación nuclear                       |
| SLE     | Supervivencia libre de enfermedad                                   |
| SLP     | Supervivencia libre de progresión                                   |
| SOC     | Clasificación MedDRA por Órganos y Sistemas                         |
| SOd     | Selinexor, daratumumab, dexametasona                                |
| SUV     | Valor de captación estandarizado                                    |
| SVd     | Selinexor, bortezomib y dexametasona                                |
| SVDd    | Selinexor más dexametasona, bortezomib y daratumumab                |
| TAI     | Test de antiglobulina indirecta                                     |
| TBC     | Tasa de beneficio clínico                                           |
| TC      | Tomografía computarizada                                            |
| TCE     | Tasa de control de la enfermedad (RCe, RC, RP, EE $\geq$ 4 semanas) |
| TP      | Tiempo de protrombina                                               |
| TTP     | Tiempo hasta la progresión                                          |
| TTPa    | Tiempo de tromboplastina parcial activada                           |
| T-reg   | Células T reguladoras                                               |
| TRG     | Tasa de respuesta global                                            |
| TSG     | Tasa de supervivencia global                                        |
| TSH     | Tirotropina                                                         |
| UE      | Unión Europea                                                       |
| Vd      | Bortezomib y dexametasona                                           |
| VEF     | Volumen espiratorio forzado                                         |
| VEF1    | Volumen espiratorio forzado en el primer segundo                    |
| VHB     | Virus de la hepatitis B                                             |
| VHC     | Virus de la hepatitis C                                             |
| VIH     | Virus de la inmunodeficiencia humana                                |
| v.i.    | Vía intravenosa                                                     |
| v.o.    | Vía oral                                                            |
| XPO1    | Exportina 1                                                         |

## ÍNDICE

|                                                                                                     |    |
|-----------------------------------------------------------------------------------------------------|----|
| RESUMEN DEL PROTOCOLO .....                                                                         | 4  |
| LISTA DE ABREVIATURAS.....                                                                          | 16 |
| 1 PERSPECTIVA GENERAL .....                                                                         | 25 |
| 1.1 Estudios con bortezomib como apoyo para esta combinación .....                                  | 28 |
| 2 MIELOMA MÚLTIPLE .....                                                                            | 30 |
| 3 EXPORTACIÓN NUCLEAR .....                                                                         | 31 |
| 3.1 Inhibición de XPO1 en cáncer humano .....                                                       | 31 |
| 3.2 Anticuerpos monoclonales en mieloma .....                                                       | 34 |
| 4 SELINEXOR (KPT-330), DARATUMUMAB, BORTEZOMIB.....                                                 | 35 |
| 5 OBJETIVOS DEL ESTUDIO .....                                                                       | 35 |
| 5.1 Objetivo principal .....                                                                        | 35 |
| 5.2 Objetivos secundarios.....                                                                      | 35 |
| 5.3 Objetivos exploratorios.....                                                                    | 36 |
| 6 DISEÑO DEL ESTUDIO .....                                                                          | 36 |
| 6.1 Compendio del diseño del estudio .....                                                          | 36 |
| 6.2 Comisión de Monitorización de la Seguridad y de los Datos .....                                 | 40 |
| 7 SELECCIÓN DE PACIENTES .....                                                                      | 41 |
| 7.1 Número de pacientes.....                                                                        | 41 |
| 7.2 Reclutamiento .....                                                                             | 41 |
| 7.3 Criterios de inclusión .....                                                                    | 41 |
| 7.4 Criterios de exclusión.....                                                                     | 43 |
| 7.5 Fallos en el reclutamiento.....                                                                 | 46 |
| 8 TRATAMIENTO .....                                                                                 | 46 |
| 8.1 Administración de daratumumab .....                                                             | 46 |
| 8.1.1 Preparación del daratumumab.....                                                              | 46 |
| 8.1.2 Administración de daratumumab.....                                                            | 47 |
| 8.1.3 Pautas para la prevención y manejo de las reacciones a la<br>inyección (Daratumumab).....     | 47 |
| 8.1.4 Daratumumab: información de seguridad de referencia .....                                     | 48 |
| 8.1.5 Manejo de las reacciones asociadas a la inyección<br>(Daratumumab) .....                      | 50 |
| 8.2 Administración de selinexor.....                                                                | 52 |
| 8.2.1 Dosificación y administración de selinexor y dexametasona.....                                | 52 |
| 8.2.2 Pautas para la administración de selinexor.....                                               | 54 |
| 8.2.3 Recomendaciones sobre cuidados de soporte ante eventos<br>adversos asociados a selinexor..... | 54 |
| 8.2.4 Pautas de reducción de dosis .....                                                            | 54 |
| 8.2.5 Condiciones que no requieren reducción de dosis de selinexor..                                | 60 |
| 8.2.6 Ajuste de la dosis de selinexor en un contexto de infección .....                             | 60 |
| 8.3 Pautas para la administración de bortezomib .....                                               | 61 |

|       |                                                                                                                           |    |
|-------|---------------------------------------------------------------------------------------------------------------------------|----|
| 8.3.1 | Reconstitución del vial de 3,5 mg de bortezomib .....                                                                     | 62 |
| 8.3.2 | Reconstitución y administración subcutánea (s.c.) de bortezomib .....                                                     | 62 |
| 8.3.3 | Reconstitución y administración intravenosa (i.v.) de bortezomib .....                                                    | 63 |
| 8.3.4 | Reacciones tóxicas asociadas a bortezomib y modificaciones de dosis.....                                                  | 63 |
| 8.4   | Pautas para la administración de dexametasona .....                                                                       | 65 |
| 8.4.1 | Reacciones tóxicas asociadas a dexametasona y modificaciones de dosis.....                                                | 65 |
|       | Edema de grado $\geq 3$ .....                                                                                             | 66 |
| 8.5   | Pautas generales de reducción de dosis .....                                                                              | 67 |
| 8.5.1 | Retrasos en la dosificación y modificaciones de la dosis (principios generales) .....                                     | 67 |
| 9     | PLAN DEL ESTUDIO Y PROCEDIMIENTOS .....                                                                                   | 68 |
| 9.1   | Número de paciente del estudio .....                                                                                      | 68 |
| 9.2   | Descripción de los días del estudio.....                                                                                  | 69 |
| 9.2.1 | Periodo de reclutamiento: Visita de screening o de selección (Dentro de los 28 días previos al inicio de la terapia)..... | 69 |
| 9.2.2 | Fase de tratamiento .....                                                                                                 | 70 |
| 9.2.3 | Visita final .....                                                                                                        | 74 |
| 9.2.4 | Visitas de seguimiento .....                                                                                              | 74 |
| 9.2.5 | Seguimiento de la supervivencia .....                                                                                     | 75 |
| 10    | ALMACENAMIENTO DE LOS FÁRMACOS.....                                                                                       | 75 |
| 10.1  | Selinexor.....                                                                                                            | 75 |
| 10.2  | Dexametasona.....                                                                                                         | 77 |
| 10.3  | Daratumumab .....                                                                                                         | 77 |
| 10.4  | Bortezomib .....                                                                                                          | 77 |
| 11    | RECUENTO DE LOS FÁRMACOS .....                                                                                            | 78 |
| 12    | MEDICACIONES CONCOMITANTES .....                                                                                          | 79 |
| 12.1  | Pautas generales.....                                                                                                     | 79 |
| 12.2  | Terapias recomendadas.....                                                                                                | 79 |
| 12.3  | Terapias permitidas .....                                                                                                 | 82 |
| 12.4  | Terapias prohibidas.....                                                                                                  | 82 |
| 13    | CUMPLIMIENTO DEL TRATAMIENTO .....                                                                                        | 83 |
| 14    | REQUISITOS DE CONTRACEPCIÓN .....                                                                                         | 84 |
| 15    | MÉTODOS DE EVALUACIÓN Y OBJETIVOS DE ANÁLISIS.....                                                                        | 86 |
| 15.1  | Datos demográficos .....                                                                                                  | 86 |
| 15.2  | Historial médico.....                                                                                                     | 86 |
| 15.3  | Medicaciones concomitantes.....                                                                                           | 86 |
| 15.4  | Exploración física y escala ECOG .....                                                                                    | 86 |

|        |                                                                                                              |     |
|--------|--------------------------------------------------------------------------------------------------------------|-----|
| 15.5   | Evaluación de enfermedad ósea (examen esquelético, TC o TC de baja dosis o PET-TC) .....                     | 87  |
| 15.5.1 | Interferencia con la determinación de la respuesta completa ....                                             | 87  |
| 15.5.2 | Interferencia en la electroforesis de proteínas séricas y pruebas de inmunofijación .....                    | 87  |
| 15.6   | Determinaciones relacionadas con la seguridad.....                                                           | 88  |
| 15.7   | Estudios complementarios y exploratorios .....                                                               | 90  |
| 15.7.1 | Estudios Biológicos propuestos .....                                                                         | 90  |
| 15.8   | Objetivos de eficacia adicionales.....                                                                       | 91  |
| 15.9   | Procedimientos de eficacia .....                                                                             | 91  |
| 15.9.1 | Determinación de enfermedad objetiva .....                                                                   | 91  |
| 15.9.2 | Objetivos de eficacia .....                                                                                  | 92  |
| 15.9.3 | Criterios de respuesta .....                                                                                 | 92  |
| 15.9.4 | Documentación de plasmocitomas extramedulares .....                                                          | 92  |
| 16     | CRITERIOS DE RETIRADA.....                                                                                   | 93  |
| 16.1   | Retirada temprana del estudio.....                                                                           | 93  |
| 16.2   | Retirada temprana de pacientes individuales.....                                                             | 93  |
| 17     | PRODUCTO EN INVESTIGACIÓN Y FINANCIACIÓN DEL ESTUDIO .....                                                   | 94  |
| 18     | EVENTOS ADVERSOS .....                                                                                       | 95  |
| 18.1   | Eventos adversos graves .....                                                                                | 97  |
| 18.1.1 | Seguimiento de EA y EAG .....                                                                                | 98  |
| 18.1.2 | EA y EAG post-estudio.....                                                                                   | 98  |
| 18.2   | Abuso, mal uso, errores en la medicación, y exposición involuntaria/accidental, exposición ocupacional ..... | 99  |
| 18.2.1 | Sobredosificación .....                                                                                      | 99  |
| 18.2.2 | Abuso, mal uso o error en la medicación .....                                                                | 100 |
| 18.2.3 | Exposición involuntaria/ accidental, exposición ocupacional ....                                             | 100 |
| 18.3   | Reclamaciones acerca de la calidad del producto.....                                                         | 101 |
| 18.4   | Embarazo y lactancia .....                                                                                   | 101 |
| 18.5   | Comunicación de EAG .....                                                                                    | 102 |
| 18.5.1 | Requisitos de los informes .....                                                                             | 102 |
| 18.5.2 | EA de especial interés (EAEI) .....                                                                          | 104 |
| 19     | MÉTODOS ESTADÍSTICOS .....                                                                                   | 104 |
| 19.1   | Planes estadísticos y analíticos.....                                                                        | 104 |
| 19.2   | Determinación del tamaño muestral.....                                                                       | 105 |
| 19.3   | Disposición de los pacientes .....                                                                           | 105 |
| 19.4   | Análisis de los conjuntos de datos.....                                                                      | 105 |
| 19.4.1 | Población a analizar .....                                                                                   | 105 |
| 19.5   | Análisis de datos y presentación .....                                                                       | 106 |
| 19.5.1 | Características demográficas.....                                                                            | 106 |
| 19.5.2 | Características basales e historial médico.....                                                              | 106 |

|            |                                                                                                                                   |     |
|------------|-----------------------------------------------------------------------------------------------------------------------------------|-----|
| 19.5.3     | Objetivo principal.....                                                                                                           | 106 |
| 19.5.4     | Objetivos secundarios .....                                                                                                       | 107 |
| 19.5.5     | Objetivos secundarios y exploratorios adicionales .....                                                                           | 107 |
| 19.5.6     | Datos de seguridad .....                                                                                                          | 108 |
| 19.5.7     | Procedimientos para el manejo de datos perdidos.....                                                                              | 110 |
| 19.6       | Cambios en la dirección del estudio o en los análisis previstos.....                                                              | 110 |
| 20         | OBLIGACIONES REGULATORIAS, ÉTICAS Y LEGALES .....                                                                                 | 110 |
| 20.1       | Obligaciones regulatorias y éticas .....                                                                                          | 110 |
| 20.2       | Comités de Revisión de las Instituciones/Comités de Ética.....                                                                    | 110 |
| 20.3       | Aprobación de las autoridades reguladoras .....                                                                                   | 111 |
| 20.4       | Cumplimiento del protocolo .....                                                                                                  | 111 |
| 20.5       | Enmiendas al protocolo .....                                                                                                      | 111 |
| 20.6       | Consentimiento informado .....                                                                                                    | 111 |
| 20.7       | Confidencialidad del paciente y divulgación.....                                                                                  | 112 |
| 20.8       | Conservación de muestras a largo plazo para futuras investigaciones....                                                           | 112 |
| 20.9       | Compilación, autorización de la documentación sobre el estudio y<br>almacenamiento de datos.....                                  | 113 |
| 20.9.1     | Documentación del estudio, mantenimiento de registros y<br>retención de documentos .....                                          | 113 |
| 20.9.2     | Procedimiento de auditado .....                                                                                                   | 114 |
| 20.10      | Divulgación de información .....                                                                                                  | 115 |
| 20.11      | Suspensión del estudio .....                                                                                                      | 115 |
| 21         | RESPONSABILIDAD Y SEGURO .....                                                                                                    | 115 |
| 22         | INFORMES SOBRE EL ESTUDIO, POLÍTICA DE PUBLICACIÓN Y ARCHIVADO DE LA<br>DOCUMENTACIÓN SOBRE EL ESTUDIO .....                      | 116 |
| 22.1       | Informes sobre el estudio y política de publicación .....                                                                         | 116 |
| 23         | REFERENCIAS .....                                                                                                                 | 117 |
| Apéndice 1 | Criterios del estado funcional <i>Eastern Cooperative Oncology<br/>Group</i> (ECOG) .....                                         | 122 |
| Apéndice 2 | Sistema Internacional de Estadiaje de Mieloma Múltiple y<br>Sistema Internacional de Estadiaje de Mieloma Múltiple revisado ..... | 123 |
| Apéndice 3 | Criterios de respuesta del Grupo de Trabajo INTERNACIONAL de<br>Mieloma (IMWG) .....                                              | 124 |
|            | (modificado a partir de Kumar S <i>ET AL</i> , Lancet Oncology 2016 [59]) .....                                                   | 124 |
| Apéndice 4 | Sistema de Clasificación de Opacidades del Cristalino III (SCOC<br>III) .....                                                     | 128 |
| Apéndice 5 | PAutas NCCN para la Práctica Clínica en Oncología:<br>Antiemesis .....                                                            | 129 |
| Apéndice 6 | Pautas NCCN para la Práctica Clínica en Oncología:<br>Anorexia/Caquexia.....                                                      | 131 |
| Apéndice 7 | Laboratorio central para muestras exploratorias .....                                                                             | 132 |
| Apéndice 8 | CRITERIOS NHLBI DE CLASIFICACIÓN DE LA SEVERIDAD DEL<br>ASMA .....                                                                | 136 |

|            |                                                                                 |     |
|------------|---------------------------------------------------------------------------------|-----|
| Apéndice 9 | REVISIÓN INTERNACIONAL de CRITERIOS DE DIAGNÓSTICO DEL<br>MIELOMA MÚLTIPLE..... | 137 |
|------------|---------------------------------------------------------------------------------|-----|

## 1 PERSPECTIVA GENERAL

El mieloma múltiple (MM) es la segunda neoplasia hematológica más común (después del linfoma no Hodgkin), y representa el 1% de todos los cánceres y el 2% de todas las muertes por cáncer. A pesar del incremento de la eficacia de los agentes de primera línea, la mayor parte de pacientes finalmente recaerán y se harán resistentes al tratamiento, y sigue existiendo la necesidad de terapias para estos pacientes en recaída y/o refractarios, que puedan mejorar la tasa de supervivencia global.

Selinexor es un inhibidor selectivo de la exportación nuclear (SINE™) que se une a la exportina 1 (XPO1) y la inactiva, por lo que fuerza la retención nuclear de proteínas supresoras de tumores (PST) muy importantes. La retención temporal de altos niveles de PSTs en el núcleo, motivada por el bloqueo de XPO1, activa tanto el control que éstas llevan a cabo sobre el ciclo celular como acciones sobre el propio genoma. Estos hechos conducen a la muerte de casi todos los tipos de células malignas, mientras que las células normales experimentan un bloqueo temporal del ciclo celular, seguido de su recuperación cuando se desactiva el bloqueo de la exportación. La reactivación de múltiples vías de supresión tumoral, a través de la inhibición de una única proteína no redundante; así como la inhibición, a través del citado mecanismo, del transporte de proteínas que juegan un papel clave para la supervivencia, representa una nueva aproximación al tratamiento de las enfermedades neoplásicas, incluyendo aquéllas con múltiples alteraciones genómicas y mecanismos de resistencia (Etchin *et al*, Br J Haematol 2013 [7]; Etchin *et al*, Leukemia 2013 [8]; Shacham *et al*, Blood 2012 [9]).

Los hallazgos preliminares de estudios clínicos en curso han demostrado que Selinexor induce respuestas antitumorales duraderas en un amplio abanico de tumores sólidos y de cánceres hematológicos en recaída o refractarios, lo cual concuerda con su mecanismo de acción propuesto. En general, estos efectos parecen ser independientes del tipo de tumor o del tratamiento o tratamientos previos.

Hasta el 31 de marzo de 2017, 2.103 pacientes con tumores hematológicos o sólidos habían recibido al menos una dosis de selinexor en ensayos promovidos por compañías farmacéuticas (CSTs) o por los propios investigadores (ISTs), o en ensayos de uso compasivo. El programa de desarrollo clínico de selinexor incluye su valoración terapéutica en múltiples indicaciones en cáncer, para evaluar su amplio potencial en la terapia antineoplásica como agente único o en combinación. Estos 2.103 pacientes incluyen 1.412 de CSTs, 646 de ISTs y 45 de ensayos de uso compasivo. Los datos de

seguridad de todos los ensayos CST, IST y de uso compasivo son revisados por el promotor en las reuniones del Comité de Evaluación de la Seguridad, al menos mensualmente.

Los efectos secundarios no hematológicos de selinexor que se han visto hasta ahora en los pacientes muy pretratados son anorexia, astenia, náuseas y diarrea. Estos EAs son sobre todo de grados 1 y 2, y son más prevalentes en las cuatro primeras semanas de tratamiento, tras las cuales habitualmente se reducen y pueden mitigarse con los cuidados de soporte clásicos. El EA hematológico más común es la trombocitopenia, en relación con los recuentos de plaquetas basales y con las terapias previas; la interrupción de la administración y/o la reducción de dosis son útiles. La neutropenia es menos común, y responde clásicamente a factores de crecimiento estándares; y la anemia, aunque sí ocurre, no fuerza, por lo general, retrasos en la dosificación o ajustes en la dosis. No son habituales, con selinexor, ni la toxicidad acumulada ni las toxicidades mayores en órganos, y ha sido posible prolongar su administración durante más de un año.

En estos estudios de fase 1 de escalada de dosis, selinexor ha demostrado actividad antitumoral duradera, administrado como fármaco único en pacientes con múltiples tipos de tumores sólidos y cánceres hematológicos R/R, incluyendo el MM, a dosis  $\geq 6$  mg/m<sup>2</sup> por ASC. Además, los resultados en un número pequeño de pacientes (10) sugieren que selinexor, en combinación con dexametasona, posee una mayor eficacia en pacientes con MM R/R con respecto a Selinexor como agente único. El estudio STORM es un estudio de fase 2B que incluyó 79 pacientes, todos con enfermedad refractaria al último tratamiento, pero 48 de ellos “tetra-refractarios”, tratados previamente con bortezomib y carfilzomib [inhibidores del proteasoma (IPs)], y lenalidomida y pomalidomida [fármacos inmunomoduladores (IMiDs)], y refractarios al menos a un IP y a un IMiD, con una mediana de siete líneas previas de terapia (Vogl *et al*, presentado en 58ª Reunión Anual ASH 2016, San Diego [2]). Además, 31 pacientes eran “penta-refractarios”, incluyendo la falta de respuesta a los IPs e IMiDs previamente mencionados, pero no a anticuerpo monoclonal (AcMo) anti-CD38. El patrón de dosis incluía 80 mg de selinexor más dexametasona a baja dosis, 20 mg, cada fármaco dos veces por semana, administrados “tres semanas sí y una no” (seis dosis/ciclo), o continuamente (ocho dosis/ciclo). La tasa de respuesta global (TRG) fue del 21% en toda la cohorte, que se mantuvo en las subpoblaciones de pacientes tetra (21%) y penta-refractarios (20%). La eficacia no dependió de los dos diferentes patrones de administración del tratamiento. El perfil de toxicidad fue aceptable. La trombocitopenia fue el EA más frecuentemente documentado, siendo de grado 3 en el 25% de los pacientes, y de grado 4 en el 34%. Se observó astenia de grado 3 en el 15% de los pacientes, e hiponatremia de grado 3 en el 22%. Se requirió tratamiento de soporte con antieméticos, estimulantes del apetito, factores de crecimiento hematopoyético, agonistas del receptor de la trombopoyetina y suplementación con sal. En nuestro estudio, los pacientes serán

tratados con dexametasona, tanto para mejorar la tolerancia a selinexor como para aportar un beneficio extra en términos de eficacia. En estudios previos se ha visto que la dexametasona constituye un tratamiento profiláctico eficaz frente a los EAs habituales de selinexor descritos más arriba. Mientras que el MM no tratado es exquisitamente sensible a los glucocorticoides, este beneficio va menguando conforme se incrementa el tiempo en tratamiento, que con frecuencia incluye a los glucocorticoides en terapia de combinación. En los pacientes con MM muy pretratados no es probable que se observe respuesta al tratamiento solo con glucocorticoides, pero la Dexametasona debería ser capaz de aportar alivio sintomático de las toxicidades asociadas a selinexor, y podría inducir un incremento sinérgico de la eficacia en combinación con éste. Además, en nuestro estudio se va a añadir daratumumab, y su administración requiere premedicación con corticoesteroides.

Daratumumab es un AcMo humanizado IgG1 $\kappa$ , que se une con alta afinidad a un único epítipo de CD38. Se trata de una inmunoterapia específicamente dirigida a la citada diana, que ataca a las células tumorales que sobreexpresan CD38, una glicoproteína transmembrana, en una variedad de neoplasias hematológicas entre las que se encuentra el MM.

Daratumumab induce la lisis de células tumorales que expresan CD38, incluyendo las células tumorales de MM que han sido extraídas a partir de material fresco, a través de un amplio espectro de mecanismos que incluyen citotoxicidad dependiente del complemento (CDC), citotoxicidad celular mediada por anticuerpos (ADCC) y fagocitosis celular mediada por anticuerpos (FCDA), a través de la activación de proteínas del complemento, células *natural killer* (NK) y macrófagos (De Weers *et al*, J Immunol 2011; Overdijk *et al*, Mabs 2015). Además, se ha descrito también una acción inmunomoduladora debida al efecto de daratumumab sobre la depleción de células T reguladoras (T-regs), células B reguladoras (B-regs) y células supresoras derivadas de la línea mieloide (MDSC), lo cual conduce a una expansión oligoclonal de los linfocitos T activados, con consecuencias también sobre la carga tumoral.

Daratumumab se evaluó como fármaco único en los ensayos GEN501 y Sirius, en pacientes con MM muy pretratados, tras una mediana de cinco líneas previas de terapia que incluían IPs e IMiDs, y refractarios a la última línea de tratamiento o doblemente refractarios a ambos tipos de fármacos. El 31% de los pacientes respondió, pero la enfermedad se controló en hasta el 84%. La supervivencia libre de enfermedad (SLE) mediana fue de 4 meses, pero la supervivencia global (SG) mediana fue de 20,1 meses, mayor que la esperada en esta población de pacientes que, según los datos de Kumar y Usmani, no debería superar los 8 o 9 meses. El beneficio en SG se debió a los respondedores (en los cuales la SG mediana no se alcanzó), pero también a los pacientes en los que la enfermedad se estabilizó, lo cual dio como resultado una SG mediana de 18,5 meses para esta

población. Daratumumab satisfizo una necesidad médica pendiente hasta entonces, lo cual condujo a la FDA y a la EMA a aprobar su uso en monoterapia en pacientes con MM refractario o en recaída (Usmani *et al*, Blood 2016 [10]).

Por otro lado, existen numerosas pruebas que respaldan la eficacia y seguridad de Bortezomib para el tratamiento de pacientes con MM en recaída o refractario. Bortezomib está aprobado, para esta indicación, por la FDA y las Autoridades Reguladoras Europeas. La aprobación reguladora se basa, en parte, en los datos presentados por Richardson en 2003 (ensayo SUMMIT; Richardson *et al*, N Engl J Med 2003 [11]). En este ensayo, los investigadores trataron a 202 pacientes con mieloma en recaída que habían sido refractarios a la línea de terapia más reciente. Los pacientes recibieron hasta ocho ciclos de tratamiento con bortezomib, administrado dos veces por semana durante dos semanas consecutivas, seguidas por una semana de descanso. Se añadió dexametasona a los pacientes que exhibían una respuesta insuficiente a bortezomib como agente único. La TRG fue del 35% en esta fuertemente pretratada población, con una SG mediana de 16 meses. En el ensayo APEX se aleatorizó a los pacientes que habían experimentado de una a tres terapias previas anti-mieloma, bien a bortezomib, bien a dexametasona a alta dosis, como estrategia de rescate. Los pacientes pertenecientes a la cohorte de bortezomib exhibieron mayores tasas de respuesta [definida como respuesta parcial (RP) o mejor, 38% vs. 18%], un tiempo hasta la progresión (THP) más prolongado (189 días vs. 106 días), y una mayor SG tras un año (80% vs. 66%), que los pacientes aleatorizados a dexametasona a dosis alta (ensayo APEX; Richardson *et al*, N Engl J Med 2005 [12]). Los datos actualizados de este ensayo confirmaron el efecto beneficioso sobre la SG con una mediana de seguimiento de 22 meses (29,8 meses para bortezomib vs. 23,7 meses para dexametasona) (Richardson *et al*, Blood 2007 [13]). Además, la respuesta global (RG) mejoró cuando se evaluó tras un periodo de seguimiento más largo (con una mediana de seguimiento de 22 meses, el 43% de los pacientes respondió al tratamiento con bortezomib, superior al 38% que se había documentado inicialmente).

Posteriormente, la administración s.c. de bortezomib, frente a la convencional por vía i.v., demostró no ser inferior en términos de eficacia con un mejor perfil de seguridad, especialmente en términos de inducción de neuropatía periférica (Moreau P *et al*, Lancet Oncol 2011 [14]).

### **1.1 Estudios con bortezomib como apoyo para esta combinación**

Se ha combinado selinexor con bortezomib y dexametasona (SVd) en uno de los brazos del estudio de fase 1 STOMP, que se basa en el efecto sinérgico de ambos agentes a través de la retención en el núcleo de IκB y de la inhibición de la actividad transcripcional de NFκB, así como de la inducción de respuesta de estrés ribosomal (Turner *et al*, J Cancer 2013 [15]). Esta eficacia se ha observado

en estudios preclínicos, incluyendo el xenoinjerto tumoral con células U226PSR, resistente a IPs. Los pacientes incluidos en SVd eran pacientes con MM que habían recaído tras  $\geq 1$  terapia previa, y se permitía el tratamiento previo con bortezomib, siempre y cuando no hubiera existido refractariedad a este en la línea de terapia más reciente. Se incluyó a 22 pacientes en la fase de escalada, la mayor parte de los cuales se habían expuesto previamente a bortezomib (91%). El 73% eran refractarios a éste o a otros IPs. No se alcanzó la máxima dosis tolerada (MDT), y la dosis apropiada para la combinación incluyó la administración de selinexor a una dosis semanal de 100 mg, más bortezomib a una dosis semanal de 1,3 mg/m<sup>2</sup> (s.c.), durante cuatro o cinco semanas, más dexametasona a una dosis semanal de 40 mg. La TRG fue del 77% y todos los pacientes que no habían sido refractarios a IPs respondieron a esta combinación (n=7). 10 de los 15 pacientes previamente refractarios a IPs (67%) respondieron a esta combinación, incluyendo 14% de RC o mejor, y 13% de muy buena respuesta parcial (MBRP). El perfil de toxicidad fue aceptable y el efecto secundario de grado 3-4 que se documentó con más frecuencia fue la trombocitopenia de grado 3-4, que se vio en el 18% de los pacientes. Diarrea de grado 3, cansancio y dolor abdominal se observaron, cada uno de estos EAs, en el 6% de los pacientes (Bahlis *et al*, presentado en 21º Congreso EHA 2016, Copenhage [3]).

Por otro lado, daratumumab también se ha combinado con bortezomib y dexametasona (DVd) en un ensayo aleatorizado de fase 3, el estudio CASTOR, para compararlo con bortezomib y dexametasona (Vd) en pacientes con MM R/R tras al menos una línea previa de tratamiento. La población de pacientes no estaba tan pretratada como en el ensayo STOMP, y el número mediano de líneas previas de terapia era dos, pero la combinación de DVd se mostró significativamente mejor que Vd, y se alcanzó el punto final principal del ensayo tras una mediana de seguimiento de 7 meses. La supervivencia libre de progresión (SLP) mediana no se ha alcanzado todavía en la cohorte DVd, mientras que para la Vd fue de 7 meses (Palumbo *et al*, N Engl J Med 2016 [16]). La TRG, así como la tasa de RC, también fue significativamente mejor para DVd vs. Vd, y la FDA acaba de aprobar la combinación DVd para el tratamiento de los pacientes con MM R/R tras al menos una línea previa de terapia.

Nuevos datos del estudio CASTOR, con más de tres años de seguimiento, revelan que la combinación DVd mantiene una mejor supervivencia libre de progresión (SLP) y una mejor tasa de respuesta que la combinación Vd. El beneficio mayor se ha observado en pacientes con 1 línea de tratamiento previa: estos pacientes muestran una mayor SLP con DVd vs Vd independientemente de la exposición previa a lenalidomida (HR, 0.30) o bortezomib (HR, 0.22)

Además las respuestas observadas se muestran más estables y duraderas y los datos de seguridad no se han visto modificados en esta ampliación del periodo de observación.

En conclusión, los nuevos datos del estudio CASTOR sugieren que la combinación DVd debería administrarse a pacientes con MM R/R a partir de la primera recaída, independientemente de haber recibido previamente lenalidomida o bortezomib. [66]

Se ha relacionado a daratumumab con reacciones a la inyección. Teniendo en cuenta todos los estudios, 1 de cada 10 pacientes desarrolló alguna reacción asociada a la inyección, pero la mayor parte de ellas sucedieron en la primera administración, y fueron de grado 1 o 2. Pueden prevenirse con el uso de pre y post-medicación, así como con cuidados de soporte en caso de cualquier reacción. Debe destacarse que ningún paciente tratado con Daratumumab como fármaco único necesitó suspender el tratamiento por reacciones asociadas a su administración.

Teniendo en cuenta los antecedentes que se han expuesto, creemos que combinar selinexor más dexametasona con bortezomib y daratumumab (SVDd) es una opción atractiva para los pacientes con MM refractario o R/R, y nuestra hipótesis contempla un efecto sinérgico entre los tres fármacos más dexametasona, que poseerá una eficacia superior a la observada en las distintas combinaciones basadas en dos fármacos, selinexor más bortezomib y bortezomib más daratumumab.

## 2 MIELOMA MÚLTIPLE

El MM es una neoplasia hematológica que se caracteriza por la acumulación de células plasmáticas monoclonales en la médula ósea, la presencia de inmunoglobulina monoclonal o proteína M en suero u orina, enfermedad ósea, enfermedad renal e inmunodeficiencia. Es más común en los pacientes ancianos (la edad mediana al diagnóstico es 65-70 años; solo el 2% de los pacientes son menores de 40 años) (Raab *et al*, Lancet 2009 [17]).

El MM es la segunda neoplasia hematológica más común tras el linfoma no Hodgkin, y representa el 1% de todos los cánceres y el 2% de todas las muertes por cáncer. Con la terapia actual, la mediana de supervivencia es de 5,2 años tras el diagnóstico (Kumar *et al*, Leukemia 2014 [18]).

Durante más de 30 años, la proteína M, producida por células plasmáticas monoclonales en proliferación, ha sido considerada como un biomarcador de la presencia y alcance de la enfermedad. Recientemente, la determinación de unos fragmentos de la proteína M, las CLLs, se han usado como biomarcador adicional en una subpoblación de pacientes con MM (Raab *et al*, Lancet 2009 [17]).

Aunque se desconoce la causa del MM, en los pacientes con esta enfermedad se han visto mutaciones en una serie de genes concretos con una frecuencia significativa. Se observan mutaciones en NRAS, KRAS, TP53 y BRAF, bien conocidas por ser desencadenantes de la oncogénesis en otros cánceres (Lohr *et al*, Cancer Cell 2014 [19]), y mutaciones en muchos genes asociados con la activación de NFkB (Keats *et al*, Cancer Cell 2007 [20]). Asimismo, algunos factores de riesgo hacen a los pacientes más susceptibles a esta enfermedad. El MM es más frecuente en los individuos por encima de 65 años, en el sexo masculino, y en aquéllos con miembros de su familia afectados por esta patología. El 50% de los pacientes con MM portan mutaciones en el locus de la cadena pesada de las inmunoglobulinas, en el cromosoma 14 (14q32), pérdida total o parcial del cromosoma 13, y pérdida parcial del cromosoma 17 (Raab *et al*, Lancet 2009 [17]; Kyle *et al*, N Engl J Med 2004 [21]).

El diagnóstico de MM se basa en las características fundamentales de la enfermedad, ocupación de la cavidad de la médula ósea, la presencia de lesiones óseas ocupantes de espacio, y la producción de paraproteína (Raab *et al*, Lancet 2009 [17]; *International Myeloma Working Group*, the Lancet Oncology 2014 [22]). Los criterios diagnósticos se describen en el Apéndice 9. El estadiaje del MM se basa en el nivel de  $\beta_2$ -microglobulina, que correlaciona directamente con la función renal, masa tumoral y nivel de albúmina (Greipp *et al*, J Clin Oncol 2005 [23]). Los estadios se describen en el Apéndice 2.

El tratamiento del MM ha mejorado en los últimos 20 años debido al uso de quimioterapia de dosis alta y al trasplante de células madre autólogas, la posterior introducción de IMiDs como talidomida, lenalidomida y pomalidomida, y los IPs bortezomib y carfilzomib. Sin embargo, a pesar de la mayor eficacia de estos agentes de primera línea, la mayor parte de pacientes finalmente recaerá y se transformará en resistente a los fármacos. Aunque se está empleando una amplia variedad de nuevos medicamentos en pacientes en R/R, estos continúan necesitando la llegada de terapias capaces de mejorar la tasa de supervivencia global.

### **3 EXPORTACIÓN NUCLEAR**

#### **3.1 Inhibición de XPO1 en cáncer humano**

Se ha identificado a muchas PSTs como importantes en la patogénesis del cáncer, incluyendo (aunque no limitadas a) TP53, FOXO3a, IkB, BRCA1, APC, PP2A y Rb (Turner *et al*, Biochem Pharmacol 2012 [24]; Senapedis *et al*, Semin Cancer Biol 2014 [25]; Sharpless *et al*, Nature 2007 [26]; Tan *et al*, Cancer Discov 2014 [27]; Yang *et al*, PLoS One 2014 [28]). Las PSTs participan en vías de supresión tumoral asumiendo una serie de funciones que incluyen el reconocimiento del daño

celular, la detención del ciclo celular hasta que hayan concluido las reparaciones, y la inducción de apoptosis en células en estadios en los que no cabe la reparación (Brown *et al*, PLoS One 2011 [29]).

Para que estas proteínas lleven a cabo sus actividades supresoras de tumores y antineoplásicas, se requiere su presencia en el núcleo. Por el contrario, la exportación fuera del núcleo mediada por la proteína lanzadera de exportación nuclear XPO1, puede inactivar sus capacidades para regular procesos celulares (Golomb *et al*, Mol Cell 2012 [30]; Xu *et al*, Curr Opin Struct Biol 2010 [31]), y las células tumorales se aprovechan de estas funciones para evadir exitosamente tanto los controles normales de daño del ADN como las terapias antineoplásicas (Turner *et al*, Curr Med Chem 2008 [32]). Debe destacarse que, mediante un análisis no sesgado, de alta capacidad con ARN de silenciamiento (siARN), se ha identificado a XPO1 como un gen asociado a la supervivencia en MM (Tiedemann *et al*, Cancer Res 2012 [33]). Este gen se encuentra habitualmente sobreexpresado en el MM (Tai *et al*, Leukemia 2014 [34]).

El bloqueo de XPO1 motiva una retención nuclear transitoria de las PSTs y de otros moduladores del crecimiento, restableciendo sus efectos supresores del tumor y sobre la regulación del crecimiento de las células cancerosas, y potencialmente revirtiendo los mecanismos que conducen a la resistencia a la quimioterapia (lo cual encierra posibles futuras implicaciones para las terapias de combinación) (Lain *et al*, Exp Cell Res 1999 [35]; Turner *et al*, J Cancer 2013 [15]; Turner *et al*, Semin Cancer Biol 2014 [36]). En las células normales, la inhibición de XPO1 detiene temporalmente el ciclo celular sin citotoxicidad, y dichas células se recuperan cuando se retira el inhibidor (Lain *et al*, Exp Cell Res 1999 [35]; Van der Watt *et al*, Int J Cancer 2009 [37]; Gray *et al*, Int J Cancer 2007 [38]). En los ensayos clínicos iniciales, varias tentativas de desarrollar este tipo de fármacos anti-cáncer fracasaron debido a los efectos de estos agentes “lejos de su objetivo”, que condujeron a significativas pérdidas de peso, diarrea, y a unas notables fatiga y astenia (Mutka *et al*, Cancer Res 2009 [39]; Newlands *et al*, Br J Cancer 1996 [40]; Roberts *et al*, Cancer Chemoter Pharmacol 1986 [41]).

Ahora se acepta que la retención nuclear forzada de las PSTs puede contrarrestar los efectos de una multitud de vías oncogénicas, estimuladoras del crecimiento e inflamatorias, que perpetúan el fenotipo neoplásico. Dado que el restablecimiento de la actividad PST y la reducción de señales oncogénicas son relevantes esencialmente en cualquier tipo de cáncer, se espera que la inhibición de XPO1 posea un efecto sobre el MM y sobre otras muchas neoplasias (Tabla 2, Figura 1) (Zhang *et al*, Exp Hematol 2013 [42]).

Tabla 2. Efecto de la inhibición de XPO1 sobre vías oncogénicas e inflamatorias

| Vía afectada                  | Efecto de la inhibición de XPO1               | Referencia                                                           |
|-------------------------------|-----------------------------------------------|----------------------------------------------------------------------|
| Mutación de p53               | Activación de p73 y p21                       | Ranganathan <i>et al</i> , 2012 [43]                                 |
| Activación de MDM2            | Retención nuclear, y activación, de p53       | Kojima <i>et al</i> , 2013 [44]                                      |
| Sobreexpresión de XPO1        | Reducción de XPO1                             | Walker <i>et al</i> , 2013 [45]                                      |
| Amplificación de c-Myc        | Reducción de la proteína MYC                  | Schmidt <i>et al</i> , 2013 [46]                                     |
| Mutación de NPM1              | Restauración de NPM1 nuclear                  | Falini <i>et al</i> , 2007 [47]                                      |
| Regulación a la baja de CEBPA | Retención nuclear y activación                | Ranganathan <i>et al</i> , 2012 [43]                                 |
| Reducción de CDKN2A           | Estabilización de p53/p73                     | Azmi <i>et al</i> , 2013 [48]                                        |
| Reducción de Rb               | Hipofosforilación de Rb, elevación de p14/p16 | Fragomeni <i>et al</i> , 2013 [49]; Gaubatz <i>et al</i> , 2001 [50] |
| Activación de FLT3            | Reducción de FLT3                             | Ranganathan <i>et al</i> , 2012 [43]                                 |
| Activación de c-KIT           | Reducción de c-KIT                            | Ranganathan <i>et al</i> , 2012 [43]                                 |
| Activación de NF-KB           | Retención nuclear, y activación, de IKB       | Lapalombella <i>et al</i> , 2012 [51]                                |
| Activación de PIK3 o AKT      | Activación de FOXO1, 3, 4                     | Lapalombella <i>et al</i> , 2012 [51]                                |
| Survivina – citoplásmica      | Retención nuclear de survivina                | Altura <i>et al</i> , 2003 [52]                                      |
| Activación de Bcr-Abl         | Activación de PP2A                            | Walker <i>et al</i> , 2013 [45]                                      |

Figura 1 Exportación nuclear de proteínas por XPO1, con secuencias de exportación nuclear (NES)

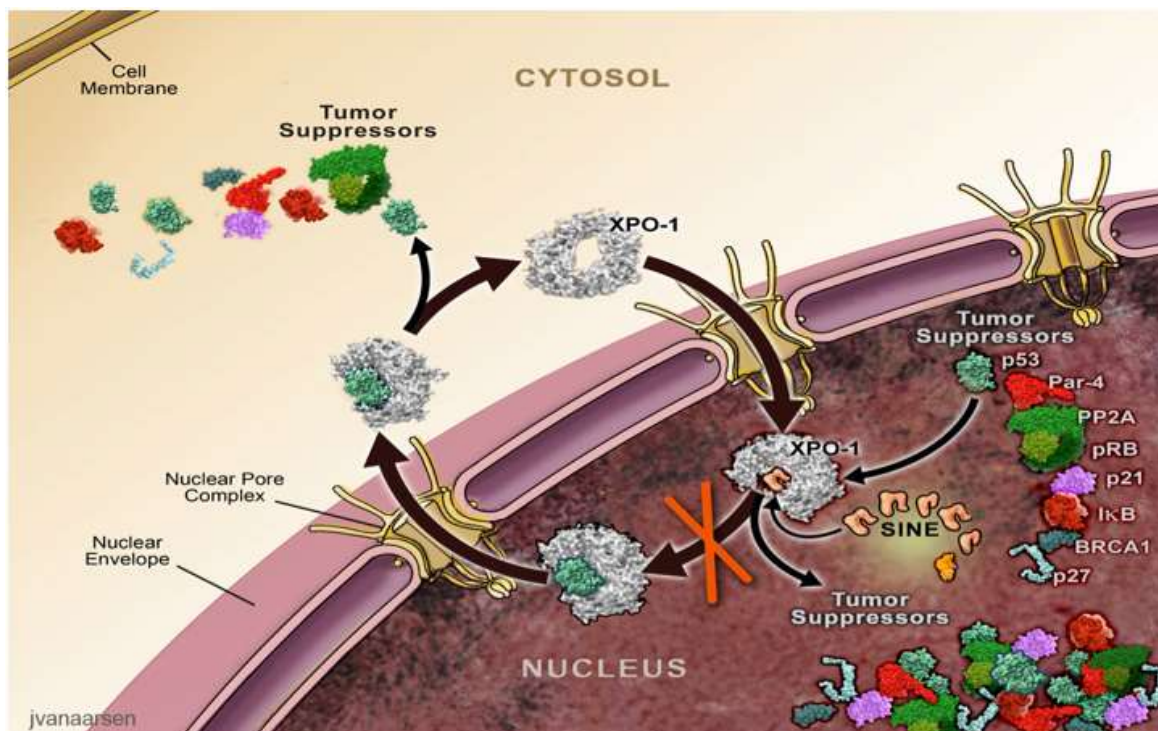

### 3.2 Anticuerpos monoclonales en mieloma

Hasta hace poco, las terapias con AcMo no habían sido exitosas en el tratamiento del MM. Con la introducción de rituximab, un AcMo humanizado frente a CD20, como el primer AcMo aprobado por la FDA para el tratamiento del linfoma en 1997, la comunidad oncológica ha podido observar resultados destacables sobre un abanico de neoplasias hematológicas. Desafortunadamente, en lo que respecta al MM, dos estudios de fase 2 con rituximab mostraron TRGs de tan solo el 0%-5%. El motivo de este hallazgo se atribuyó a que solo una pequeña parte de los clones MM expresaban el antígeno diana, CD20. De todos modos, se descubrió que incluso en esa minoría de casos que presentaban una positividad densa para CD20, las respuestas seguían siendo pobres.

Elotuzumab es un AcMo IgG1 humanizado cuya diana es CS-1, una glicoproteína de la superficie celular altamente expresada en las células plasmáticas malignas. Se ha visto que la interacción de este AcMo con la citada diana conduce a CCDA mediada por células NK. Se han llevado a cabo ensayos clínicos que han combinado elotuzumab con lenalidomida y dexametasona en pacientes con mieloma en recaída. Los resultados de un estudio de fase 1/2 han sido alentadores, con un 90% de pacientes llegando a RP, y una SLP de casi 3 años (Richardson *et al*, Lancet Haematol 2015 [53]). Se ha publicado recientemente un estudio de fase 3 que confirma que elotuzumab, añadido a lenalidomida y dexametasona, prolonga significativamente la SLP en comparación con lenalidomida

más dexametasona (Dimopoulos *et al*, Br J Haematol 2017 [54]). Sin embargo, es importante resaltar que no existen ensayos que demuestren la eficacia de elotuzumab como fármaco único, y que, en un estudio de 2012, de Fase 1, de escalado de dosis, no se pudo demostrar una respuesta objetiva (Zonder *et al*, Blood 2012 [55]).

CD38 es otro antígeno presente en la superficie de las células plasmáticas. Existen al menos cuatro AcMo dirigidos frente a CD38 en MM. CD38 está implicado en la regulación de la adhesión celular participando en vías de señalización intracelular mediadas por receptor. Su otra función la ejerce como ectoenzima, catalizando el metabolismo de adenosina-difosfato-ribosa cíclica y nicotín-adenín-dinucleótido fosfato. Este metabolismo es fundamental en la regulación del calcio como mensajero en el retículo endoplásmico y en sus depósitos lisosomales. Además, la señalización vía CD38 también incluye la interacción con los complejos receptores de antígeno en las células T y B, la movilización y secreción de IgG1 y la activación de las células NK.

## **4 SELINEXOR (KPT-330), DARATUMUMAB, BORTEZOMIB**

Toda la información referente a los fármacos que se emplean en este ensayo se encuentra profusamente detallada en los respectivos Manuales del Investigador, que se van actualizando a lo largo del periodo que comprende el estudio [56].

## **5 OBJETIVOS DEL ESTUDIO**

### **5.1 Objetivo principal**

El objetivo principal del ensayo es evaluar la eficacia de la combinación de selinexor, bortezomib y dexametasona más daratumumab (SDVd), en términos de  $\geq$  Respuestas Completas, incluyendo Respuesta Completa estricta (RCe) y Respuesta Completa (RC), según los criterios del IMWG.

### **5.2 Objetivos secundarios**

- Evaluar la eficacia en términos de tasa global de respuestas, de acuerdo con los criterios del International Myeloma Working Group (IMWG), incluyendo las diferentes categorías de respuestas y la tasa de enfermedad mínima residual negativa.
- Determinar la seguridad de la combinación y la tolerancia a la misma, a juzgar por la incidencia de toxicidades clínicas y toxicidades relacionadas con los parámetros de laboratorio.
- Determinar las variables relativas al tiempo hasta los eventos: TTP, DR, SLP y SG.

### 5.3 Objetivos exploratorios

Determinar la respuesta y el pronóstico a la vista de:

- Marcadores pronóstico analizados por hibridación *in situ* fluorescente (FISH), incluyendo del17p, t(4;14), t(14;16), 1q+, 1p-, y evaluando si estas anomalías citogenéticas se encontraban ya presentes en el momento del diagnóstico, o se adquirieron en el momento de la progresión de la enfermedad (PE).
- También se valorará el pronóstico según la profundidad de la respuesta:

El objetivo de llevar a cabo estudios longitudinales de RNA-seq en células tumorales, es doble: 1) basalmente, para comparar los transcriptomas entre la quimio-refractariedad primaria (no respuesta) vs. quimiorresistencia (menos que RC) vs. pacientes quimiosensibles (RC); 2), para entender la huella molecular de las células tumorales quimiorresistentes vs. basales. Además, el estudio de RNAseq permitirá evaluar la expresión de XPO1 y revisar su relación con la eficacia del protocolo, que incluye un fármaco íntimamente relacionado con esta proteína. El mismo análisis realizado en las células efectoras inmunes servirá para entender cómo el esquema propuesto modula tales células.

## 6 DISEÑO DEL ESTUDIO

### 6.1 Compendio del diseño del estudio

Este es un estudio de fase 2 de un solo brazo, sin enmascaramiento, no aleatorizado, multicéntrico, del SINE™ selinexor, más dexametasona a baja dosis, en combinación con bortezomib y daratumumab.

Se reclutará a 57 pacientes con MM refractario o R/R que satisfagan los criterios de elegibilidad y no cumplan ninguno de los criterios de exclusión, para recibir SVDd hasta que se produzca la PE o hasta que el paciente presente intolerancia al tratamiento.

Cada ciclo tendrá una duración de 5 semanas. Los pacientes reclutados recibirán una dosis fija de 60 mg de selinexor por vía oral (los días 1, 8, 15 y 22), más 40 mg de dexametasona (20 mg v.o. el día de daratumumab y selinexor, y 20 mg v.o. el día posterior a daratumumab y selinexor), ambos semanalmente como terapia continua.

Bortezomib se administrará por vía subcutánea a una dosis de 1,3 mg/m<sup>2</sup> una vez a la semana los días 1, 8, 15 y 22 desde el Ciclo 1 al Ciclo 8, y los días 1 y 15 de cada ciclo en lo sucesivo, como terapia continua.

Daratumumab se administrará por vía subcutánea a una dosis total de 1800 mg, semanalmente durante los ciclos 1 y 2 (los días 1, 8, 15 y 22), cada dos semanas del Ciclo 3 al Ciclo 6 (los días 1 y 15), y el Día 1 de cada ciclo en lo sucesivo (Q5W), como terapia continua.

La 5ª semana de cada ciclo, el paciente no recibirá tratamiento de estudio.

Los pacientes podrán continuar el tratamiento indefinidamente y no se contempla una duración máxima del tratamiento.

### Esquema de tratamiento

El lunes es un ejemplo, y no es obligatorio comenzar el tratamiento un lunes.

|           | <b>Ciclo 1 y Ciclo 2</b>          | <b>Lun</b> | <b>Mar</b> | <b>Miér</b> | <b>Jue</b> | <b>Vier</b> | <b>Sáb</b> | <b>Dom</b> |
|-----------|-----------------------------------|------------|------------|-------------|------------|-------------|------------|------------|
| 1ª semana | Dexa 20 mg                        | X (IV)     | X (VO)     |             |            |             |            |            |
|           | Dara 1800mg SC                    | X          |            |             |            |             |            |            |
|           | Selinexor 60 mg VO                | X          |            |             |            |             |            |            |
|           | Bortezomib 1,3 mg/m2 SC           | X          |            |             |            |             |            |            |
| 2ª semana | Dexa 20 mg                        | X (IV)     | X (VO)     |             |            |             |            |            |
|           | Dara 1800mg SC                    | X          |            |             |            |             |            |            |
|           | Selinexor 60 mg VO                | X          |            |             |            |             |            |            |
|           | Bortezomib 1,3 mg/m2 SC           | X          |            |             |            |             |            |            |
| 3ª semana | Dexa 20 mg                        | X (IV)     | X (VO)     |             |            |             |            |            |
|           | Dara 1800 mg SC                   | X          |            |             |            |             |            |            |
|           | Selinexor 60 mg VO                | X          |            |             |            |             |            |            |
|           | Bortezomib 1,3 mg/m2 SC           | X          |            |             |            |             |            |            |
| 4ª semana | Dexa 20 mg                        | X (IV)     | X (VO)     |             |            |             |            |            |
|           | Dara 1800mg SC                    | X          |            |             |            |             |            |            |
|           | Selinexor 60 mg VO                | X          |            |             |            |             |            |            |
|           | Bortezomib 1,3 mg/m2 SC           | X          |            |             |            |             |            |            |
| 5ª semana | Sin administración de tratamiento | NA         | NA         | NA          | NA         | NA          | NA         | NA         |

Dexa, dexametasona; Dara, daratumumab; IV, vía intravenosa; VO, vía oral; SC, vía subcutánea.

|                          | <b>Ciclos 3 al 6</b>                | <b>Lun</b> | <b>Mar</b> | <b>Miér</b> | <b>Jue</b> | <b>Vier</b> | <b>Sáb</b> | <b>Dom</b> |
|--------------------------|-------------------------------------|------------|------------|-------------|------------|-------------|------------|------------|
| 1 <sup>a</sup><br>semana | Dexa 20 mg                          | X (IV)     | X (VO)     |             |            |             |            |            |
|                          | Dara 1800mg SC                      | X          |            |             |            |             |            |            |
|                          | Selinexor 60 mg VO                  | X          |            |             |            |             |            |            |
|                          | Bortezomib 1,3 mg/m <sup>2</sup> SC | X          |            |             |            |             |            |            |
| 2 <sup>a</sup><br>semana | Dexa 40 mg VO                       | X          |            |             |            |             |            |            |
|                          | Selinexor 60 mg VO                  | X          |            |             |            |             |            |            |
|                          | Bortezomib 1,3 mg/m <sup>2</sup> SC | X          |            |             |            |             |            |            |
| 3 <sup>a</sup><br>semana | Dexa 20 mg                          | X (IV)     | X (VO)     |             |            |             |            |            |
|                          | Dara 1800 mg SC                     | X          |            |             |            |             |            |            |
|                          | Selinexor 60 mg VO                  | X          |            |             |            |             |            |            |
|                          | Bortezomib 1,3 mg/m <sup>2</sup> SC | X          |            |             |            |             |            |            |
| 4 <sup>a</sup><br>semana | Dexa 40 mg VO                       | X          |            |             |            |             |            |            |
|                          | Selinexor 60 mg VO                  | X          |            |             |            |             |            |            |
|                          | Bortezomib 1,3 mg/m <sup>2</sup> SC | X          |            |             |            |             |            |            |
| 5 <sup>a</sup><br>semana | Sin administración de tratamiento   | NA         | NA         | NA          | NA         | NA          | NA         | NA         |

Dexa, dexametasona; Dara, daratumumab; IV, vía intravenosa; VO, vía oral; SC, vía subcutánea.

|                          | <b>Ciclo 7 al Ciclo 8</b>           | <b>Lun</b> | <b>Mar</b> | <b>Miér</b> | <b>Jue</b> | <b>Vier</b> | <b>Sáb</b> | <b>Dom</b> |
|--------------------------|-------------------------------------|------------|------------|-------------|------------|-------------|------------|------------|
| 1 <sup>a</sup><br>semana | Dexa 20 mg                          | X (IV)     | X (VO)     |             |            |             |            |            |
|                          | Dara 1800 mg SC                     | X          |            |             |            |             |            |            |
|                          | Selinexor 60 mg VO                  | X          |            |             |            |             |            |            |
|                          | Bortezomib 1,3 mg/m <sup>2</sup> SC | X          |            |             |            |             |            |            |
| 2 <sup>a</sup><br>semana | Dexa 40 mg VO                       | X          |            |             |            |             |            |            |
|                          | Selinexor 60 mg VO                  | X          |            |             |            |             |            |            |
|                          | Bortezomib 1,3 mg/m <sup>2</sup> SC | X          |            |             |            |             |            |            |
| 3 <sup>a</sup><br>semana | Dexa 40 mg VO                       | X          |            |             |            |             |            |            |
|                          | Selinexor 60 mg VO                  | X          |            |             |            |             |            |            |
|                          | Bortezomib 1,3 mg/m <sup>2</sup> SC | X          |            |             |            |             |            |            |
| 4 <sup>a</sup><br>semana | Dexa 40mg VO                        | X          |            |             |            |             |            |            |
|                          | Selinexor 60 mg VO                  | X          |            |             |            |             |            |            |

|           |                                     |    |    |    |    |    |    |    |
|-----------|-------------------------------------|----|----|----|----|----|----|----|
|           | Bortezomib 1,3 mg/m <sup>2</sup> SC | X  |    |    |    |    |    |    |
| 5ª semana | Sin administración de tratamiento   | NA |

Dexa, dexametasona; Dara, daratumumab; IV, vía intravenosa; VO, vía oral; SC, vía subcutánea.

|           | <b>Ciclo 9 en adelante</b>                                                                 | <b>Lun</b>            | <b>Mar</b> | <b>Miér</b> | <b>Jue</b> | <b>Vier</b> | <b>Sáb</b> | <b>Dom</b> |
|-----------|--------------------------------------------------------------------------------------------|-----------------------|------------|-------------|------------|-------------|------------|------------|
| 1ª semana | Dexa 20 mg<br>Dara 1800 mg SC<br>Selinexor 60 mg VO<br>Bortezomib 1,3 mg/m <sup>2</sup> SC | X (IV)<br>X<br>X<br>X | X (VO)     |             |            |             |            |            |
| 2ª semana | Dexa 40 mg VO<br>Selinexor 60 mg VO                                                        | X<br>X                |            |             |            |             |            |            |
| 3ª semana | Dexa 40 mg VO<br>Selinexor 60 mg VO<br>Bortezomib 1,3 mg/m <sup>2</sup> SC                 | X<br>X<br>X           |            |             |            |             |            |            |
| 4ª semana | Dexa 40 mg VO<br>Selinexor 60 mg VO                                                        | X<br>X                |            |             |            |             |            |            |
| 5ª semana | Sin administración de tratamiento                                                          | NA                    | NA         | NA          | NA         | NA          | NA         | NA         |

Dexa, dexametasona; Dara, daratumumab; IV, vía intravenosa; VO, vía oral; SC, vía subcutánea.

Se seguirá a los pacientes el mayor tiempo posible, o hasta la PE o hasta la muerte.

La dexametasona (40 mg) se administrará con cada dosis de selinexor. La dexametasona se administrará en forma de comprimido, y deberá ser proporcionada por el propio centro. Los días en los que deba administrarse daratumumab, se dividirá la dosis de dexametasona administrando 20 mg que se darán por vía oral ese mismo día, como parte de la medicación pre-daratumumab requerida, y los otros 20 mg al día siguiente, por vía oral. Para los pacientes con intolerancia parcial a los glucocorticoides, la dosis mínima permitida de dexametasona será de 10 mg. Daratumumab

se administrará mediante una inyección subcutánea, cuyos detalles se especificarán en la sección correspondiente.

Para reducir los efectos secundarios asociados a selinexor, es opcional el uso de olanzapina 2,5 mg vo diariamente desde el C1D1 y se irá reduciendo la dosis a criterio del investigador a partir del ciclo 2.

Los pacientes recibirán también el mejor cuidado de soporte (MCS) para mitigar los efectos secundarios asociados a selinexor y daratumumab, incluyendo transfusiones de productos sanguíneos, antibióticos si se requirieran, y (cuando sea procedente) factores de crecimiento, incluyendo factores estimulantes de colonias de granulocitos para la neutropenia, y eritropoyetinas para la anemia.

El investigador podrá dejar de administrar el tratamiento en estudio a un paciente aplicando los criterios descritos en la Sección 16.2. Los pacientes podrán decidir suspender el tratamiento en estudio por cualquier motivo. A los que elijan dejar de recibir el tratamiento se les animará a continuar en el estudio, de tal modo que se pueda obtener información del seguimiento de la PE, de otras terapias antineoplásicas, de síntomas y del estatus de supervivencia. Sin embargo, los pacientes podrán optar por retirar su consentimiento y declinar cualquier participación en el ensayo a partir de ese momento o en cualquier otro.

El investigador deberá determinar la razón principal de la interrupción del tratamiento en estudio en cada paciente, y almacenar dicha información en el cuaderno electrónico de recogida de datos (eCRD). Los pacientes que interrumpan prematuramente el tratamiento en estudio no podrán ser reclutados para reiniciar más adelante dicho tratamiento con arreglo a este protocolo.

## **6.2 Comisión de Monitorización de la Seguridad y de los Datos**

Al ser ésta una nueva combinación, un comité interno de revisión llevará a cabo un análisis de seguridad una vez que los primeros seis pacientes hayan completado los dos primeros ciclos. El reclutamiento estará cerrado durante este proceso, y se escribirá un informe de seguridad indicando si los siguientes pacientes pueden continuar sin riesgo con el esquema previsto, o si se requiere un ajuste de dosis.

La Comisión de Monitorización de la Seguridad y de los Datos (CMSD) estará integrada por investigadores *senior* e independientes de PETHEMA que no participen en el ensayo. El presidente del CMSD aportará un informe de seguridad con la recomendación de la continuación del estudio, o bien la continuación con modificaciones o su terminación.

Además, una vez que se haya completado el reclutamiento del estudio se llevará cabo un segundo análisis provisional, para que los coordinadores clínicos y el representante del promotor evalúen la eficacia y la seguridad.

## **7 SELECCIÓN DE PACIENTES**

### **7.1 Número de pacientes**

Se reclutará a, aproximadamente, 57 pacientes con MM refractario o R/R que reúnan todos los criterios de elegibilidad y no cumplan ninguno de los criterios de exclusión.

### **7.2 Reclutamiento**

Se espera que el periodo de reclutamiento de este estudio sea de, aproximadamente, 18 meses. Este estudio se llevará a cabo en, aproximadamente, 15 centros en España.

La estimación del cronograma global para este ensayo se ajusta a las siguientes fechas límite:

Primera visita del primer paciente (FPFV): Julio de 2018

Última inclusión de un paciente: Febrero de 2021.

Última visita del último paciente (LPLV): Febrero 2024

### **7.3 Criterios de inclusión**

Para poder ser reclutados para este estudio, los pacientes deben cumplir todos los criterios de inclusión descritos a continuación:

1. El paciente, en opinión del investigador, quiere cumplir todos los requerimientos del protocolo y es capaz de hacerlo.
2. Antes de la realización de cualquier actividad relacionada con el estudio que no forme parte de los cuidados médicos habituales, el paciente ha otorgado voluntariamente consentimiento informado, y comprende que puede retirar dicho consentimiento en cualquier momento, sin perjuicio con respecto a sus cuidados médicos futuros.
3. El paciente debe tener al menos 18 años de edad.
4. El paciente debe tener un diagnóstico confirmado de MM sintomático y enfermedad secretora medible, definida como proteína monoclonal en suero  $\geq 0,5$  g/dL o proteína monoclonal (cadenas

ligeras) en orina  $\geq 200$  mg/24 h. En los pacientes en los que la enfermedad se determine mediante CLLs en suero, el valor de CLL deberá ser  $\geq 10$ mg/dL, con un cociente kappa/lambda sérico alterado.

5. El paciente deberá tener un valor de 0, 1 o 2 en la escala ECOG

6. Ha recibido al menos una línea previa de tratamiento: Inducción seguida de trasplante autólogo y terapia de consolidación/ mantenimiento se considerará como un régimen anti-MM.

El paciente debe haber alcanzado al menos una respuesta parcial a alguna de las líneas de tratamiento previas y haber demostrado progresión durante o después de la última línea de tratamiento.

7. Se permite el tratamiento previo con bortezomib u otro inhibidor de proteasoma (IP), siempre y cuando se cumplan los siguientes criterios:

- La mejor respuesta obtenida con bortezomib tras cualquier tratamiento anterior fue  $\geq$  RP y con el último IP (la terapia con IP sola o en combinación) fue  $\geq$  RP, Y
- El participante no suspendió bortezomib debido a toxicidad relacionada con el tratamiento de grado  $\geq 3$ , Y
- Debe haber tenido al menos un intervalo de 6 meses sin tratamiento con IP antes del ciclo 1 (C1D1) del presente ensayo

8. El paciente presenta los siguientes valores de laboratorio dentro de los 14 días previos a la Visita Basal (Día 1 del Ciclo 1, antes de la administración del fármaco en estudio): recuento de plaquetas  $\geq 100 \times 10^9$ /L, hemoglobina  $\geq 8,5$  g/dL, y recuento absoluto de neutrófilos (RAN)  $\geq 1,5 \times 10^9$ /L; se podrían aceptar valores más bajos si éstos se debieran, claramente, a la afectación medular por MM (RAN  $\geq 1,0 \times 10^9$ /L y plaquetas  $\geq 75 \times 10^9$ /L si la infiltración en médula ósea  $>50\%$ ). Los pacientes que estén recibiendo factores de crecimiento hematopoyético, incluyendo eritropoyetina (EPO), darbepoetina o factores estimuladores de colonias de granulocitos (G-CSF), pueden continuar con dichas medidas de soporte.

9. Calcio sérico corregido  $<14$  mg/dL.

10. Tanto AST como ALT deben ser menores o igual a 2,5 veces su límite superior de normalidad, y la bilirrubina total debe ser menor o igual a dos veces su límite superior de normalidad.

11. El cálculo del aclaramiento de creatinina (CrCl) debe ser  $\geq 20$  mL/minuto, cálculo que se realizará según la fórmula de Cockcroft y Gault:

$$(140 - \text{edad}) \cdot \text{peso (kg)} / (72 \cdot \text{creatinina (mg/dL)})$$

El resultado debe multiplicarse por 0,85 en las mujeres, y el CrCl debe ser >20 mL/minuto si se mide en muestras de orina de 24 horas.

12. Las mujeres fértiles deben utilizar un método de control de natalidad altamente efectivo de acuerdo con las normativas locales de uso de métodos de control del embarazo para personas que participen en estudios clínicos: por ejemplo, el uso implantado de métodos de contracepción hormonales por vía oral, de inyección o implante; colocación de un dispositivo intrauterino o un sistema intrauterino; métodos de barrera: preservativo con espermicida espuma/gel/película/crema/supositorio; esterilización de la pareja masculina (la pareja vasectomizada debe ser la única pareja de la mujer); o abstinencia real (cuando esta sea coherente con las preferencias y estilo de vida habitual). Los métodos de anticoncepción deberán mantenerse durante y después del estudio, (tres meses después de la última dosis de cualquier componente del tratamiento).

13. Una mujer en edad reproductiva debe tener una prueba de embarazo negativa durante el proceso de reclutamiento, entre 10-14 días y 24 horas antes del comienzo del tratamiento. Las mujeres con potencial reproductivo deben comprometerse bien a abstenerse en todo momento de mantener relaciones sexuales heterosexuales; o a usar dos métodos de contracepción fiables simultáneamente.

#### **7.4 Criterios de exclusión**

Los pacientes que cumplan cualquiera de los siguientes criterios de exclusión no son seleccionables para el estudio:

1. El paciente ha recibido tratamiento previo con selinexor
2. El paciente ha recibido tratamiento previo con daratumumab o cualquier otro anticuerpo monoclonal dirigido frente a CD38.
3. El paciente es refractario a bortezomib u otro IP, como ixazomib y carfilzomib (tuvo una progresión de la enfermedad en tratamiento -al recibir la terapia con el IP-, o dentro de los 60 días posteriores a la finalización de la terapia con bortezomib u otro IP, como ixazomib y carfilzomib.
4. El sujeto posee en la actualidad un diagnóstico de leucemia de células plasmáticas, amiloidosis primaria, gammapatía monoclonal de significado indeterminado (GMSI) o MM quiescente (MMq).
5. El sujeto ha recibido previamente un trasplante autólogo de progenitores hematopoyéticos dentro de las doce semanas anteriores al Día 1 del Ciclo 1, o ha recibido otro tratamiento anti-mieloma dentro de las dos semanas antes del Día 1 del Ciclo 1 (con la excepción del uso de

emergencia de un curso corto [cuatro días como máximo de dexametasona 40 mg/día o equivalente] de corticosteroides).

6. El sujeto ha recibido previamente un trasplante alogénico de progenitores hematopoyéticos dentro del último año, o incluso antes si existen evidencias de enfermedad injerto contra huésped activa.

7. El sujeto padece neuropatía periférica o dolor por neuropatía de grado 2 o mayor, según se especifica en la Versión 5 de los Criterios Comunes de Terminología para Eventos Adversos del *National Cancer Institute* (NCI CTCAE).

8. El sujeto ha padecido previamente, o padece de forma concurrente, cualquier neoplasia invasiva (distinta del mieloma) dentro de los cinco años previos al inicio del estudio, excepto:

carcinoma basocelular o de células escamosas de la piel, carcinoma *in situ* de cérvix, adenocarcinoma de próstata localizado diagnosticado hace tres años o más y sin evidencia de fracaso bioquímico, u otro cáncer por el cual el sujeto haya sido sometido a terapia potencialmente curativa y del que no exista evidencia de tal enfermedad al menos durante los últimos cinco años.

9. El sujeto ha recibido radioterapia dentro de los 14 días previos al Día 1 del Ciclo 1.

10. El sujeto presenta implicación meníngea del MM.

11. El sujeto padece EPOC severa (definida como un volumen espiratorio forzado en el primer segundo [FEV<sub>1</sub>] inferior al 60% del predicho como normal), asma persistente o una historia de asma severo dentro de los últimos cinco años. Los sujetos con EPOC o asma, documentados o en sospecha, deberán someterse a un test de volumen espiratorio forzado durante el proceso de reclutamiento.

12. Los sujetos han padecido asma persistente moderado o severo documentado, dentro de los últimos dos años (ver Apéndice 8: *National Heart, Lung, and Blood Institute* (NHLBI), tabla de severidad del asma), o en el momento del reclutamiento padecen asma no controlado en cualquier estadio de clasificación (no debe olvidarse que los sujetos que padecen asma intermitente controlado o asma persistente moderado controlado en el momento del reclutamiento, sí pueden participar en el estudio).

13. Función cardiovascular inestable:

a. Isquemia sintomática, o

b. Anomalías en la conducción clínicamente relevantes y no controladas (p.ej., se excluirá a los pacientes con taquicardia ventricular que tomen antiarrítmicos; no se excluirá a los

pacientes con bloqueo auriculoventricular [AV] de primer grado o bloqueo fascicular anterior izquierdo (BFAI)/bloqueo de la rama derecha del haz de His (BRDHH), o

c. Insuficiencia cardíaca congestiva (ICC) de clase  $\geq 3$  de la clasificación funcional de la *New York Heart Association* (NYHA), o

d. Infarto agudo de miocardio (IAM) en los tres meses previos al comienzo del tratamiento del estudio.

14. Pacientes con hipertensión arterial no controlada.

15. Infección activa no controlada que requiera antibióticos, antivirales o antifúngicos por vía parenteral, dentro de la semana previa a la administración de la primera dosis de los fármacos de estudio.

16. Pacientes seropositivos para el virus de inmunodeficiencia humana (VIH) o seropositivos para la hepatitis B (definido por una prueba positiva para el antígeno de superficie de la hepatitis B [HBsAg]). Los sujetos con infección resuelta (es decir, los sujetos que son HBsAg negativos pero positivos para anticuerpos contra el antígeno central de la hepatitis B [antiHBc] y / o anticuerpos contra el antígeno de superficie de la hepatitis B [antiHBs]) deben seleccionarse mediante reacción en cadena de la polimerasa (PCR) en tiempo real, midiendo los niveles de ADN del virus de la hepatitis B (VHB). Los que sean positivos para PCR serán excluidos. EXCEPCIÓN: Los sujetos con hallazgos serológicos sugestivos de la vacunación contra el VHB (positividad antiHBs como el único marcador serológico) y un historial conocido de vacunación previa contra el VHB, no necesitan hacerse una prueba de ADN del VHB por PCR.

Pacientes seropositivo para la hepatitis C (excepto en el contexto de una respuesta virológica sostenida [SVR], definida como aviremia al menos 12 semanas después de la finalización de la terapia antiviral).

17. El paciente padece cualquier trastorno gastrointestinal que le impida ingerir comprimidos, o cualquier trastorno gastrointestinal que pueda interferir con la absorción del tratamiento en estudio.

18. El paciente presenta una condición psiquiátrica o médica lo suficientemente seria para que, en opinión del investigador, esta pueda interferir con el tratamiento.

19. El paciente se encuentra participando en otro ensayo clínico en el momento de su inclusión en el presente ensayo.

## **7.5 Fallos en el reclutamiento**

Los pacientes que firmen un documento de consentimiento informado y no reciban cualquiera de los fármacos en estudio serán considerados como fallos de reclutamiento. Para todos los fallos en el reclutamiento, el investigador introducirá en los eCRDs los números de reclutamiento y las razones de dichos fallos. Estos datos quedarán almacenados en los archivos del estudio del investigador, y podrán ser imprimidos desde dichos archivos en formato Log al final del estudio. Los fallos de reclutamiento serán reemplazados por nuevos pacientes.

## **8 TRATAMIENTO**

En este protocolo, el término “fármacos en estudio” hace referencia a bortezomib, daratumumab y selinexor. Los tres medicamentos deben administrarse tal y como se especifica en los “Cronogramas de Tiempos y Eventos”, así como en las tablas previas. Los días en los que haya que administrar los tres fármacos, el orden será: primero daratumumab seguido de bortezomib, y finalmente selinexor. La dexametasona debe administrarse como parte de la premedicación los días en los que se vaya a administrar daratumumab.

En el Manual de Farmacia se puede encontrar información detallada acerca de la composición de los fármacos en estudio. Todos los medicamentos que se vayan a emplear en este estudio deben ser manipulados únicamente por personal especializado y que posea formación para manejarlos de una forma segura. Los fármacos citotóxicos deben ser manipulados y preparados con precaución, y se recomienda el uso de guantes y otras vestimentas protectoras apropiadas. El farmacéutico o la persona autorizada para dispensar selinexor, daratumumab o bortezomib preparará estos productos en condiciones de asepsia.

Los ciclos son de 35 días (5 semanas de duración), y el tratamiento se dispensará hasta PE. El comienzo de cada ciclo puede tener lugar  $\pm 3$  días con respecto al día programado, para facilitar el acomodo al cronograma del centro o del sujeto. Estos serán tratados hasta PE, toxicidad inaceptable, u otras razones tal y como se enumeran en la sección correspondiente.

El comienzo de un ciclo se define como el comienzo de cualquiera de los tratamientos en estudio. Si todos los tratamientos se detienen se debería dar parte de esta incidencia, definiéndola como un retraso en el inicio de ese ciclo.

### **8.1 Administración de daratumumab**

#### **8.1.1 Preparación del daratumumab**

La solución para la inyección subcutánea se proporciona ya preparada en un vial de

aproximadamente 16 mL que contiene 1800 mg de daratumumab. Inmediatamente antes de la preparación, el vial debe mantenerse a temperatura ambiente al menos durante 30 minutos antes de la administración. El fármaco en estudio debe filtrarse durante el proceso de preparación. Se suministrarán, a cada farmacia y centro, manuales con descripciones detalladas para la preparación y administración de daratumumab.

### **8.1.2 Administración de daratumumab**

Daratumumab se administrará inicialmente a una dosis total de 1800 mg los días 1, 8, 15 y 22, durante los ciclos 1 y 2. Posteriormente se administrará cada dos semanas, los días 1 y 15, durante los ciclos del 3 al 6 y, a partir de ese momento, mensualmente (el día 1 de cada ciclo) en el resto de ciclos, en combinación con selinexor, bortezomib y dexametasona.

Cada vial de Daratumumab 1800 mg SC es un vial de un solo uso que contiene aproximadamente 16 ml de medicamento. Daratumumab se administrará como inyección subcutánea durante aproximadamente 3-5 minutos. La dosis para cada individuo es de 1800mg (1 vial).

Es necesario filtrar daratumumab durante su preparación. Si el centro no dispone de los filtros especificados en el manual de preparación, debe contactar con el promotor para que se los proporcione.

### **8.1.3 Pautas para la prevención y manejo de las reacciones a la inyección (Daratumumab)**

#### **8.1.3.1 Medicación previa a la inyección (Daratumumab)**

Para los sujetos que vayan a recibir daratumumab, las medicaciones previas a la inyección subcutánea se administrarán tal y como se describe en el Cronograma de Tiempos y Eventos. Los días de administración de daratumumab, los sujetos recibirán las siguientes medicaciones entre 1 y 3 horas antes de dicha infusión:

- Paracetamol (acetaminofén) 650-1.000 mg v.o.; y
- Antihistamínico (difenhidramina 25-50 mg, o equivalente, v.o.); y
- Dexametasona 20 mg v.o. (es equivalente a 100 mg de metilprednisolona)

NOTA: los días de dosificación en los que selinexor y dexametasona se administren con daratumumab, la dexametasona debe administrarse entre 1 y 3 horas antes de la infusión de daratumumab, como pre-medicación y por vía oral.

### **8.1.3.2 Medicación posterior a la inyección (Daratumumab)**

Todos los pacientes deben recibir 20 mg de Dexametasona v.o. al día siguiente de la administración de daratumumab, para prevenir reacciones tardías relacionadas con la infusión.

Deberían considerarse las siguientes medicaciones posteriores a la inyección para los sujetos con antecedentes de enfermedad pulmonar obstructiva crónica (p.ej., sujetos con EPOC con un FEV<sub>1</sub> <80% o sujetos con asma moderado):

- Antihistamínico (difenhidramina o equivalente)
- Agonista de receptor adrenérgico  $\beta_2$  de acción corta, tal como salbutamol en aerosol
- Medicaciones de control de la enfermedad pulmonar (p.ej., corticosteroides inhalados  $\pm$  agonistas de receptores adrenérgicos  $\beta_2$  de acción larga para los sujetos con asma; broncodilatadores de acción larga como tiotropio o salmeterol  $\pm$  corticosteroides inhalados para sujetos con EPOC)

Además, estos pacientes de riesgo podrán ser hospitalizados para su monitorización hasta dos noches después de la inyección. Si el sujeto no ha experimentado un evento clínicamente significativo, pero se le hospitaliza hasta el día siguiente únicamente para su observación, la hospitalización no deberá registrarse como un EAG. Los investigadores pueden prescribir los broncodilatadores, antihistamínicos y corticosteroides que juzguen necesarios para suministrar el cuidado de soporte apropiado en caso de que suceda un episodio de broncoespasmo una vez que los sujetos hayan abandonado el hospital/clínica. Si los sujetos de riesgo no experimentan reacciones importantes relacionadas con la inyección, se podría renunciar a estas medicaciones, a criterio del investigador, después de la administración íntegra de cuatro dosis de daratumumab.

### **8.1.4 Daratumumab: información de seguridad de referencia**

Se han observado los siguientes efectos secundarios cuando se ha administrado daratumumab mediante inyección subcutánea, bien como fármaco único o en combinación con otros, según la última versión disponible del Manual del Investigador, fechada el 20 de diciembre de 2019.

Efectos adversos muy comunes con daratumumab (afectan a más de uno de cada diez pacientes):

- Reacción asociada a la inyección (ver sección 8.1.5)
- Infecciones del tracto respiratorio superior (infección viral del tracto respiratorio superior, bronquitis)
- Neumonía
- Neutropenia
- Trombopenia
- Anemia
- Pérdida del apetito

- Linfopenia
- Leucopenia
- Neuropatía periférica sensitiva
- Cefalea
- Tos
- Disnea
- Estreñimiento
- Diarrea
- Náuseas
- Vómitos
- Espasmos musculares
- Fatiga
- Fiebre
- Astenia
- Edemas en manos, pies o extremidades
- Hipertensión
- Dolor de espalda
- Insomnio
- Dolor articular

Efectos adversos comunes con daratumumab (afectan a entre uno y diez de cada cien pacientes):

- Infección del tracto urinario
- Gripe
- Herpes zoster
- Sepsis
- Hiperglucemia
- Hipoclacemia
- Deshidratación
- Parestesia
- Hipoxia
- Fibrilación auricular
- Edema pulmonar
- Edema laríngeo
- Mareos
- Pancreatitis
- Exantema
- Prurito
- Dolor torácico
- Escalofríos
- Eritema en el lugar de la inyección
- Reacciones en el lugar de la inyección

Efectos secundarios poco comunes con daratumumab (afectan a entre uno y diez de cada mil pacientes):

- Reactivación virus hepatitis B (ver sección 12.2)

Efectos secundarios raros con daratumumab (afectan a entre uno y diez de cada diez mil pacientes):

- Reacción anafiláctica

#### **8.1.5 Manejo de las reacciones asociadas a la inyección (Daratumumab)**

Durante la administración de daratumumab debe observarse minuciosamente a los sujetos. Debe haber personal entrenado en la clínica que esté preparado para intervenir en caso de que suceda cualquier reacción a la infusión, y los recursos necesarios para la reanimación (p.ej., agentes como epinefrina y broncodilatador en aerosol, también equipamiento médico como botellas de oxígeno, aparataje para traqueotomía y un desfibrilador) deben encontrarse disponibles junto al paciente. Cuando se vaya a administrar el fármaco a múltiples pacientes al mismo tiempo, debe prestarse atención a que exista una dotación suficiente de personal cualificado.

Si se produce una reacción relacionada con la inyección, entonces esta debe detenerse. Los sujetos que sufran EAs durante la infusión deben ser tratados con arreglo al criterio del investigador y a la mejor práctica clínica. Se pueden aplicar las siguientes pautas:

- Los pacientes deberían ser tratados con acetaminofén, antihistamínicos o corticosteroides. Podría estar indicado el suero salino intravenoso. Para los broncoespasmos, urticaria o disnea, los sujetos podrían requerir antihistamínicos, oxígeno, corticosteroides o broncodilatadores. Para la hipotensión podrían requerir vasopresores.
- En caso de una reacción relacionada con la inyección que amenace la vida del paciente (que puede incluir eventos pulmonares o cardíacos), o de una reacción anafiláctica, se debería suspender daratumumab, y no se debería volver a administrar. Se deberá aplicar tratamiento sintomático intensivo.
- Si se detiene una administración subcutánea podría prolongarse el tiempo de inyección por encima de lo previsto.

##### **8.1.5.1 Eventos de grado 1 o de grado 2 relacionados con la inyección**

Si el investigador determina que un EA está relacionado con la inyección de daratumumab, entonces esta debe interrumpirse. Cuando la situación del sujeto sea estable, la inyección podrá reanudarse, a criterio del investigador. Si el paciente experimenta edema de laringe de grado 2 o mayor, o broncoespasmo de grado 2 o mayor, que no responden a la terapia sistémica y no se resuelven en las seis horas siguientes a su comienzo, se debe suspender el tratamiento al paciente de forma definitiva.

### **8.1.5.2    *Eventos de grado 3 o superior relacionados con la inyección***

Para los EAs de grado 3 o superior relacionados con la administración de daratumumab, esta debe detenerse, y se debe mantener al sujeto en estrecha observación hasta la resolución del EA. Si la intensidad de cualquier EA se mantiene en grado 3 o grado 4 después de dos horas se debe suspender el tratamiento al sujeto. Si la intensidad de cualquier EA disminuye a grado 1 o grado 2 dentro de las dos horas posteriores a su comienzo, la administración se puede reanudar a criterio del investigador. Modificación de la dosis de daratumumab.

No se permite la modificación de la dosis individual de daratumumab, pero el retraso en la administración es el principal método para gestionar las toxicidades asociadas a daratumumab.

### **8.1.5.3    *Manejo de las toxicidades relacionadas con daratumumab***

Durante el curso de un ciclo no se debe administrar una dosis de daratumumab si se cumple cualquiera de los criterios siguientes, para permitir la recuperación de la toxicidad relacionada con el tratamiento en estudio. Los criterios para un retraso de dosis son:

- Toxicidad hematológica de grado 4, o trombocitopenia de grado 3 o mayor con sangrado
- Neutropenia febril de cualquier grado
- Toxicidades no hematológicas de grado 3 o superior, con las siguientes excepciones:
  - Náuseas de grado 3 o vómitos de grado 3 que responden al tratamiento antiemético, o relacionados con selinexor.
  - Diarrea de grado 3 que responde al tratamiento antidiarréico, o relacionada con selinexor.
  - Elevación de la gamma-glutamyl transferasa de grado 3, aislada o relacionada con selinexor.
  - Fatiga o astenia de grado 3 que estaba presente basalmente, o que dura menos de siete días desde la última administración de daratumumab, o relacionada con selinexor.

En caso de aparecer toxicidades de menor grado a las descritas arriba, no sería necesario interrumpir la administración de daratumumab, sin embargo, se tendrá en cuenta el criterio clínico en la decisión de retrasar/interrumpir la administración de daratumumab en función del estado del paciente y la relación de la toxicidad encontrada con el daratumumab.

Si la administración de Daratumumab no comienza dentro de la ventana preespecificada de la fecha de administración prevista (+/- 3 días), entonces la dosis se considerará como una dosis perdida. La administración se puede reanudar en la siguiente fecha programada de dosificación.

Cualquier dosis retrasada durante más de 14 días por motivos de toxicidad implicará la suspensión permanente de daratumumab. No obstante, en aquellos pacientes en que se considere que la reanudación del tratamiento con daratumumab fuera de beneficio para el paciente, se debe consultar con los coordinadores del estudio.

#### **8.1.5.4 Interrupción de daratumumab o dosis perdidas**

Si una dosis de daratumumab se retrasa durante más de tres días con respecto a la fecha de administración prevista en el protocolo, por cualquier causa no relacionada con toxicidades sospechosas de estar asociadas con el uso de daratumumab, el hecho debe ponerse en conocimiento del sponsor. Los sujetos que pierdan tres o más dosis consecutivas programadas de daratumumab deben suspender el tratamiento en estudio, a menos que, tras consulta con el promotor y la valoración de seguridad y eficacia, se acuerde la continuación del tratamiento.

- Durante los ciclos 1 y 2 en los que daratumumab se administra semanalmente, si la dosis de Daratumumab se retrasa más de tres días (por cualquier causa relacionada o no con toxicidades asociadas a daratumumab), la reanudación de la dosificación incluye la administración de la siguiente dosis semanal planificada.
- Durante los ciclos del 3 al 6, en los que Daratumumab se administra cada dos semanas, si la dosis de Daratumumab se retrasa más de siete días (por cualquier causa relacionada o no con toxicidades asociadas a daratumumab), la reanudación de la dosificación incluye la administración de la siguiente dosis bisemanal planificada.
- En los ciclos a partir del Ciclo 7, en los que Daratumumab se administra cada 5 semanas, , si la dosis de Daratumumab se retrasa más de 21 días (por cualquier causa relacionada o no con toxicidades asociadas a daratumumab), la reanudación de la dosificación incluye la administración de la siguiente dosis mensual planificada.

Una dosis perdida/olvidada no se recuperará. Las consecuencias de las dosis retrasadas durante más de 14 días por otros motivos deberán ser valoradas con el promotor.

## **8.2 Administración de selinexor**

El fármaco en estudio selinexor se facilitará en forma de comprimido recubierto de liberación inmediata, para su administración oral. Se suministrarán comprimidos de una sola concentración (20 mg) en paquetes de envases blíster. Se administrará dexametasona con cada dosis de selinexor, pero la dexametasona no vendrá incluida en los paquetes de envases blíster.

### **8.2.1 Dosificación y administración de selinexor y dexametasona**

#### **8.2.1.1 Información sobre la dosificación de selinexor y dexametasona**

Selinexor se administrará a una dosis fija semanal de 60 mg v.o., en terapia continua. Para las dosis a recibir los días que el paciente no tenga que acudir al centro, la farmacia del hospital suministrará al paciente las correspondientes dosis para que se las lleve a su domicilio.

Se dará dexametasona (40 mg) con cada dosis de selinexor. Como se ha descrito previamente, los días en los que los pacientes tengan que recibir la combinación completa, la dexametasona se administrará primero, a una dosis de 20 mg v.o. aproximadamente una hora antes de la inyección de daratumumab, y selinexor se dará al final de la administración de daratumumab. El día posterior a la administración de daratumumab, el paciente tomará en casa 20 mg de dexametasona por vía oral. Para el resto de días, la dexametasona se administrará v.o. a una dosis de 40 mg. En los ciclos a partir del Ciclo 3, en los que daratumumab se administra los días 1 y 15, la dexametasona se administrará a una dosis de 40 mg v.o. el segundo y el cuarto día de tratamiento (días 8 y 22); en los ciclos a partir de Ciclo 7, en los que daratumumab se administra solo el Día 1, la dexametasona se dará a una dosis de 40 mg v.o. la segunda, tercera y cuarta semana de tratamiento (días 8, 15 y 22).

Selinexor debería darse a la vez, o en los 30 minutos posteriores a la ingesta de comida sólida acompañada de, al menos, 120 mL (4 onzas) de fluidos (agua, leche, etc.).

Los comprimidos de selinexor deben ser ingeridos enteros, y no deben triturarse para evitar un mayor riesgo de toxicidad dermatológica si el polvo entra en contacto con la piel.

#### **8.2.1.2 Instrucciones de dosificación para los participantes en el estudio**

La administración de selinexor y dexametasona será semanal, en terapia continua. El cumplimiento de la medicación de estudio será determinado por el investigador o delegado en cada visita del paciente, y registrado en los documentos fuente tras conversación con el paciente y recuento de los fármacos. Se registrará la fecha de acuerdo al calendario de visitas previsto en el. El Investigador Principal, o la persona designada, contabilizará el número de comprimidos dispensados vs. los que el paciente devuelva. Cualquier desviación, o dosis perdidas, serán anotadas en el eCRD y en los registros de inventariado de los fármacos, para verificar los motivos. El investigador, o la persona designada, tratará de que se observe el total cumplimiento del programa de dosificación, para lo cual facilitará las oportunas instrucciones, en lo referente a los tiempos, a los pacientes.

### **8.2.2 Pautas para la administración de selinexor**

Se suministrará selinexor en forma de comprimidos para su administración por vía oral. Selinexor debe ingerirse a la vez, o en los 30 minutos posteriores a, la ingesta de comida sólida acompañada de, al menos, 120 mL (4 onzas) de fluidos (agua, leche, etc.).

#### **- Requerimiento de antagonistas 5-HT3**

Con objeto de minimizar las náuseas todos los pacientes deben recibir antagonistas 5-hidroxitriptamina (5-HT3) (ondansetrón 8 mg o equivalente), a menos que estén contraindicados, comenzando el Día 1 del Ciclo 1 antes de la primera dosis del tratamiento en estudio, y continuando de dos a tres veces al día diariamente, según la necesidad. Se puede facilitar un tratamiento alternativo en los casos en los que los pacientes no toleren los antagonistas 5-HT3.

#### **- Requerimiento de olanzapina 2,5 mg**

Con objeto de minimizar las náuseas todos los pacientes pueden recibir (según criterio médico), olanzapina 2,5 mg vo diariamente, comenzando el C1D1 y reduciéndose a partir del ciclo 2 a criterio del investigador.

### **8.2.3 Recomendaciones sobre cuidados de soporte ante eventos adversos asociados a selinexor**

A todos los pacientes de este estudio deberían facilitárseles medidas de soporte para el cuidado médico óptimo. Además de la necesaria terapia profiláctica con antagonistas 5-HT3, deberían emplearse medidas de soporte de acuerdo con las pautas de cada institución y/o de las Pautas para la Práctica Clínica en Oncología (*NCCN Guidelines®*) del *National Comprehensive Cancer Network®* (NCCN), según esté a criterio del investigador clínicamente indicado.

#### **8.2.3.1 Infección**

La administración de agentes antibióticos y antifúngicos de amplio espectro i.v. debería comenzarse de inmediato en los pacientes que desarrollen fiebre u otros signos de infección sistémica. Selinexor debería suspenderse en cualquier paciente con infección de grado 4 o sepsis clínica (en ausencia de infección documentada) hasta que la situación se estabilice. Selinexor puede, en tal caso, reiniciarse a la misma dosis.

### **8.2.4 Pautas de reducción de dosis**

Selinexor, un inhibidor específico de XPO1, afecta a un abanico de supresores de tumores, reguladores del ciclo celular, oncoproteínas y factores de transcripción. A la vista de su complejo mecanismo, se espera que la asociación entre la dosis y la actividad antitumoral, así como la asociación entre la dosis y la tolerancia, sean altamente dependientes de factores relacionados tanto con el tumor como con el propio paciente. En coherencia con esta afirmación, y a la vista de

observaciones realizadas en estudios en curso con pacientes con tumores hematológicos y sólidos avanzados, selinexor muestra un rango terapéutico amplio, con actividad antitumoral desde los 12 a los 120 mg. Por tanto, con objeto de optimizar la actividad antitumoral y la tolerancia, se permitirán reducciones de dosis y/o modificaciones en el programa previsto, según se detalla abajo en la Tabla 4 y en la Tabla 5. Para algunos EAs se recomienda la interrupción antes que la reducción. En la Tabla 5 se encuentran las recomendaciones específicas.

Mientras que las toxicidades orgánicas severas asociadas con el fármaco no son comunes, existe un número de efectos secundarios constitucionales (y trombocitopenia) que pueden limitar la dosificación de selinexor. Estos efectos (p.ej. vómitos, fatiga, anorexia) son generalmente menos prevalentes en los pacientes que reciben selinexor una vez a la semana, como es el caso del presente protocolo. Sin embargo, como estos efectos se pueden reducir con agentes estándar y son reversibles, los pacientes deberían recibir un tratamiento agresivo con cuidados de soporte para reducir o eliminar toxicidades (ver Sección 12.2 - Terapias recomendadas). Además, debe destacarse que, a menudo, los efectos secundarios constitucionales se atenúan tras las primeras cuatro o seis semanas de dosificación, particularmente en los pacientes con buena eficacia antitumoral. Finalmente, algunos pacientes con respuestas rápidas del tumor experimentan síntomas relevantes de fatiga, náuseas, malestar y/o astenia tras una o más dosis de selinexor. Este efecto no se ha asociado con marcadores clásicos de síndrome de lisis tumoral, pero si se sospechara, se recomienda encarecidamente la evaluación de la respuesta del tumor.

Se empleará la versión 5 de los CTCAE del NCI para graduar la severidad de los EAs; las modificaciones del tratamiento en estudio, que se describen abajo, se aplicarán con arreglo a esta graduación de la severidad. La toxicidad se registrará tal y como se describe en la Sección 18 (sección de los EAs). Si concurre más de un tipo de toxicidad, la modificación será determinada por la de mayor grado de severidad.

Debe registrarse cada modificación de dosis o cada retraso del tratamiento, así como los motivos del mismo.

La Tabla 4 recoge las dosis de inicio de selinexor (nivel de dosis 0: 60mg) y las modificaciones de dosis recomendables (p.ej., niveles de dosis -1 hasta -2), para los EAs que se enumeran en la Tabla 5. Los pacientes que toleren la dosis reducida durante al menos un ciclo, y cuya respuesta sea subóptima, podrían incrementar su dosis en un nivel, a criterio del médico tratante. Asimismo, si el nuevo nivel de dosis se tolera durante al menos un ciclo, la dosis puede, de nuevo, incrementarse un nivel. La máxima dosis semanal de selinexor en este protocolo es 60 mg. A destacar: este

incremento en el nivel de la dosis es particularmente importante conforme la intensidad de daratumumab se va reduciendo en los ciclos 3 (a bisemanal) y 7 (a una vez cada cinco semanas).

Tabla 4. Modificaciones preespecificadas de la dosis para los EAs relacionados con selinexor

| Nivel de dosis de selinexor      | Dosis semanal total de selinexor | Pauta de dosis de selinexor |
|----------------------------------|----------------------------------|-----------------------------|
| Nivel de dosis 0 (nivel inicial) | 60 mg                            | 60 mg 1-sm                  |
| Nivel de dosis -1                | 40 mg                            | 40 mg 1-sm                  |
| Nivel de dosis -2                | 20 mg                            | 20 mg 1-sm                  |

1-sm, una vez por semana.

Tabla 5. Cuidados de soporte y pautas de ajuste de dosis sugeridas para EAs relacionados con selinexor

| Toxicidad e intensidad                                                                                                    | Cuidados de soporte y pautas de ajuste de dosis                                                                                                                                                                                                                                                                                                                                                    |
|---------------------------------------------------------------------------------------------------------------------------|----------------------------------------------------------------------------------------------------------------------------------------------------------------------------------------------------------------------------------------------------------------------------------------------------------------------------------------------------------------------------------------------------|
| <b>Fatiga (común)</b>                                                                                                     |                                                                                                                                                                                                                                                                                                                                                                                                    |
| Grado 1 o<br>Grado 2 duración ≤7 días                                                                                     | Mantener la dosis. Descartar otras causas. Si se detecta anemia, considerar transfusión de hematíes (si hemoglobina <8 g/dL)                                                                                                                                                                                                                                                                       |
| Grado 2 duración >7 días o<br>Grado ≥3                                                                                    | Descartar otras causas. Si se detecta anemia, considerar transfusión de hematíes (si hemoglobina <8 g/dL). Interrumpir selinexor hasta resolución a Grado 1 o a situación basal. Si sucede por primera vez, reiniciar selinexor a la dosis habitual. Si sucede ≥dos veces, reducir selinexor un nivel de dosis.                                                                                    |
| <b>Anorexia o pérdida de peso</b>                                                                                         |                                                                                                                                                                                                                                                                                                                                                                                                    |
| Anorexia de Grado 1 o pérdida de peso de Grado 1<br>Anorexia de Grado 2                                                   | Mantener la dosis. Descartar otras causas. Considerar la realización de una consulta al nutricionista y utilizar suplementos nutricionales (p.ej. Ensure®, Boost®, etc.). Considerar el uso de estimulantes del apetito (p.ej. acetato de megestrol, dronabinol, etc.).                                                                                                                            |
| Pérdida de peso de Grado 2<br>Anorexia de Grado ≥3 y<br>pérdida de peso                                                   | Descartar otras causas. Considerar la realización de una consulta al nutricionista y utilizar suplementos nutricionales (p.ej. Ensure®, Boost®, etc.). Considerar el uso de estimulantes del apetito (p.ej. acetato de megestrol, dronabinol, olanzapina, etc.). Interrumpir selinexor hasta mejoría a Grado 1 o a situación basal y estabilización del peso. Reducir selinexor un nivel de dosis. |
| <b>Náuseas, vómitos (común)</b>                                                                                           |                                                                                                                                                                                                                                                                                                                                                                                                    |
| Grados 1 o 2<br>(si intolerable o Grado 2 persistente sin respuesta a cuidados de soporte, seguir las pautas del Grado 3) | Mantener la dosis. Descartar otras causas. Utilizar otros fármacos contra las náuseas además de los antagonistas 5-HT3 a los que obliga el protocolo.                                                                                                                                                                                                                                              |

| Toxicidad e intensidad                                                                  | Cuidados de soporte y pautas de ajuste de dosis                                                                                                                                                                                                                                                                                                                                                                                                                                                                                                                                                                                                                                               |
|-----------------------------------------------------------------------------------------|-----------------------------------------------------------------------------------------------------------------------------------------------------------------------------------------------------------------------------------------------------------------------------------------------------------------------------------------------------------------------------------------------------------------------------------------------------------------------------------------------------------------------------------------------------------------------------------------------------------------------------------------------------------------------------------------------|
| Grado 3                                                                                 | <p>Descartar otras causas. Utilizar otros fármacos contra las náuseas además de los antagonistas 5-HT3 a los que obliga el protocolo.</p> <p>Interrumpir selinexor hasta mejoría a Grado <math>\leq 2</math> o a situación basal y reducir selinexor un nivel de dosis.</p>                                                                                                                                                                                                                                                                                                                                                                                                                   |
| <b>Hiponatremia (común)</b>                                                             |                                                                                                                                                                                                                                                                                                                                                                                                                                                                                                                                                                                                                                                                                               |
| Grado 1 (niveles de sodio: normal a 130 mmol/L)                                         | <p>Mantener la dosis. Descartar otras causas incluyendo los efectos secundarios de las medicaciones concomitantes.</p> <p>Asegurarse de que el nivel de sodio registrado está corregido por la hiperglicemia concurrente (glucosa sérica <math>&gt;150</math> mg/dL).</p> <p>Tratar la hiponatremia con arreglo a las pautas de cada institución, incluyendo la revisión de la dieta. Considerar la suplementación de la dieta del paciente con comprimidos de sal.</p>                                                                                                                                                                                                                       |
| Grado 3 con niveles de sodio: 130-120 mmol/L sin síntomas                               | <p>Descartar otras causas incluyendo efectos de fármacos (p.ej., diuréticos).</p> <p>Asegurarse de que el nivel de sodio registrado está corregido por la hiperglicemia concurrente (glucosa sérica <math>&gt;150</math> mg/dL).</p> <p>Si el sodio (corregido) indica una hiponatremia de Grado <math>\leq 3</math> y continúa siendo asintomática, entonces el paciente puede continuar con la dosis habitual sin interrupción, siempre y cuando se le suministre sal i.v. y/o comprimidos de sal.</p> <p>Si el Grado 3 persiste, o empeora, o no responde al tratamiento, interrumpir selinexor hasta resolución a Grado 1 o a situación basal, y reducir selinexor un nivel de dosis.</p> |
| Grado 3 con niveles de sodio $<130$ -120 mmol/L con síntomas o Grado 4 ( $<120$ mmol/L) | <p>Descartar otras causas incluyendo efectos de fármacos (p.ej., diuréticos).</p> <p>Asegurarse de que el nivel de sodio registrado está corregido por la hiperglicemia concurrente (glucosa sérica <math>&gt;150</math> mg/dL).</p> <p>Interrumpir selinexor hasta resolución a Grado 1 o a situación basal y sin síntomas. Suministrar comprimidos de sal. Reducir selinexor un nivel de dosis.</p>                                                                                                                                                                                                                                                                                         |
| <b>Diarrea (común)</b>                                                                  |                                                                                                                                                                                                                                                                                                                                                                                                                                                                                                                                                                                                                                                                                               |
| Grado 1                                                                                 | <p>Mantener la dosis. Descartar otras causas incluyendo los efectos secundarios de las medicaciones concomitantes. Tratar con antidiarreicos según las pautas de la institución</p>                                                                                                                                                                                                                                                                                                                                                                                                                                                                                                           |
| Grado 2                                                                                 | <p>Descartar otras causas incluyendo efectos de fármacos. Tratar con antidiarreicos según las pautas de la institución.</p> <p>Interrumpir selinexor hasta resolución a Grado 1 o a situación basal.</p> <p>Si sucede por primera vez, reiniciar selinexor a la dosis habitual.</p> <p>Si sucede <math>\geq 2</math> veces, reducir selinexor un nivel de dosis.</p>                                                                                                                                                                                                                                                                                                                          |
| Grados 3 o 4                                                                            | <p>Interrumpir selinexor hasta resolución a Grado 1 o a situación basal y que el paciente esté clínicamente estable. Reducir selinexor un nivel de dosis.</p>                                                                                                                                                                                                                                                                                                                                                                                                                                                                                                                                 |
| <b>Trombocitopenia</b>                                                                  |                                                                                                                                                                                                                                                                                                                                                                                                                                                                                                                                                                                                                                                                                               |

| Toxicidad e intensidad | Cuidados de soporte y pautas de ajuste de dosis                                                                                                                                                                                                                                                                                                                                                                                                                                                                                                                                                                                                                                                                                                                                                                                                                                                                                                                                                                                                                                                                                                                                                                                                                                 |
|------------------------|---------------------------------------------------------------------------------------------------------------------------------------------------------------------------------------------------------------------------------------------------------------------------------------------------------------------------------------------------------------------------------------------------------------------------------------------------------------------------------------------------------------------------------------------------------------------------------------------------------------------------------------------------------------------------------------------------------------------------------------------------------------------------------------------------------------------------------------------------------------------------------------------------------------------------------------------------------------------------------------------------------------------------------------------------------------------------------------------------------------------------------------------------------------------------------------------------------------------------------------------------------------------------------|
| Grados 1 o 2           | Mantener la dosis. Descartar otras causas incluyendo efectos de fármacos.                                                                                                                                                                                                                                                                                                                                                                                                                                                                                                                                                                                                                                                                                                                                                                                                                                                                                                                                                                                                                                                                                                                                                                                                       |
| Grado 3 sin sangrado   | <p>Descartar otras causas incluyendo los efectos secundarios de las medicaciones concomitantes.</p> <p>Si sucede por primera vez: continuar con la dosificación sin interrupción; sin embargo, reducir selinexor un nivel de dosis. Si la dosificación de selinexor es bisemanal, reducir a dosificación continua de una vez por semana.</p> <p>Si sucede <math>\geq</math> dos veces: interrumpir selinexor y/o bortezomib, y comprobar semanalmente los recuentos de plaquetas hasta recuperación a Grado 2 o a situación basal, y reducir selinexor un nivel de dosis. Si el evento sucede el Día 1 de un ciclo, retrasar el comienzo del ciclo y comprobar semanalmente los recuentos de plaquetas hasta recuperación a Grado 2 o a situación basal, y reducir selinexor un nivel de dosis en la reanudación.</p> <p>En los casos en los que concurra un compromiso preexistente de la función medular (p.ej., debido a terapia previa tóxica para la médula), el Investigador, tras consultar con el Monitor Científico de Pethema, podrá decidir la continuación de selinexor sin reducciones de dosis y/o interrupciones tal y como se especifica arriba, siempre y cuando los recuentos plaquetares y los signos/síntomas de sangrado se monitoricen estrechamente.</p> |
| Grado 4 sin sangrado   | <p>Descartar otras causas incluyendo efectos de fármacos.</p> <p>Interrumpir selinexor hasta resolución a Grado 2 o a situación basal y reducir selinexor un nivel de dosis. Si la dosificación de selinexor es bisemanal, reducir a dosificación continua de una vez por semana. Si el evento sucede el Día 1 de un ciclo, retrasar el comienzo del ciclo y comprobar semanalmente los recuentos de plaquetas hasta recuperación a Grado 2 o situación basal, y reducir selinexor un nivel de dosis en la reanudación.</p> <p>En los casos en los que concurra un compromiso preexistente, relevante, de la función medular (p.ej., debido a terapia previa tóxica para la médula), el Investigador, tras consultar con el Monitor Científico de Pethema, podrá decidir la continuación de selinexor sin reducciones de dosis y/o interrupciones tal y como se especifica arriba, siempre y cuando los recuentos plaquetares y los signos/síntomas de sangrado se monitoricen estrechamente</p>                                                                                                                                                                                                                                                                                |

| Toxicidad e intensidad                                                                                                                                                                                                                                                                                                                                                                       | Cuidados de soporte y pautas de ajuste de dosis                                                                                                                                                                                                                                                                                                                                                                                                                                                                                                                                                                                                                                                                                                                                                                                   |
|----------------------------------------------------------------------------------------------------------------------------------------------------------------------------------------------------------------------------------------------------------------------------------------------------------------------------------------------------------------------------------------------|-----------------------------------------------------------------------------------------------------------------------------------------------------------------------------------------------------------------------------------------------------------------------------------------------------------------------------------------------------------------------------------------------------------------------------------------------------------------------------------------------------------------------------------------------------------------------------------------------------------------------------------------------------------------------------------------------------------------------------------------------------------------------------------------------------------------------------------|
| ≥ Grado 3 con sangrado                                                                                                                                                                                                                                                                                                                                                                       | Interrumpir selinexor y comprobar semanalmente los recuentos plaquetares hasta que haya cesado el sangrado, el paciente se encuentre clínicamente estable y las plaquetas se hayan recuperado a Grado 2 o a la situación basal. Cuando selinexor se reanude, reducir un nivel de dosis. Si la dosificación de selinexor es bisemanal, reducir a dosificación continua de una vez por semana. Si el evento sucede el Día 1 de un ciclo, retrasar el comienzo del ciclo y comprobar semanalmente los recuentos de plaquetas hasta que el sangrado haya cesado, el paciente se encuentre clínicamente estable y las plaquetas se hayan recuperado a Grado 2 o situación basal, y reducir selinexor un nivel de dosis en la reanudación.                                                                                              |
| <b>Neutropenia</b>                                                                                                                                                                                                                                                                                                                                                                           |                                                                                                                                                                                                                                                                                                                                                                                                                                                                                                                                                                                                                                                                                                                                                                                                                                   |
| Neutropenia de Grados 3 o 4<br>Con fiebre (neutropenia febril)<br>o sin fiebre                                                                                                                                                                                                                                                                                                               | Iniciar factores estimuladores de colonias y antibióticos profilácticos, de acuerdo con las indicaciones clínicas de las pautas de cada institución.<br>Interrumpir selinexor o bortezomib, o ambos, y comprobar semanalmente los neutrófilos hasta su recuperación a Grado 2 o situación basal, y hasta la desaparición de la fiebre (si neutropenia febril) y que el paciente se encuentre clínicamente estable. Reducir selinexor un nivel de dosis en la reanudación. Si el evento sucede el Día 1 de un ciclo, retrasar el comienzo del ciclo y comprobar semanalmente los neutrófilos hasta que se hayan recuperado a Grado 2 o a situación basal, y hasta la desaparición de la fiebre (si neutropenia febril) y que el paciente se encuentre clínicamente estable. Reducir selinexor un nivel de dosis en la reanudación. |
| <b>Anemia</b>                                                                                                                                                                                                                                                                                                                                                                                |                                                                                                                                                                                                                                                                                                                                                                                                                                                                                                                                                                                                                                                                                                                                                                                                                                   |
| Tratar según las pautas de la institución incluyendo transfusiones sanguíneas y/o eritropoyetinas. Considerar la transfusión para hemoglobinas <8 g/dL. De ser posible, mantener la dosis de selinexor siempre y cuando el paciente se encuentre clínicamente estable, pero si se desea una reducción en la dosis o su interrupción, se debe consultar con el Monitor Científico de Pethema. |                                                                                                                                                                                                                                                                                                                                                                                                                                                                                                                                                                                                                                                                                                                                                                                                                                   |
| <b>Otros eventos adversos relacionados con selinexor</b>                                                                                                                                                                                                                                                                                                                                     |                                                                                                                                                                                                                                                                                                                                                                                                                                                                                                                                                                                                                                                                                                                                                                                                                                   |
| Grados 1 o 2                                                                                                                                                                                                                                                                                                                                                                                 | Descartar otras causas. Mantener la dosis. Iniciar tratamiento y/o cuidados estándar de soporte según las pautas de la institución                                                                                                                                                                                                                                                                                                                                                                                                                                                                                                                                                                                                                                                                                                |
| Grados 3 o 4                                                                                                                                                                                                                                                                                                                                                                                 | Descartar otras causas. Interrumpir selinexor hasta recuperación a Grado 2 o situación basal, y reducir selinexor un nivel de dosis.<br><br>Los valores aislados de fosfatasa alcalina de Grado ≥3 NO requieren interrupción de la dosis. Debería realizarse la discriminación de origen hepático vs. óseo, y se debería llevar a cabo la determinación de gamma-glutamyl transferasa, 5'-nucleotidasa u otras enzimas hepáticas                                                                                                                                                                                                                                                                                                                                                                                                  |

| Toxicidad e intensidad                                                                                                                                                                                                                                                                                                                                                                                                                                                                                                                                                                                                                                                                                                                                                                                                                                                                                      | Cuidados de soporte y pautas de ajuste de dosis |
|-------------------------------------------------------------------------------------------------------------------------------------------------------------------------------------------------------------------------------------------------------------------------------------------------------------------------------------------------------------------------------------------------------------------------------------------------------------------------------------------------------------------------------------------------------------------------------------------------------------------------------------------------------------------------------------------------------------------------------------------------------------------------------------------------------------------------------------------------------------------------------------------------------------|-------------------------------------------------|
| <p>Todas las modificaciones de dosis deben basarse en la peor toxicidad precedente.</p> <p>Nota: se recomienda encarecidamente al Investigador que, para aquellos EAs de los que se piense que pueden deberse a causas multifactoriales, reduzca o interrumpa la dosis de un fármaco cada vez.</p> <p><sup>a</sup>Para todos los EAs, hematológicos o no hematológicos, de Grado <math>\geq 3</math> que NO estén relacionados con selinexor, la dosificación de selinexor se puede mantener tras consultar con el Monitor Científico de Pethema y a criterio del investigador.</p> <p><sup>b</sup>Para todos los EAs relacionados con selinexor, si las prescripciones de reducciones/interrupciones de dosis especificadas arriba conducen a una estabilización de <math>\geq 4</math> semanas, se puede considerar un escalado al alza siempre y cuando lo apruebe el Monitor Científico de Pethema.</p> |                                                 |

### 8.2.5 Condiciones que no requieren reducción de dosis de selinexor

Las siguientes condiciones son excepciones a las pautas de modificación de dosis. En estos casos no se requiere modificar la pauta de uso de selinexor:

- Alopecia de cualquier grado.
- Anormalidades en electrolitos o en analitos séricos (p.ej., uratos) que sean reversibles con intervenciones estándar.
- Valores aislados de grado  $\geq 3$  de fosfatasa alcalina. Debería realizarse la discriminación de origen hepático vs. óseo, y se debería llevar a cabo la determinación de gamma-glutamil transferasa, 5'-nucleotidasa u otras enzimas hepáticas.

### 8.2.6 Ajuste de la dosis de selinexor en un contexto de infección

Los pacientes con infecciones activas no controladas o con sospecha de infección deberían suspender temporalmente el tratamiento hasta que la infección se haya resuelto y/o el paciente se encuentre clínicamente estable. Los pacientes cuyas infecciones se encuentren clínicamente estabilizadas pueden reanudar la dosificación. En estos casos, el tratamiento puede continuar administrándose a la dosis original. No se reemplazarán las dosis perdidas. A criterio del investigador, los pacientes pueden continuar con antibióticos durante periodos prolongados mientras reinician su tratamiento.

Nota: Selinexor se ha asociado con muy pocas infecciones oportunistas en los más de 2.200 pacientes evaluados en términos de seguridad hasta el 31 de julio de 2017.

### **8.2.6.1 Dosis perdidas**

Con las dosis perdidas debe procederse como sigue:

- **Si se perdió una dosis**, el cronograma de esa semana debe modificarse para acomodar dos dosis en esa semana con, al menos, 36 horas entre dos dosis consecutivas.
- **Si se necesita prescindir de una dosis** (p.ej., debido a la recomendación del médico que está tratando al paciente), la siguiente será administrada de acuerdo con el cronograma. Las dosis no deben administrarse a intervalos inferiores a 36 horas, y se deben registrar todas las dosis perdidas y retrasadas.

Si un paciente perdiera un periodo de dosificación de una o dos semanas enteras por motivos no relacionados con el tratamiento en estudio (p.ej., por el requerimiento de un procedimiento médico o por una emergencia personal imprevista), los días perdidos sí podrían ser recuperados, siempre y cuando se cumpla que transcurran 36 horas entre dos dosis de Selinexor. De este modo, las determinaciones de laboratorio y radiográficas continuarán siendo apropiadas al ritmo de administración de la terapia anti-cáncer.

### **8.2.6.2 Dosis vomitadas**

Si se vomita una dosis dentro de la hora posterior a la ingestión, será reemplazada. Si el vómito sucede más tarde de ese tiempo, se considerará como una dosis completa.

## **8.3 Pautas para la administración de bortezomib**

Se administrará bortezomib a una dosis de 1,3 mg/m<sup>2</sup> por vía s.c. una vez a la semana, los días 1, 8, 15 y 22, comenzando desde el primer ciclo; y los días 1 y 15 (frecuenciaquincenal) a partir del ciclo 9, hasta la progresión de la enfermedad o toxicidad inaceptable. Se administrará dexametasona como se ha indicado previamente, a una dosis de 40 mg v.o. los días en los que no se administre daratumumab; los días en los que sí se deba administrar daratumumab se darán previamente 20 mg de dexametasona v.o., y se darán otros 20 mg de ésta v.o. al día siguiente.

La cantidad en mg de bortezomib a administrar, se determinará según el ASC, y se calculará de acuerdo con un nomograma estándar. La dosis total calculada de bortezomib puede redondearse al decimal más próximo (p.ej., una dosis calculada de 2,47 mg puede redondearse a 2,5 mg).

En los sujetos que experimenten reacciones en el sitio de inyección, bortezomib se administrará en inyección i.v. (ver la sección del Manual de Procedimientos del Producto en Investigación para consultar las pautas de reconstitución, secciones 4.3-4.9).

Los días de administración de daratumumab, bortezomib se administrará al final de la infusión del primero, y selinexor será el último fármaco recibido por el paciente.

- El volumen de diluyente usado para la reconstitución de bortezomib para su administración s.c. es diferente del empleado para la administración i.v. Debido a los distintos volúmenes añadidos, tras la reconstitución las soluciones difieren en la concentración del fármaco.
- Bortezomib debe ser reconstituido por un profesional del ámbito sanitario empleando una jeringa del tamaño apropiado, sin quitar el tapón del vial y empleando estrictamente técnicas de asepsia, ya que el producto no contiene agentes preservantes.
- El producto reconstituido debe utilizarse inmediatamente después de su preparación. Sin embargo, se ha demostrado que la estabilidad química y física en-uso de la solución reconstituida, almacenada en el vial original y/o jeringa, es de ocho horas a 25 °C. No es necesario proteger de la luz el producto reconstituido.
- Para evitar errores de administración, las jeringas de uso s.c. e i.v. deben etiquetarse de modo diferente.
- El uso es exclusivamente s.c. o i.v., no deben emplearse otras vías.
- Bortezomib 1 mg es exclusivamente para uso i.v.; para las instrucciones de seguridad debe consultarse el prospecto del envase.

#### **8.3.1 Reconstitución del vial de 3,5 mg de bortezomib**

La solución reconstituida debe inspeccionarse visualmente antes de su administración, para analizar la presencia de partículas y decoloración. Se debe desechar la solución reconstituida si se detectara decoloración o materia particulada.

Una vez disuelta, se debe tomar la cantidad apropiada de la solución con el fármaco reconstituido, según la dosis calculada con arreglo al ASC del paciente.

#### **8.3.2 Reconstitución y administración subcutánea (s.c.) de bortezomib**

Para su reconstitución, añadir al vial de bortezomib 1,4 mL de solución estéril de cloruro sódico al 0,9%, para una concentración final de 2,5 mg/mL.

- Confirmar la dosis en la jeringa antes de su uso (comprobar que la jeringa esté etiquetada para la administración s.c.).
- Inyectar la solución por vía s.c., con un ángulo de 45-90°.

- La solución reconstituida debe administrarse por vía s.c. en muslos o abdomen, y los sitios de inyección deben rotarse para las inyecciones posteriores.
- Deben evitarse las inyecciones en el mismo sitio
  - Alternar entre abdomen derecho e izquierdo (cuadrante superior o inferior)
  - Muslo derecho e izquierdo (sitios proximal y distal)

### **8.3.3 Reconstitución y administración intravenosa (i.v.) de bortezomib**

Para su reconstitución, añadir 3,5 mL de solución estéril de cloruro sódico al 0,9% al vial de bortezomib, para una concentración final de 1,0 mg/mL.

Confirmar la dosis en la jeringa antes de su uso (comprobar que la jeringa está etiquetada para la administración i.v.).

Injectar la solución en una vena a través de un catéter i.v. periférico o central, en bolo de 3 a 5 segundos.

Enjuagar el catéter periférico o central con solución estéril de cloruro sódico a 9 mg/mL (0,9%).

### **8.3.4 Reacciones tóxicas asociadas a bortezomib y modificaciones de dosis**

Los ajustes de dosis deben basarse en el mayor grado de toxicidad adscrito a bortezomib. La terapia con bortezomib debe interrumpirse ante la instauración de cualquier toxicidad no hematológica de grado 3, o hematológica de grado 4, excluyendo la neuropatía, según se discute en la Tabla 6. Una vez se hayan resuelto los problemas de toxicidad, la terapia con bortezomib puede reiniciarse a una dosis reducida en un 25% con arreglo a la pauta aprobada, como sigue:

- Dosis inicial – 1,3 mg/m<sup>2</sup>
- Nivel de Dosis 1 – 1,0 mg/m<sup>2</sup>
- Nivel de Dosis 2 – 0,7 mg/m<sup>2</sup>
- Nivel de Dosis 3 – suspender Bortezomib

#### **8.3.4.1 Toxicidad hematológica de bortezomib**

Si el sujeto experimenta neutropenia, el investigador debería considerar el uso de factores de crecimiento para gestionar la situación. Si el recuento de neutrófilos continúa disminuyendo, o si disminuyen los recuentos plaquetares, entonces deberían llevarse a cabo ajustes de dosis con arreglo a las recomendaciones mostradas en la siguiente sección (Tabla 6) sobre toxicidades hematológicas.

Tabla 6. Modificaciones de dosis por toxicidad hematológica

| Toxicidad hematológica                                                                                  | Modificación de dosis                                                                                                                                                                                                             |
|---------------------------------------------------------------------------------------------------------|-----------------------------------------------------------------------------------------------------------------------------------------------------------------------------------------------------------------------------------|
| <b>Neutropenia</b>                                                                                      |                                                                                                                                                                                                                                   |
| Grado 3 (sin complicaciones)                                                                            | No reducir dosis, considerar tratamiento con G-CSF                                                                                                                                                                                |
| Neutropenia asociada con fiebre ( $\geq 38,5^{\circ}\text{C}$ ) o neutropenia Grado 4                   | Interrumpir bortezomib hasta recuperación a situación basal o Grado $\leq 2$ . Tras la recuperación, reiniciar bortezomib a la dosis habitual y considerar soporte con G-CSF. Si se repite, reducir bortezomib un nivel de dosis. |
| <b>Trombocitopenia</b>                                                                                  |                                                                                                                                                                                                                                   |
| Grado 3 (sin complicaciones)                                                                            | No se requiere reducción de dosis                                                                                                                                                                                                 |
| Recuento plaquetar $< 25.000/\mu\text{L}$ (es decir, Grado 4) o trombocitopenia de Grado 3 con sangrado | Interrumpir bortezomib hasta recuperación a situación basal o Grado $\leq 2$ . Tras la recuperación, reiniciar reduciendo bortezomib un nivel de dosis.                                                                           |

G-CSF, factores estimuladores de colonias de granulocitos

#### 8.3.4.2 Toxicidad neurológica de bortezomib

Si el sujeto experimenta neuropatía periférica, los ajustes de dosis deben realizarse con arreglo a las recomendaciones de la Tabla 7.

Tabla 7. Modificaciones de dosis recomendadas para daño neuropático y/o neuropatía sensorial periférica o motora

| Gravedad de los signos y síntomas de la neuropatía periférica*                                                                                                                                                                                                                                                                                                                               | Modificación de dosis y régimen                                                                                                                                         |
|----------------------------------------------------------------------------------------------------------------------------------------------------------------------------------------------------------------------------------------------------------------------------------------------------------------------------------------------------------------------------------------------|-------------------------------------------------------------------------------------------------------------------------------------------------------------------------|
| Grado 1 (asintomática; pérdida de reflejos tendinosos profundos o parestesia) sin daño ni pérdida de función                                                                                                                                                                                                                                                                                 | No se requiere ninguna acción                                                                                                                                           |
| Grado 1 con daño o Grado 2 (síntomas moderados; afectando a Actividades Instrumentales de la Vida Diaria [AIVD])**                                                                                                                                                                                                                                                                           | Reducir bortezomib a $1 \text{ mg/m}^2$                                                                                                                                 |
| Grado 2 con daño o Grado 3 (síntomas graves; afectación de las actividades de la vida diaria [AVD] relativas al cuidado personal)***                                                                                                                                                                                                                                                         | Interrumpir bortezomib hasta que la toxicidad se resuelva. Cuando esto suceda, reiniciar con una dosis de bortezomib reducida a $0,7 \text{ mg/m}^2$ una vez por semana |
| Grado 4 (consecuencias potencialmente fatales; indicada intervención urgente)                                                                                                                                                                                                                                                                                                                | Suspender bortezomib                                                                                                                                                    |
| <p>*Graduada en virtud de los criterios de la Versión 5.0 de NCI-CTCAE.</p> <p>**AIVD, hace referencia a preparar comidas, comprar alimentos o ropa, usar el teléfono, manejar dinero, etc.</p> <p>***AVD relativas al cuidado personal: hace referencia a baño/ducha, vestirse y desvestirse, alimentarse por uno mismo, uso del inodoro, ingesta de fármacos, y no postración en cama.</p> |                                                                                                                                                                         |

#### 8.3.4.3 Otros EAs de Grado 3 o Grado 4

Para otras toxicidades de grados 3 o 4 que el investigador juzgue como asociadas únicamente a Bortezomib, el tratamiento con este debe interrumpirse, y reiniciarse al siguiente nivel inferior de

dosis una vez que la toxicidad se haya resuelto a grado 2 o inferior. El tratamiento con selinexor, daratumumab y dexametasona puede continuar, a menos que la toxicidad cumpla criterios para retrasar las dosis de selinexor y/o daratumumab, según se ha especificado en anteriores secciones.

#### **8.3.4.4 Modificaciones de dosis de bortezomib por reducción de peso**

No es necesario modificar la dosis para cambios en el peso del paciente que supongan menos del 10% con respecto al peso basal.

Si un paciente registra antes de iniciar un ciclo una reducción de peso superior al 10% con respecto al basal, entonces será necesario recalcular la dosis ( $1,3 \text{ mg/m}^2$ ), ajustada al peso del paciente en el día de inicio del nuevo ciclo de tratamiento.

### **8.4 Pautas para la administración de dexametasona**

La dosis semanal total de glucocorticoides debe mantenerse a ~40 mg de dexametasona (o equivalente). Dado que daratumumab se administra con 100 mg de metilprednisolona i.v. (o el equivalente, 20 mg de dexametasona), las semanas en las que se dé daratumumab, el día posterior la dosis de dexametasona no debería ser superior a 20 mg. Para pacientes con edades superiores a 75 años, la dosis semanal total de dexametasona puede reducirse a 20 mg y, en esos casos, las semanas en las que se administre daratumumab se pueden dar 100 mg de metilprednisolona i.v. sin dexametasona adicional.

Existe un amplio conocimiento acerca del manejo de los efectos secundarios de los glucocorticoides comunes. Se recomienda encarecidamente el uso de inhibidores de la bomba de protones (IBP), antihipertensivos y otros agentes, con objeto de intentar mantener en este estudio el uso intermitente de dexametasona en combinación con selinexor.

Los pacientes con osteopenia u osteoporosis documentadas deben continuar tomando dexametasona con selinexor y daratumumab con arreglo a las indicaciones del estudio. Deberían instituirse las precauciones estándar, tales como el uso de bifosfonatos, a menos que exista una contraindicación.

#### **8.4.1 Reacciones tóxicas asociadas a dexametasona y modificaciones de dosis**

En caso de que un paciente experimente cualquier toxicidad que se considere relacionada con dexametasona, la dosis de dicho fármaco deberá reducirse de acuerdo con las tablas 8 y 9. Si un paciente no puede tolerar el nivel de dosis -2, deberá interrumpirse la administración de dexametasona y el paciente podrá continuar recibiendo daratumumab, selinexor y bortezomib, siempre que no exista ninguna otra toxicidad significativa que sea atribuible a estos fármacos.

**Tabla 8: Niveles de reducción de la dosis de dexametasona.**

| Dosis inicial    | Nivel de dosis -1 | Nivel de dosis -2 |
|------------------|-------------------|-------------------|
| 40 mg semanales  | 20 mg semanales   | 10 mg semanales   |
| 20 mg semanales* | 10 mg semanales   | -                 |

\* Pacientes > 75 años.

**Tabla 9: Directrices para el tratamiento de las toxicidades relacionadas con dexametasona.**

| Toxicidad                                                      | Medida                                                                                                                                                                          |
|----------------------------------------------------------------|---------------------------------------------------------------------------------------------------------------------------------------------------------------------------------|
| Dispepsia de grado 1-2                                         | Mantener la dosis y tratar con bloqueantes de los receptores de la histamina (H2) o equivalente. Reducir un nivel de dosis si los síntomas persisten.                           |
| Dispepsia de grado $\geq 3$                                    | Suspender la dosis hasta que los síntomas se controlen. Añadir un bloqueante de los receptores H2 o equivalente, y reducir un nivel de dosis cuando se reinicie el tratamiento. |
| Edema de grado $\geq 3$                                        | Administrar diuréticos según sea preciso, y reducir un nivel de dosis.                                                                                                          |
| Confusión o alteración del estado de ánimo de grado $\geq 2$ . | Suspender la dosis hasta que los síntomas se resuelvan. Cuando se reinicie el tratamiento se deberá realizar una reducción de un nivel de dosis.                                |
| Debilidad muscular (miopatía esteroidea) $\geq$ grado 2        | Suspender la administración de la dosis hasta que la debilidad muscular presente un grado $\leq 1$ . Cuando se reinicie el tratamiento se                                       |

|                                                                                |                                                                                                                                                                               |
|--------------------------------------------------------------------------------|-------------------------------------------------------------------------------------------------------------------------------------------------------------------------------|
|                                                                                | deberá realizar una reducción de un nivel de dosis.                                                                                                                           |
| Hiperglucemia de grado $\geq 3$                                                | Tratar con insulina o hipoglucemiantes orales, según sea preciso. Reducir un nivel de dosis                                                                                   |
| Pancreatitis aguda                                                             | Interrumpir la administración del tratamiento con dexametasona.                                                                                                               |
| Otros acontecimientos adversos relacionados con dexametasona de grado $\geq 3$ | Suspender la administración de la dosis hasta que el AE presente un grado $\leq 2$ . Cuando se reinicie el tratamiento se deberá realizar una reducción de un nivel de dosis. |

## 8.5 Pautas generales de reducción de dosis

### 8.5.1 Retrasos en la dosificación y modificaciones de la dosis (principios generales)

#### 8.5.1.1 Retraso del ciclo

El primer día de cada nuevo ciclo de tratamiento, y antes de cada dosis de daratumumab, bortezomib, selinexor y dexametasona, el paciente será evaluado por el médico que le esté tratando, para valorar posibles toxicidades que hayan podido suceder después de la/las dosis previas. Las toxicidades se determinarán con arreglo a la Versión 5 de los criterios NCI-CTCAE. Las modificaciones o retrasos de dosis se implementarán con arreglo a la toxicidad experimentada en el ciclo previo, o a la toxicidad descubierta *de novo* el Día 1 del ciclo a iniciar. Los parámetros que se requiere satisfacer el primer día de un ciclo nuevo (incluido ciclo 1) son:

- Recuento absoluto de neutrófilos  $\geq 1.000/\text{mm}^3$ , con o sin factores de crecimiento.
- Recuento de plaquetas  $\geq 100.000/\text{mm}^3$ , con o sin transfusiones de plaquetas.
- Nivel de hemoglobina  $>8,5 \text{ g/dL}$  con o sin transfusión, eritropoyetina, o ambos.
- Otras toxicidades clínicamente relevantes recuperadas a grado  $\leq 1$  o a situación basal, a menos que se especifique lo contrario en las pautas de modificación de dosis.

Si no se satisfacen los criterios que se acaban de especificar, el comienzo de un ciclo nuevo se retrasará por, como mínimo, una semana, y un máximo de cuatro semanas hasta la recuperación a los niveles especificados.

Si la toxicidad asociada al fármaco requiere un retraso en su administración superior a los 28 días, al paciente se le suspenderá el tratamiento. Sin embargo, si el investigador considera que el paciente está obteniendo un beneficio significativo de dicha terapia, esta podrá retrasarse más de 28 días, previo cambio de impresiones con los coordinadores del estudio.

Si concurre más de un tipo diferente de toxicidad, la modificación se verá determinada por la de grado más severo.

Las modificaciones de dosis o retrasos del tratamiento deben quedar registradas en el eCRD, incluyendo los motivos respectivos.

Siempre que sea posible, las toxicidades se deben atribuir específicamente a uno de los fármacos en estudio, de tal modo que las modificaciones de dosis puedan llevarse a cabo de un modo razonable, si procediera. La reducción de un único agente, y no de otros, es apropiada cuando se considera que la toxicidad está relacionada principalmente con uno de los agentes. Para los pasos de reducción de dosis y pautas de modificación de éstas, se debe acudir a las tablas previamente expuestas para cada uno de los fármacos.

Una vez implementada la reducción de dosis para una medicación, a menos que se especifique lo contrario en la tabla correspondiente, no debería realizarse un re-escalado de la dosis. Esto hace referencia a bortezomib, a menos que a juicio del investigador exista un beneficio clínico y un perfil de riesgo razonable y aceptable, y siempre con el consentimiento previo por parte de los coordinadores del ensayo. Por el contrario, el re-escalado de selinexor se permite, como se detalla en las secciones que abordan las toxicidades específicas.

## **9 PLAN DEL ESTUDIO Y PROCEDIMIENTOS**

Los procedimientos del estudio se describen en la Tabla 1 y en la Sección 9.2, abajo.

### **9.1 Número de paciente del estudio**

Cada paciente del estudio se identificará de modo individualizado mediante una combinación de su número de centro participante en el estudio y número de paciente. El número de centro participante y el número de paciente serán asignados automáticamente por el CRD del centro participante correspondiente. Con la firma del documento de consentimiento informado y el registro del paciente en el CRD, a cada paciente se le asignará un único número relativo al estudio, y conservará dicho número a lo largo de todo el estudio. Los números de los pacientes ni se reasignarán ni se reutilizarán por ningún motivo. Si el paciente no consigue comenzar a recibir la

administración del fármaco en estudio por el motivo que sea, dicho motivo se consignará en el Registro de Reclutamiento, y todos los datos disponibles en la visita basal se registrarán en el CRD.

Los pacientes se identificarán ante el promotor únicamente por su número asignado, fecha de nacimiento y sexo. El investigador debe conservar el registro original del paciente.

## **9.2 Descripción de los días del estudio**

A tener en cuenta: los procedimientos de la Visita de Reclutamiento pueden combinarse a discreción del investigador y del paciente.

### **9.2.1 Periodo de reclutamiento: Visita de screening o de selección (Dentro de los 28 días previos al inicio de la terapia)**

Los procedimientos previstos en este estudio se llevarán a cabo dentro de los 28 días previos al inicio de la terapia, tal y como se especifica en la Tabla 1. El investigador no debería repetir los procedimientos realizados como práctica clínica habitual, si éstos se realizaron dentro de la ventana de reclutamiento, y antes de la firma del documento de consentimiento informado (DCI). Los datos de los procedimientos asistenciales estándar forman parte del historial médico, y puede hacerse uso de ellos para el estudio. Estos datos incluyen:

- Consentimiento informado por escrito y firmado (atención a la edad el día en el que se firmó el consentimiento)
- Datos demográficos (fecha de nacimiento, edad, género, raza y etnicidad)
- Anamnesis
- Historial médico completo en relación con el MM
- Condiciones médicas en el momento presente (incluyendo síntomas basales del MM)
- ECG de 12 derivaciones, o exploración por GASM
- Solo en los pacientes con problemas oculares distintos a los que implican el uso de lentes de corrección, se requiere un examen oftalmológico completo y de agudeza visual en el momento del reclutamiento y en la visita final, incluyendo el examen con lámpara de hendidura para cataratas u otras anormalidades (*ver Tabla 1*)
- Se recomienda la realización de tipaje sanguíneo ABO y Rh, y el TAI (también conocido como prueba de Coombs indirecta) antes de la administración de daratumumab, y que al sujeto se le provea de una tarjeta con el grupo sanguíneo, que deberá llevar consigo durante la fase de tratamiento y hasta seis meses después de la última dosis de daratumumab. Es muy recomendable el fenotipado adicional de los hematíes.
- Determinaciones relacionadas con la enfermedad en el momento basal:

- Aspirado de médula ósea para determinar la influencia del MM mediante morfología, citometría de flujo, biología molecular y FISH, dentro de las dos semanas previas a la primera dosis
  - EFPS con inmunofijación, si procede.
  - EFPO con inmunofijación, si procede.
  - CLLs séricas
  - Evaluación de la enfermedad ósea mediante rayos X, TC, TC de baja dosis
- Valoración de enfermedad extramedular (cuando proceda) mediante RMN o PET-TC de cuerpo entero. Se debería repetir la misma técnica cada tres ciclos en caso de evidencia de enfermedad extramedular, para evaluar la respuesta de acuerdo con los criterios de respuesta del IMWG.
- Medicaciones concomitantes
- Revisión de los criterios de inclusión y exclusión
- Altura y peso
- Se calculará el ASC con arreglo a Dubois (Dubois *et al*, Arch Intern Medicine 1916 [4]) o Mosteller (Mosteller *et al*, N Eng J Med 1987 [5])
- EF completa y determinación del estado funcional ECOG (Oken *et al*, Am J Clin Oncol 1982 [6], Apéndice 1)
- RSC con diferencial
- Bioquímica sérica completa, incluyendo función renal y hepática; se requiere también la  $\beta_2$ -microglobulina
- Niveles cuantitativos de inmunoglobulinas
- Urianálisis
- TSH
- Pruebas de coagulación
- Para mujeres en edad fértil, test de embarazo de GCh sérica en los tres días previos a la primera dosis de los fármacos en estudio
- Evaluación de los EAs
- Determinación de serologías para VIH, VHB y VHC

## 9.2.2 Fase de tratamiento

### 9.2.2.1 Durante el Ciclo 1 y 2

Los pacientes recibirán semanalmente selinexor v.o., dexametasona v.o., daratumumab s.c. y bortezomib s.c.; y acudirán al hospital los días 1, 8, 15 y 22 de cada ciclo (de 5 semanas de duración cada uno de ellos). Los siguientes procedimientos se llevarán a cabo los días 1, 8, 15 y 22 ( $\pm 3$  días)

de los ciclos 1 y 2. Si no existe ninguna otra sintomatología, no se requieren pruebas adicionales dichos días:

- Peso y ASC
- Evaluación física orientada a los síntomas
- Revisión del historial médico en el momento basal, antes del inicio del tratamiento
- Revisión de los criterios de inclusión y exclusión
- Signos vitales (presión arterial, frecuencia cardíaca y temperatura)
- Condición médica en el momento presente
- Determinación del estado funcional ECOG (solo el día 1 de cada ciclo)
- ECG de 12 derivaciones (solo el día 1 de cada ciclo si se estima clínicamente necesario)
- Urianálisis (solo el día 1 de cada ciclo)
- Hemograma (RSC) con diferencial (los días 1, 8, 15 y 22 de cada ciclo)
- Bioquímica sérica completa (solo el día 1 de cada ciclo)
- Bioquímica sérica limitada (los días 8, 15 y 22 de cada ciclo)
- TSH (solo el día 1 de cada ciclo)
- Pruebas de coagulación (solo el día 1 de cada ciclo)
- EFPS (solo el día 1 de cada ciclo)
- EFPO (solo el día 1 de cada ciclo)
- Inmunofijación sérica y de orina (en caso de RC) (solo el día 1 de cada ciclo)
- CLLs séricas (solo el día 1 de cada ciclo)
- Dosificación de selinexor en el hospital los días 1, 8, 15 y 22 de los ciclos 1 y 2
- Administración de daratumumab los días 1, 8, 15 y 22 de los ciclos 1 y 2
- Administración de bortezomib los días 1, 8, 15 y 22 de los ciclos 1 y 2
- La dosificación de dexametasona se llevará a cabo como se ha indicado más arriba: los días en los que no se administre daratumumab, a una dosis de 40 mg v.o.; y los días en los que sí se administre daratumumab, 20 mg de dexametasona v.o. antes de la inyección de daratumumab, y 20 mg v.o. al día siguiente.
- EAs
- Medicaciones concomitantes

#### **9.2.2.2 Del Ciclo 3 al Ciclo 6**

En los que los pacientes recibirán selinexor y dexametasona v.o., más daratumumab s.c. dos veces al mes (los días 1 y 15) y bortezomib s.c. semanalmente (la semana 5 no se recibirá tratamiento). Acudirán a la clínica los días 1, 8, 15 y 22 de cada ciclo. Los siguientes procedimientos se llevarán a cabo los días 1, 8, 15 y 22 ( $\pm$  3 días) de los ciclos 3, 4, 5 y 6 (de 5 semanas cada uno). Solo se requieren

las pruebas de hemograma los días 1 y 15. Los pacientes tienen que regresar al hospital a recibir bortezomib los días 8 y 22. Si no existe ninguna sintomatología, no se requieren pruebas adicionales dichos días:

- Peso
- Signos vitales (presión arterial, frecuencia cardíaca y temperatura)
- Revisión del historial médico
- Evaluación física orientada a los síntomas
- Condición médica en el momento presente
- Determinación del estado funcional ECOG (solo el día 1 de cada ciclo)
- ECG de 12 derivaciones (solo el Día 1 de cada ciclo si se estima clínicamente necesario)
- Urianálisis (solo el día 1 de cada ciclo)
- Hemograma (RSC) con diferencial (los días 1, 8, 15 y 22 de cada ciclo)
- TSH (solo el día 1 de cada ciclo)
- Bioquímica sérica completa (solo el día 1 de cada ciclo)
- Bioquímica sérica limitada (el día 15 de cada ciclo)
- Pruebas de coagulación (solo el día 1 de cada ciclo)
- EFPS (solo el día 1 de cada ciclo)
- EFPO (solo el día 1 de cada ciclo)
- Inmunofijación sérica y de orina (en caso de RC) (solo el día 1 de cada ciclo)
- CLLs séricas (solo del Día -4 al día 1 de cada ciclo)
- Dosificación de selinexor (días 1, 8, 15 y 22 de los ciclos del 3 al 6; se suministrará al paciente para que se autoadministre el resto de días en los que su uso esté programado)
- La administración de dexametasona v.o. se llevará a cabo en el hospital, los días 1 y 15 de los ciclos del 3 al 6, como parte de la premedicación antes de la inyección de daratumumab. El resto de dosis de dexametasona se administrarán también v.o.
- La dosificación de daratumumab se llevará a cabo por vía s.c los días 1 y 15 de los ciclos del 3 al 6
- La dosificación de bortezomib se llevará a cabo por vía s.c los días 1, 8, 15 y 22 de los ciclos del 3 al 6
- EAs
- Medicaciones concomitantes
- Después de completar el ciclo 4, para confirmar la RC se realizará -si procede- un aspirado y/o biopsia de médula ósea y se determinará la EMR.

### 9.2.2.3 *Del Ciclo 7 en adelante*

Los pacientes recibirán selinexor y dexametasona por v.o., más daratumumab s.c. una vez cada 5 semanas, el día 1 de cada nuevo ciclo. Ese día los pacientes deberán acudir al hospital. Los siguientes procedimientos se llevarán a cabo el día 1 ( $\pm$  3 días) del Ciclo 7 y de los ciclos posteriores. Los pacientes también acudirán al hospital para la administración de bortezomib por vía s.c. los días 1, 8, 15 y 22 durante los ciclos 7 y 8, y los días 1 y 15 a partir del Ciclo 9 en adelante.

Si no existe ninguna sintomatología, no se requieren pruebas adicionales en estos días:

- Peso
- Signos vitales (presión arterial, frecuencia cardíaca y temperatura)
- Evaluación física orientada a los síntomas
- Condición médica en el momento presente
- Determinación del estado funcional ECOG
- ECG de 12 derivaciones (solo el día 1 de cada ciclo si se estima clínicamente necesario)
- Hemograma (RSC) con diferencial
- Bioquímica sérica completa
- Urianálisis
- Pruebas de coagulación
- EFPS (solo el día 1 de cada ciclo)
- EFPO (solo el día 1 de cada ciclo)
- Inmunofijación sérica y de orina (en caso de RC) (solo el día 1 de cada ciclo)
- CLLs (solo el día 1 de cada ciclo)
- TSH (solo el día 1 de cada ciclo)
- Dosificación de selinexor, en el hospital solo el día 1 de cada ciclo; para el resto de días, se suministrará al paciente la medicación para autoadministración
- La dosificación de dexametasona se llevará a cabo en el hospital por vía oral el Día 1 de cada ciclo, como parte de la premedicación antes de la inyección de daratumumab. El resto de días se administrará también por v.o.
- La dosificación de daratumumab se llevará a cabo por vía s.c. en la clínica el día 1 de cada ciclo de 5 semanas.
- La dosificación de bortezomib se llevará a cabo por vía s.c. los días 1, 8, 15 y 22 de los ciclos 7, 8; y los días 1, 15 a partir del ciclo 9.
- EAs
- Medicaciones concomitantes

### 9.2.3 Visita final

Los procedimientos del estudio se llevarán a cabo 30 ( $\pm$  7) días después de la última dosis de la medicación de estudio en todos los pacientes, incluyendo los que finalicen prematuramente, como se especifica en la Tabla 1:

- Peso
- Signos vitales (presión arterial, frecuencia cardíaca y temperatura)
- Determinación del estado funcional ECOG
- Examen oftalmológico completo y de agudeza visual, incluyendo el examen con lámpara de hendidura para cataratas u otras anormalidades (para una descripción detallada, consultar Tabla 1)
- ECG de 12 derivaciones
- Bioquímica sérica completa
- Hemograma (RSC) con diferencial
- Pruebas de coagulación
- Urianálisis
- EFPS
- EFPO
- CLLs
- TSH
- Test sérico de embarazo (para mujeres fértiles)
- Inmunofijación sérica y de orina (en caso de RC)
- Niveles cuantitativos de inmunoglobulinas
- EAs
- Medicaciones concomitantes
- Terapia antineoplásica tras el final del tratamiento con selinexor-dexametasona más bortezomib y daratumumab, si procede
- Motivo de la Visita Final: toxicidad, PE, recaída de la enfermedad, retirada del consentimiento informado...

### 9.2.4 Visitas de seguimiento

Existen visitas de seguimiento de los pacientes cada 30 días, a ser posible de presencia física en el hospital, o en su defecto mediante contacto telefónico. Se requieren estas visitas de seguimiento cada 30 días en los casos de los pacientes que suspendan el tratamiento y que no hayan recaído, o

experimentado PE, en la visita del final del tratamiento. Los pacientes para los que el motivo de la Visita Final sea la PE, pueden pasar directamente al seguimiento de supervivencia.

El periodo de seguimiento y supervivencia máximo para cada paciente se establece en 24 meses desde la fecha de última administración de fármaco en investigación.

Durante este contacto con el paciente, la información más importante a obtener incluye:

- Situación médica en el momento presente, y estatus del MM
- Seguimiento de cualquier EA que no se hubiera resuelto durante la Visita Final del estudio
- Notificación de nuevos EAG que se estime puedan tener relación con alguno de los productos en investigación
- Información acerca de cualquier terapia antineoplásica empleada desde la suspensión del tratamiento con selinexor-dexametasona más bortezomib y daratumumab.

### 9.2.5 Seguimiento de la supervivencia

Tras la salida del estudio del paciente y una vez se haya confirmado la progresión de la enfermedad, se iniciará el periodo de seguimiento de supervivencia. Durante el mismo se realizará una llamada de teléfono al paciente (o a su familia) cada tres meses, para recoger la situación de la enfermedad, así como el inicio de nuevas líneas de tratamiento anti-mieloma (si aplica), desde la suspensión del tratamiento con SDVd.

## 10 ALMACENAMIENTO DE LOS FÁRMACOS

### 10.1 Selinexor

Selinexor es un SINE™ que bloquea selectivamente la exportación nuclear mediante su unión irreversible a XPO1. Su denominación química es: (Z)-3-(3-(3,5-bis(trifluorometil)fenil)-1H-1,2,4-triazol-1-yl)-N'-(pirazina-2-yl) acrylohidrazida. La fórmula molecular es: C<sub>17</sub>H<sub>11</sub>F<sub>6</sub>N<sub>7</sub>O. El peso molecular es 443,31 g/mol.

Selinexor se suministrará, y administrará, en forma de comprimidos de 20 mg, recubiertos, de liberación inmediata. Los comprimidos de selinexor deben almacenarse a 86 °F (30 °C) o menos, en lugar cerrado y seguro, con acceso restringido al personal de farmacia, o al personal específicamente designado, a temperatura ambiente o refrigerada (es preferible la primera opción). Los comprimidos no deben almacenarse a temperaturas de congelación. Los comprimidos se suministrarán en una película plástica con recubrimiento de aluminio en la parte posterior, dentro de un estuche a prueba de niños. Los comprimidos de selinexor están siendo objeto de estudios de estabilidad en el momento actual. La caducidad se apoyará en estos estudios de

estabilidad concurrentes, cuyos resultados, conforme vayan apareciendo, se tendrán en cuenta para actualizar dicho apartado. No se requiere una preparación especial.

La preparación, manejo y eliminación segura del agente citostático se llevará a cabo dentro de un entorno independiente y protegido, por personal cualificado y familiarizado con los procesos, de manera que se minimice la exposición indebida del propio personal del centro y del ambiente.

Selinexor es un fármaco en investigación y será suministrado, gratuitamente, por Karyopharm Therapeutics, Inc. a PETHEMA. Durante el transcurso del presente estudio, selinexor ha sido autorizado por la FDA para el tratamiento, en combinación con dexametasona, de pacientes adultos con mieloma múltiple en recaída/refractario (RRMM) que han recibido al menos cuatro terapias previas y cuya enfermedad es resistente a otras formas de tratamiento, incluyendo al menos dos inhibidores de proteasoma, dos agentes inmunomoduladores y un anticuerpo monoclonal anti-CD38.

NOTA: Los comprimidos de selinexor no deben triturarse, a causa del incremento de riesgo de toxicidad dermatológica si el polvo entra en contacto con la piel.

Al comienzo del ensayo se harán llegar los documentos de petición del fármaco, con toda la información de contacto requerida junto con la recomendación de cantidades a solicitar, iniciales y datos de reabastecimiento. Los pedidos enviados vía *e-mail* se atenderán dentro de los cinco días laborables posteriores a su recepción.

El investigador, o algún responsable designado por él, debe realizar un escrupuloso seguimiento de las existencias y la situación del fármaco, empleando el *NCI Drug Accountability Record* o cualquier otro formulario similar de recuento de fármacos (ver la página web del *Cancer Therapy Evaluation Program* [CTEP] en <http://ctep.cancer.gov/protocolDevelopment> para consultar las “Normas y pautas acerca del recuento y almacenamiento de agentes en investigación”, o para obtener una copia del Formulario de Recuento de Fármacos).

Al final del estudio, el selinexor suministrado y no empleado se deberá destruir con arreglo a las políticas de la institución. La destrucción quedará registrada en el Formulario de Recuento de Fármacos.

## **10.2 Dexametasona**

Los comprimidos de dexametasona deben almacenarse tal y como recomienda la etiqueta del producto. Deben mantenerse en el envase en el que llegaron, que se mantendrá herméticamente cerrado y fuera del alcance de los niños. Conservar a temperatura ambiente, evitando humedad y calor excesivos (no guardar en el cuarto de baño).

## **10.3 Daratumumab**

El daratumumab suministrado para este estudio es un preparado de aproximadamente 16 mL que contiene 1800 mg de daratumumab, líquido, estéril, entre incoloro y amarillo. Se recomienda consultar el Manual del Investigador para ver la lista de excipientes [56]. Daratumumab se presenta en viales de cristal.

Las etiquetas del fármaco en estudio contendrán información de acuerdo con los requerimientos regulatorios aplicables. Cada vial contendrá una etiqueta específica del estudio, con un número de identificación único.

Todos los viales con el fármaco de estudio se almacenarán en su embalaje original a temperaturas controladas, en un refrigerador a 2-8 °C, y no deberán emplearse pasada la fecha de caducidad impresa en la etiqueta. El producto no debe exponerse a la luz solar directa, y no debe congelarse. Daratumumab no contiene preservantes; por tanto, cualquier cantidad de material que quede sin usar en el vial, debe desecharse.

Daratumumab debe ser filtrado durante su preparación. Consulte las instrucciones de preparación del producto o el manual de procedimientos del producto en investigación para obtener detalles sobre la preparación de dosis y el almacenamiento. Al final del estudio, los suministros de daratumumab que no se hayan usado deben ser destruidos con arreglo a las políticas de la institución. La destrucción quedará registrada en el Formulario de Recuento de Fármacos.

## **10.4 Bortezomib**

Bortezomib es un agente citotóxico. Por tanto, se debe ser precavido durante su manejo y preparación. Se recomienda el uso de guantes y de otra ropa de protección para prevenir el contacto con la piel. La asepsia debe observarse estrictamente a lo largo de todos los procesos de manejo de bortezomib, ya que este no contiene agentes preservantes.

Bortezomib se administrará preferiblemente por vía s.c., y su etiqueta contendrá la información necesaria para satisfacer los requerimientos regulatorios correspondientes. La vía i.v. para la

administración de bortezomib solo se considerará en caso de reacción severa en el sitio de inyección s.c.

La solución reconstituida debe emplearse inmediatamente después de su preparación. Si no se procede de este modo, serán responsabilidad del usuario los tiempos y las condiciones de almacenamiento antes de su administración al paciente. Sin embargo, se ha demostrado una estabilidad química y física de la solución reconstituida de 8 horas a 25 °C, almacenada en el vial original y/o en una jeringa. El tiempo total de almacenamiento del medicamento reconstituido no debe superar, antes de su administración, las ocho horas.

No se debe almacenar por encima de 30 °C. El vial se debe mantener en el embalaje externo para protegerlo de la luz.

Consultar la página del manual del producto en investigación para conocer pautas adicionales relativas a la preparación del fármaco en estudio, así como su manejo y su almacenamiento.

Al final del estudio, los suministros de bortezomib que no se hayan usado deben ser destruidos con arreglo a las políticas de la institución. La destrucción quedará registrada en el Formulario de Recuento de Fármacos.

## **11 RECuento DE LOS FÁRMACOS**

El investigador es responsable de asegurarse de que todos los fármacos del estudio recibidos en su centro son inventariados y contabilizados a lo largo de todo el estudio. El fármaco en estudio administrado al sujeto debe quedar registrado en el Formulario de Recuento de Fármacos. Todos los fármacos en estudio deben almacenarse y eliminarse con arreglo a las instrucciones del promotor. El personal del centro en el que se lleve a cabo el estudio no debe combinar los contenidos de los envases de los fármacos en estudio.

Los fármacos en estudio deben manipularse siguiendo estrictamente las instrucciones del protocolo y de la etiqueta del envase, y deben almacenarse en el centro participante en el estudio en un área de acceso restringido o en un armario o vitrina cerrado, siempre en las condiciones ambientales apropiadas. El fármaco en estudio que no se haya usado debe estar disponible, en cada centro participante, para su verificación por parte del monitor del promotor, durante sus visitas de supervisión. La devolución del fármaco no empleado en el estudio al promotor quedará registrada en el documento de destrucción del producto en investigación. Cuando el centro participante posea la autorización para deshacerse de medicamentos de estudio, y las reservas de los fármacos se destruyen *in situ*, debe consignarse este hecho en el documento de destrucción del producto en

investigación. Los materiales potencialmente peligrosos tales como ampollas usadas, agujas, jeringas y viales que contengan líquidos peligrosos, deben ser eliminados inmediatamente de un modo seguro, y por tanto no se retendrán por motivos de recuento.

La eliminación del fármaco en estudio debe llevarse a cabo bajo la supervisión del investigador o de un miembro cualificado del personal del centro participante, o debe llevarla a cabo un farmacéutico del hospital. Se suministrará el fármaco en estudio únicamente a los pacientes participantes en el estudio. El fármaco en estudio devuelto no se volverá a distribuir, ni siquiera al mismo paciente. El fármaco en estudio no se debe reetiquetar, ni reasignar a otros sujetos para su uso. El investigador se compromete a no dispensar el fármaco en estudio, ni a almacenarlo, en otros centros que no sean los centros participantes en el estudio convenidos con el promotor.

## **12 MEDICACIONES CONCOMITANTES**

### **12.1 Pautas generales**

A lo largo del estudio, los investigadores pueden prescribir cualquier medicación concomitante o tratamiento que consideren necesarios para suministrar el cuidado de soporte apropiado, excepto los especificados en la Sección 12.4 (Terapias prohibidas). Todas las medicaciones, incluidos los productos sin receta y las transfusiones, deben ser consignadas a lo largo de todo el estudio, desde la firma del DCI hasta 30 días después de la última dosis de cualquier producto del régimen de tratamiento, o hasta el inicio del tratamiento antineoplásico posterior, si este se produce antes. El promotor debe ser puesto sobre aviso previamente a (o tan pronto como sea posible después de) cualquier situación en la que se vayan a administrar (o se hayan administrado) sustancias prohibidas.

### **12.2 Terapias recomendadas**

#### **- Terapia con bifosfonatos**

Se recomienda encarecidamente el empleo de bifosfonatos en todos los pacientes con evidencia de destrucción lítica del hueso o con osteopenia, con arreglo a las Pautas para la Práctica Clínica de la *American Society of Clinical Oncology* (ASCO), a menos que dicha terapia esté contraindicada específicamente (Kyle *et al*, J Clin Oncol 2007 [57]). Si la terapia con bifosfonatos no hubiera comenzado antes del inicio del estudio, deberá iniciarse durante la primera semana después de la primera dosis. La terapia con bifosfonatos debe proseguir a lo largo de toda la fase de tratamiento, hasta que se produzca la PE. Se prefiere el uso de bifosfonatos administrables por vía i.v. y que estén comercialmente disponibles (pamidronato y ácido zoledrónico). Deben emplearse con arreglo a las instrucciones del fabricante, tal y como se describa en la ficha técnica en relación con

los sujetos con enfermedad ósea mielomatosa osteolítica u osteopénica.

**- Profilaxis para reactivación de virus hepatitis B (VHB)**

En caso de que el paciente presente en el screening basal detección de anticuerpos dirigidos frente a HBsAg o frente a antígenos del core de la hepatitis B [HBcAg]: anti-HBs y anti-HBc, respectivamente) y sin presencia del antígeno de superficie de la hepatitis B [HBsAg], se recomienda establecer profilaxis ante una posible reactivación, así como revisiones periódicas conforme a criterio clínico. La monitorización clínica y analítica de la reactivación del VHB deberá mantenerse al menos hasta seis meses después del finalizado el tratamiento con daratumumab.

En los pacientes que presenten reactivación del VHB mientras están en tratamiento con daratumumab, se deben suspender el tratamiento con daratumumab, cualquier esteroide concomitante y otra quimioterapia, e instaurar el tratamiento adecuado para tratar la infección. En los pacientes en los que se consiga controlar la reactivación del VHB, la reanudación del tratamiento con daratumumab debe discutirse con médicos con experiencia en el manejo del VHB.

**- Profilaxis para la reactivación del Herpes Zoster**

Se recomienda la profilaxis para la reactivación de herpes zoster durante la fase de tratamiento. La terapia antiviral aceptable incluye: Aciclovir 400 mg administrados por vía oral 2 veces al día, u 800 mg administrados por vía oral dos veces al día; o Valacyclovir 500 mg administrado por vía oral 2 veces al día o según las pautas institucionales, iniciado dentro de la semana en la que se administra la primera dosis.

**- Terapia para *Pneumocystis jirovecii***

Debe considerarse la profilaxis de la neumonía por *Pneumocystis jirovecii*, con arreglo a las pautas de cada institución.

**- Antagonistas de 5-HT3**

Con objeto de minimizar las náuseas asociadas a selinexor, todos los pacientes deben recibir antagonistas de 5-HT3 (8 mg de ondansetrón o equivalente) a menos que esté específicamente contraindicado; comenzando antes de la primera dosis de Selinexor y continuando de dos a tres veces al día según la necesidad.

**- Cuidados de soporte en relación a selinexor y dexametasona**

Durante la administración de selinexor y dexametasona deben aplicarse medidas de soporte para un cuidado médico óptimo. A la vista de las observaciones clínicas en más de 400 pacientes adultos tratados con selinexor a partir del 31 de mayo de 2014, los efectos secundarios principales se asocian con anorexia con poco consumo calórico y de fluidos, astenia y náuseas. También se observa trombocitopenia, aunque raramente asociada a sangrados. Además de la dexametasona incluida en el plan estándar de tratamiento, y de la requerida profilaxis con antagonistas 5-HT3, se

deben administrar cuidados de soporte que incluyan terapias antieméticas, gastroprotectoras (inhibidores de la bomba de protones y/o bloqueantes H2) y otros, según se describe a continuación:

- **Estimulantes del apetito:** acetato de megestrol a una dosis diaria de 80-400 mg.
- **Agentes de acción central:** consultar las Pautas de Práctica Clínica® del NCCN para antiemesis y anorexia/caquexia (cuidados paliativos) (ver Apéndice 5 (antiemesis) y Apéndice 6 (anorexia), respectivamente).
- **Antagonista del receptor de la neuroquinina 1 (NK1R):** se debería considerar el uso de aprepitant, o equivalente, especialmente indicado en los pacientes con náuseas severas y vómitos.
- Se recomienda el empleo profiláctico de plaquetas en los pacientes que presenten, antes de entrar en el estudio o durante éste, recuentos plaquetares  $\leq 100.000/\mu\text{L}$ .
- Se ha visto que el consumo calórico e hidratación apropiados, incluyendo bebidas ricas en electrolitos más que simple agua, puede conducir a la reversión de la hiponatremia, un efecto secundario frecuentemente asociado a selinexor. Debe descartarse la pseudohiponatremia motivada por niveles de glucosa elevados, y deben corregirse los niveles séricos de sodio. Si la hiponatremia persiste a pesar de la mejora en la hidratación, se recomienda el empleo de suplementos salinos. Si la hiponatremia continúa, entonces debe descartarse el síndrome de secreción inadecuada de hormona antidiurética (SIADH), así como patologías cardíacas, hepáticas, adrenales, renales y tiroideas (que pueden, todas ellas, causar hiponatremia).
- En los pacientes que presenten fiebre u otros signos de infección sistémica, debe instaurarse de inmediato el uso i.v. de antibióticos y antifúngicos de amplio espectro. Se debe suspenderse selinexor en todos los pacientes con infección de grado 4 o sepsis clínica (en ausencia de infección documentada), hasta que la condición se estabilice. Se podrá entonces reiniciar el selinexor a la misma dosis.
- La actitud a seguir frente a los efectos secundarios de los glucocorticoides es bien conocida y no difiere del manejo estándar. Se recomienda el empleo de inhibidores de la bomba de protones, antihipertensivos y otros, con objeto de poder mantener el uso intermitente de dexametasona en combinación con selinexor.
- Los pacientes con osteopenia u osteoporosis documentadas deben continuar tomando dexametasona en combinación con selinexor tal y como se indica en el presente estudio. A menos que se contraindique, deben adoptarse las precauciones estándar, tales como el uso de bifosfonatos.

### 12.3 Terapias permitidas

Los pacientes podrán recibir medicaciones concomitantes para tratar síntomas, EAs y enfermedades intercurrentes cuando sea clínicamente necesario como parte de los cuidados estándar. Se permiten medicaciones para tratar enfermedades concomitantes como la diabetes, hipertensión, etc.

Las siguientes medicaciones y terapias de soporte son ejemplos de medidas de soporte que pueden emplearse durante este estudio:

- Factores estimuladores de colonias, eritropoyetina, heparina y transfusión de plaquetas y hematíes (si clínicamente indicadas), según las normas del centro.
- Se recomienda la loperamida para el tratamiento de la diarrea, pudiendo comenzar al mismo tiempo que la aparición de las primeras heces acuosas. Dosis y régimen de loperamida seguirán las pautas de cada centro. No se recomienda la loperamida en régimen profiláctico. Es importante prevenir el estreñimiento (p.ej. con una hidratación adecuada, dieta alta en fibra y, si fuera necesario, laxantes).
- Radioterapia: si está clínicamente indicado, se permite la radioterapia paliativa sobre las lesiones que no son el objetivo del tratamiento, pero el fármaco en estudio debe suspenderse durante  $\geq 1$  día antes del inicio de la radioterapia paliativa, y hasta  $\geq 1$  día después de cada dosis de ésta. El tratamiento con selinexor, dexametasona y daratumumab no se suspenderá por motivo exclusivamente de la radioterapia paliativa.
- Se recomienda una hidratación adecuada para la prevención de la enfermedad renal asociada al mieloma.
- Antieméticos profilácticos, con la excepción de corticosteroides.

### 12.4 Terapias prohibidas

En este estudio no existen restricciones de dieta. Los pacientes que tomen selinexor deben mantener un aporte calórico e hidratación adecuados.

Otras terapias antineoplásicas con intención de tratar el MM: estas terapias están prohibidas, incluidas las terapias cuyo objetivo es CD38. La continuación del tratamiento durante o tras la cirugía ortopédica de emergencia o radioterapia, en beneficio del sujeto, puede darse solo en ausencia de PE, y tras consultar con el promotor y recibir su aprobación. Tal emergencia radioterápica puede consistir en radioterapia localizada para control del dolor o para la estabilización de una lesión ósea extensa con riesgo alto de fractura patológica o daño de los tejidos circundantes, en un paciente en el cual no sea conveniente el retraso de la terapia sistémica. Tal

radioterapia debe llevarse a cabo dentro de los dos primeros ciclos de tratamiento y se debe revisar la ausencia de evidencia de PE. Adicionalmente debe ser aprobada por el promotor.

La administración concomitante de otros productos en investigación está prohibida: debe evitarse el empleo de agentes disponibles comercialmente con actividad contra el MM o en investigación en dicho contexto, aparte de los agentes administrados para las reacciones relacionadas con la infusión, tal y como se describe en la Sección 8.1.5, incluyendo los corticosteroides sistémicos (>10 mg de Prednisona al día, o equivalente). Los agentes antiinflamatorios no esteroideos deben evitarse como medida para minimizar el riesgo de enfermedad renal asociada al mieloma. Debido al riesgo de afectación renal, clásicamente NO se emplea el contraste i.v. en el estudio por TC de los sujetos con MM secretor. Si la administración de contraste i.v. fuera necesaria, se deberán implementar las precauciones apropiadas, incluida la hidratación.

Los pacientes no deben tomar productos que contengan GSH, S-adenosilmetionina (SAM) o N-acetilcisteína (NAC) durante su participación en este estudio, ya que estos productos pueden acelerar el metabolismo de selinexor. Sin embargo, se permitirá su uso si el paciente presenta pruebas de función hepática alteradas. Durante este estudio, los pacientes deben dar cuenta a sus médicos de todos los fármacos que toman, prescritos y no prescritos.

Aunque en estudios previos se limitó el empleo del acetaminofén en combinación con selinexor debido a teóricas interacciones con GSH, unos ensayos de seguridad actualmente en curso acerca del uso conjunto de estos fármacos no han podido demostrar la existencia de anormalidades clínicas o de laboratorio relevantes con dosis de acetaminofén de hasta 1 g, y de selinexor de hasta 55 mg/m<sup>2</sup> (aproximadamente 80-100 mg). Por tanto, en lo sucesivo no existen restricciones relativas al uso de acetaminofén, o productos que lo contengan, en combinación con selinexor.

### **13 CUMPLIMIENTO DEL TRATAMIENTO**

El investigador, u otra persona del *staff* del estudio, supervisarán el tratamiento con el fármaco de estudio que se suministra en el centro, e instruirá al paciente acerca de la auto-administración de la medicación en estudio.

Se pedirá a los pacientes traer consigo el envase de la medicación de estudio en cada visita, y el cumplimiento, con arreglo al protocolo previsto, de la toma del fármaco en estudio; lo cual se comprobará mediante el recuento de los comprimidos.

El grado de cumplimiento será documentado por personal del estudio tras cambio de impresiones con el paciente y recuento del fármaco. El investigador, o la persona en la que éste delegue, registrará en los documentos fuente la adherencia al tratamiento en estudio. La fecha será

registrada con arreglo al cronograma previsto del fármaco en estudio. El investigador, o la persona designada, contabilizará el número de comprimidos dispensados vs. el número de ellos devueltos por el paciente. Cualquier desviación o dosis perdida deberá consignarse en el eCRD y en los registros de recuento del fármaco para su verificación, con los motivos.

El investigador, o la persona designada, intentará garantizar el cumplimiento completo del cronograma de dosis programadas, facilitando instrucciones a los pacientes relativas al citado cronograma. En caso de falta de cumplimiento, se volverá a instruir a los pacientes acerca de los tiempos.

## **14 REQUISITOS DE CONTRACEPCIÓN**

Las pacientes no deben quedar embarazadas, ni los pacientes concebir un hijo, mientras permanezcan en el estudio, debido a que los tratamientos dispensados en este pueden afectar al feto. Las mujeres no deben amamantar a un niño durante la duración de este estudio. Es importante que los pacientes sean conscientes de la importancia del empleo de métodos fiables de control del embarazo mientras dure el estudio. Las mujeres en edad fértil deben comprometerse a emplear dos métodos de contracepción (uno altamente efectivo y uno efectivo), y tener un test de embarazo negativo en el momento del reclutamiento; y los pacientes masculinos, si son sexualmente activos con una mujer potencialmente capaz de engendrar un hijo, deben emplear un método contraceptivo de barrera efectivo.

Los métodos altamente efectivos incluyen:

- Contraceptivos hormonales (p.ej., contraceptivos hormonales combinados, parches anticonceptivos, anillos vaginales, inyectables e implantes)
- Dispositivos o sistemas intrauterinos
- Vasectomía o ligadura de trompas

Los métodos efectivos incluyen:

- Métodos contraceptivos de barrera (p.ej., preservativo masculino, preservativo femenino, capuchón cervical, diafragma, esponja contraceptiva)

Notas:

- Ningún método de barrera constituye, por sí mismo, un estándar de alta eficacia contraceptiva.
- El uso correcto del diafragma o del capuchón cervical incluye el uso de espermicida, y es considerado como un método de barrera.

- El capuchón cervical y la esponja contraceptiva son menos eficaces en las mujeres que ya han tenido hijos antes.
- El uso únicamente de espermicida no se considera un método contraceptivo de barrera conveniente.
- Cuando se emplean sistemática y correctamente, los métodos contraceptivos “de doble barrera” (p.ej., el preservativo masculino más el diafragma, o preservativo masculino más capuchón cervical) constituyen una eficaz alternativa a los métodos altamente eficaces de contracepción descritos más arriba.
- Los preservativos masculino y femenino no deben emplearse juntos, ya que podrían rasgarse o dañarse.

Alternativamente, las siguientes condiciones satisfacen los requisitos de contracepción:

- Una pareja sexual esterilizada quirúrgicamente o post-menopáusica.
- La abstinencia total (real) (cuando ello está en línea con el estilo de vida preferido y habitual del paciente) es un método aceptable de contracepción. NOTA: la abstinencia periódica (p.ej. con arreglo a calendario, ovulación, sintotérmica, métodos postovulatorios) y la retirada no son métodos contraceptivos aceptables.

Debe explicarse a los pacientes potenciales, tanto masculinos como femeninos, cuáles se consideran métodos contraceptivos aceptables. En el momento de dar su consentimiento a participar en el estudio los pacientes deben comprometerse a emplear, para poder ser reclutados, los métodos de control de natalidad descritos previamente a lo largo de todo el estudio y durante los tres meses posteriores a la última dosis del tratamiento con bortezomib, daratumumab y selinexor.

En lo que concierne a bortezomib, no existen datos clínicos disponibles en relación con la exposición al fármaco durante el embarazo. El potencial teratogénico de bortezomib no se ha investigado a fondo; por tanto, bortezomib no debe emplearse durante el embarazo a menos que la condición clínica de la mujer requiera dicho tratamiento.

En lo que respecta a daratumumab, no existen datos, humanos o animales, que ayuden a determinar el riesgo asociado a su uso durante el embarazo. Por tanto, daratumumab no se debe emplear durante este periodo a menos que se considere que puedan pesar más para la mujer los beneficios asociados a su empleo que los riesgos potenciales para el feto. Se sabe que los AcMo IgG1 son capaces de atravesar la placenta después del primer trimestre de embarazo; en cualquier

caso, se ignora si daratumumab se excreta con la leche humana o animal, y se desconoce su efecto sobre los recién nacidos.

De este modo, es necesario en estos casos adoptar una decisión acerca de si se debe interrumpir la lactancia o se debe suspender la terapia con daratumumab, sopesando el beneficio de la lactancia para el niño frente al beneficio de la terapia para la mujer.

No existen datos para determinar los efectos potenciales de daratumumab sobre la fertilidad.

## **15 MÉTODOS DE EVALUACIÓN Y OBJETIVOS DE ANÁLISIS**

### **15.1 Datos demográficos**

En la Visita de Reclutamiento se recogerán los datos demográficos del paciente. Estos incluyen año de nacimiento, edad y género.

### **15.2 Historial médico**

En el reclutamiento se debe obtener un historial médico completo de cada paciente. Este incluirá síntomas de partida, así como una historia detallada de procedimientos previos relacionados con el MM y otras terapias antitumorales previas (p.ej., quimioterapia, terapia hormonal, inmunoterapia, radioterapia y cirugía) incluyendo fechas de inicio y finalización, mejor respuesta, PE durante o tras la terapia, así como suspensiones debidas a intolerancia o toxicidad. En cuanto a daratumumab, es importante el historial médico pasado en lo concerniente a EPOC o asma documentados o sospechados.

### **15.3 Medicaciones concomitantes**

Las medicaciones concomitantes empleadas por cada paciente quedarán consignadas en cada una de las visitas programadas, con énfasis en recabar datos acerca de cuidados de soporte tales como factores de crecimiento, eritropoyetinas, soporte transfusional y cuidados de soporte necesarios tales como estimulantes del apetito, antieméticos y antidiarreicos.

### **15.4 Exploración física y escala ECOG**

La EF completa en la Visita de *Screening* o Selección debe incluir aspecto general, piel, cuello, ojos, oídos, nariz, garganta, pulmones, corazón, abdomen, espalda, ganglios linfáticos, extremidades y examen neurológico. Todas las demás EFs a lo largo del estudio deben estar orientadas a los síntomas, lo cual puede incluir la revisión de los sistemas orgánicos que se considere procedente.

Excepto donde se especifique lo contrario, las EFs incluirán lo siguiente:

- Altura (sin zapatos) en centímetros (cm), medida en la Visita de *Screening* o Selección
- Peso corporal (ropa interior sin zapatos) en kilogramos (kg) el primer día de cada nuevo ciclo
- Presión arterial sistólica y diastólica, y frecuencia cardíaca, determinados en cada visita

La información acerca de la EF debe figurar en la documentación fuente en el centro participante en el estudio. Los resultados de la EF previa al inicio del tratamiento deben incluirse en la sección del eCRD relativa a Historial Médico Relevante/Condición Médica Vigente. Los hallazgos médicos relevantes obtenidos después del inicio del tratamiento que satisfagan la definición de un EA, deben registrarse en la sección del eCRD relativa a los EAs.

El día 1 de cada ciclo debe llevarse a cabo una determinación del valor de la escala funcional ECOG.

### **15.5 Evaluación de enfermedad ósea (examen esquelético, TC o TC de baja dosis o PET-TC)**

La evaluación de la enfermedad ósea se llevará a cabo en la Visita de *Screening* o Selección. Si se ha realizado PET-TC para su evaluación y fuera positiva, debería ser repetida si el paciente alcanza Respuesta Completa. No obstante, para todas las técnicas de imagen, se pueden realizar siempre que esté clínicamente indicado. Es aconsejable que, a lo largo de toda la duración del tratamiento en estudio, se emplee siempre la misma técnica de imagen para la evaluación del paciente, cuando ésta esté indicada.

#### **15.5.1 Interferencia con la determinación de la respuesta completa**

Daratumumab es un anticuerpo monoclonal IgG kappa humano que se puede detectar tanto en la electroforesis de proteínas séricas (SPE) como en los ensayos de inmunofijación (IFE) utilizados para la monitorización clínica de la proteína M endógena (ver sección 4.5). Esta interferencia puede afectar la determinación de la respuesta completa y la progresión de la enfermedad en algunos pacientes con proteína de mieloma IgG kappa.

#### **15.5.2 Interferencia en la electroforesis de proteínas séricas y pruebas de inmunofijación**

Daratumumab puede detectarse en electroforesis de proteínas séricas (SPE) y ensayos de inmunofijación (IFE) utilizados para controlar las inmunoglobulinas monoclonales de la enfermedad (proteína M). Esto puede conducir a resultados de ensayo de SPE e IFE falsos positivos para pacientes con proteína de mieloma IgG kappa que afectan la evaluación inicial de respuestas completas según los criterios del IMWG. En pacientes con RPMB), donde se sospecha de una interferencia con daratumumab, considere usar un ensayo IFE específico de daratumumab validado para distinguir daratumumab de cualquier proteína M endógena remanente en el suero del paciente, para facilitar la determinación de una RC, como SEBIA HYDRASHIFT 2 / 4 DARATUMUMAB.

## 15.6 Determinaciones relacionadas con la seguridad

Se determinará la seguridad con arreglo a los EAs, resultados de pruebas de laboratorio, ECGs, determinaciones de signos vitales, hallazgos en la EF, y estatus funcional con arreglo al valor de la escala ECOG. Todas las toxicidades se graduarán con arreglo a la Versión 5 de los CTCAE del NCI. Cualquier cambio clínicamente relevante que ocurra a lo largo del estudio debe registrarse en la sección de EAs del eCRD. Cualquier anomalía clínicamente significativa que persista al final del estudio/retirada temprana de este, deberá ser seguida por el investigador hasta su resolución o hasta que se alcance un “punto final” clínicamente estable. El estudio incluirá las siguientes evaluaciones de seguridad y tolerancia en los puntos temporales especificados en el cronograma de tiempo y eventos: una EF, una determinación del valor de la escala ECOG y un ECG de 12 derivaciones (solo el día 1 de cada ciclo y en la Visita Final del Estudio, a menos que la indicación clínica aconseje lo contrario). El investigador interpretará el ECG empleando una de las siguientes categorías: normal, anormal pero no clínicamente significativo, o anormal y clínicamente significativo.

A la vista de la experiencia previa con daratumumab en humanos, en estudios *in vitro* y en hallazgos toxicológicos en animales, se monitorizarán estrechamente las reacciones relacionadas con la infusión/reacciones alérgicas, la hemólisis y la trombocitopenia. Cualquiera de las monitorizaciones de seguridad puede llevarse a cabo con más frecuencia, y los EAs deben ser evaluados por el investigador con arreglo a la práctica estándar, cuando ello esté indicado clínicamente.

Un oftalmólogo llevará a cabo un estudio oftalmológico en la Visita de Reclutamiento, en las restantes visitas si está indicado clínicamente, y en la Visita Final del Estudio. El estudio oftalmológico completo incluye, antes de la dilatación: agudeza visual corregida, examen con lámpara de hendidura que incluya tonometría; después de la dilatación: fundoscopia y lámpara de hendidura para documentar la claridad del cristalino. Si se detecta una catarata durante la exploración, ésta se clasificará con arreglo al sistema de clasificación de opacidades del cristalino (Apéndice 4, SCOC III).

Prueba de VEF: los sujetos con EPOC o asma, documentados o en sospecha, deben someterse a una prueba de VEF durante el reclutamiento. Consultar la Sección 8.1.3.2 para obtener detalles acerca de los sujetos con alto riesgo de complicaciones respiratorias.

Se llevarán a cabo las siguientes pruebas de laboratorio:

- Hematología (muestra de sangre en ácido etilendiaminotetraacético [EDTA]); las pruebas incluyen hemoglobina, RGB, RGB con diferencial, linfocitos, monocitos, neutrófilos, neutrófilos

en banda, eosinófilos, basófilos y plaquetas, que se llevarán a cabo todos los Días 1 de todos los ciclos, y se realizará un hemograma adicional antes de cada dosificación de daratumumab distinta del Día 1 de cada nuevo ciclo

- Química sérica (muestra de sangre: suero)
  - Química sérica completa en: situación basal, Día 1 de cada ciclo y Visita del Final del Estudio. Incluirá: sodio, potasio, cloruro, bicarbonato, BUN, creatinina, glucosa, calcio, fosfato, magnesio, ALT, AST, fosfatasa alcalina, bilirrubina total, LDH, proteína total, albúmina.
  - Química sérica limitada, los días 8, 15 y 22 de los ciclos 1 y 2, y el día 15 de los ciclos del 3 al 6. Incluirá sodio, potasio, cloruro, bicarbonato, BUN, creatinina, glucosa, ALT, AST, fosfatasa alcalina, bilirrubina total y LDH, a menos que la situación clínica indique lo contrario.
  - Si la concentración de bilirrubina total se incrementa por encima de 1,5 veces con respecto al límite superior de la normalidad, esta deberá desglosarse en bilirrubina directa e indirecta.
  - TSH en situación basal, el Día 1 de cada ciclo, y en la Visita Final del Estudio
- Las pruebas de coagulación llevadas a cabo en la Visita de *Screening* o Selección y en la Visita Final del Estudio incluirán TP, TTPA e INR

#### **Interferencia de Daratumumab con los resultados del TAI**

Daratumumab interfiere con el TAI, que es una prueba que se realiza de manera rutinaria antes de una transfusión para identificar anticuerpos del paciente dirigidos a antígenos menores, de modo que se pueda seleccionar un donante de sangre que sea conveniente para dicha transfusión. Daratumumab no interfiere con el tipaje ABO/RhD. Los hematíes expresan CD38, aunque a niveles muy bajos; pero aun así daratumumab se une al CD38 en los hematíes, lo cual motiva un resultado positivo en el TAI (test de Coombs indirecto). Este resultado positivo enmascara la detección de anticuerpos frente a antígenos menores, y puede impedir o retrasar que los bancos de sangre identifiquen sangre de donante compatible para transfusión. Esta interferencia ocurre durante el tratamiento con daratumumab y puede prolongarse hasta seis meses después de haber terminado este. Los pacientes recibirán una tarjeta de identificación individual para el estudio, que incluirá su perfil sanguíneo (ABO, Rh y TAI) determinado antes de la primera administración de daratumumab, junto con información acerca de la interferencia en el TAI para bancos de sangre y profesionales de la salud. Los sujetos deberán llevar consigo dicha tarjeta a lo largo de todo el periodo de tratamiento y durante, al menos, seis meses después de la finalización del mismo. Los bancos de sangre pueden eliminar la interferencia de daratumumab sobre el TAI tratando los hematíes reactivos con

ditiotreitol (DTT) (Chapuy *et al*, Transfusion 2015 [58]).

Los métodos posibles que los bancos de sangre pueden emplear para, de un modo seguro, proveer de hematíes para transfundir a pacientes que reciban daratumumab, incluyen:

- a) Proveer de unidades ABO/RhD-compatibles, fenotípica o genotípicamente homólogas.
- b) Proveer de unidades ABO/RhD-compatibles, antígeno K-negativas tras descartar o identificar aloanticuerpos después de tratar los hematíes reactivos con DTT.

Deberán administrarse unidades de hematíes ABO/RhD-compatibles, aunque no se hayan llevado a cabo pruebas cruzadas completas, cuando el requerimiento transfusional sea urgente, según las pautas de trabajo del banco de sangre local.

A pesar de la unión de daratumumab a CD38 en los hematíes, no se han documentado hemólisis clínicamente significativas en los estudios con daratumumab. Para detalles adicionales, consultar la ficha técnica de daratumumab.

## **15.7 Estudios complementarios y exploratorios**

Se emplearán, para estudios adicionales de eficacia, muestras de aspirado de médula ósea obtenidas antes del reclutamiento o en el reclutamiento, y cuando los pacientes alcancen RC. PETHEMA facilitará a todos los centros participantes envases para enviar correctamente muestras biológicas; y todas las muestras se identificarán empleando las etiquetas suministradas por PETHEMA. En el Apéndice 7 se incluyen detalles acerca de la manipulación de las muestras.

La determinación vía FISH se llevará cabo, de ser posible, en la muestra recogida al reclutamiento, bien si las anormalidades citogenéticas detectadas fueran de nueva adquisición, o bien estuvieran ya presentes en el momento del diagnóstico. Se llevará a cabo un análisis molecular de las rutas de señalización asociadas al cáncer. Al final del protocolo se pueden encontrar detalles acerca de la recogida y procesamiento de muestras.

### **15.7.1 Estudios Biológicos propuestos**

Se llevarán a cabo estudios biológicos en:

- **En el momento de la inclusión (MO y SP)**
- **Tras el ciclo 4 de tratamiento.**
- **Cuando se alcance respuesta completa (MO y SP)**
- **Cada 6 meses en casos en RC con EMR+**
- **Anualmente en casos en RC con EMR-**

➤ **En el momento de la progresión (MO y SP)**

Para más información en relación con el proceso de envío de muestras, ver apéndice 7.

En cada uno de esos momentos se enviará al laboratorio central correspondiente un tubo de 5ml en heparina sódica o litio para citogenética y tres tubos de 5mL de médula ósea en EDTA (uno para citometría, otro para estudios moleculares y otro para separación y criopreservación de células plasmáticas), y 2 tubos de 10mL de sangre periférica en EDTA. En caso de duda, si es factible, siempre será mejor procesar la muestra por exceso que por defecto.

Siempre que se identifique la presencia de células plasmáticas patológicas en la muestra analizada, éstas se separarán mediante FACS junto con una población celular de control y se conservarán en el biobanco.

Se identificará la presencia de CPP mediante CMF de nueva generación y NGS, tanto en MO como en SP.

El perfil citogenético estándar de las células tumorales se determinará por FISH. Las células tumorales restantes, así como las células efectoras inmunes seleccionadas, se conservarán en el biobanco para secuenciación de ARN (RNA-seq). El objetivo de llevar a cabo estudios longitudinales de RNA-seq en células tumorales, es doble: 1) básicamente, para comparar los transcriptomas entre la quimio-refractoriedad primaria (no respuesta) vs. quimiorresistencia (menos que RC) vs. pacientes quimiosensibles (RC); 2), para entender la huella molecular de las células tumorales quimiorresistentes vs. basales. Además, el estudio de RNAseq permitirá evaluar la expresión de XPO1 y revisar su relación con la eficacia del protocolo, que incluye un fármaco íntimamente relacionado con esta proteína. El mismo análisis realizado en las células efectoras inmunes servirá para entender cómo el esquema propuesto modula a tales células.

## **15.8 Objetivos de eficacia adicionales**

Se determinarán TRG, DR, SLP, TTP, tasa de beneficio clínico (TBC), tasa de control de la enfermedad (TCE) y SG, en los pacientes con MM tratados con SDVd.

## **15.9 Procedimientos de eficacia**

### **15.9.1 Determinación de enfermedad objetiva**

Se seguirá a los pacientes hasta la PE o hasta la muerte.

Se realizarán los siguientes procedimientos para la valoración de la enfermedad:

- EFPS (Reclutamiento y Día 1 de cada ciclo).
- EFPO (Reclutamiento y Día 1 de cada ciclo)

- Inmunofijación en suero (Reclutamiento, confirmación de RC)
- CLLs séricas (Reclutamiento y Día 1 de cada ciclo)
- Examen esquelético, TC o TC de baja dosis o PET-TC (Reclutamiento, y más adelante solo si está clínicamente indicado)
- $\beta_2$ -microglobulina: Reclutamiento
- Niveles cuantitativos de inmunoglobulinas (Reclutamiento y fin del tratamiento)
- Se recogerán aspirados y/o biopsias de médula ósea dentro de las dos semanas previas a la primera dosis (situación basal) para determinar la infiltración de la médula ósea, la clasificación del MM y las anormalidades citogenéticas. Se realizará, además tras 4 ciclos de tratamiento. El aspirado de médula ósea se repetirá siempre que esté clínicamente indicado para confirmar la RC.

### 15.9.2 Objetivos de eficacia

La TRG constituye la variable principal de eficacia en este estudio, con la información adicional que se obtendrá de la DR.

Las variables secundarias de eficacia incluirán las siguientes, determinadas con arreglo a las definiciones que se han presentado en los objetivos secundarios:

- DR
- TBC, con información adicional acerca de la duración de TBC
- TCE, con información adicional acerca de la duración de TCE
- SLP
- SG
- TTP

### 15.9.3 Criterios de respuesta

La respuesta de la enfermedad se determinará con arreglo a los Criterios de Respuesta para MM del IMWG (Kumar *et al*, Lancet Oncol 2016 [59]) en todos los pacientes en cada ciclo hasta PE, toxicidad o muerte. No existe un tiempo máximo de duración del tratamiento.

Las definiciones de los Criterios de Respuesta individual se encuentran en el Apéndice 3.

### 15.9.4 Documentación de plasmocitomas extramedulares

Las localizaciones de plasmocitomas extramedulares conocidos deben documentarse durante la Fase de Reclutamiento. Puede usarse el examen clínico o el estudio de RMN para localizar sitios extramedulares de enfermedad. Las evaluaciones mediante TC constituyen una alternativa aceptable, siempre y cuando no exista contraindicación con respecto al empleo de contraste intravenoso. Ni PET ni pruebas de ultrasonidos son aceptables para documentar el tamaño de los

plasmocitomas extramedulares. PET-TC se considerará válido cuando la medida de los plasmocitomas extramedulares se lleve a cabo en la parte correspondiente a la TC.

Los plasmocitomas extramedulares deben determinarse en todos los sujetos con historia de plasmocitomas o si está clínicamente indicado en el momento del reclutamiento. La determinación se realizará mediante examen clínico o imagen radiológica.

La determinación de localizaciones medibles de enfermedad extramedular se llevará a cabo y se evaluará localmente cada cuatro semanas (por EF) en los sujetos con una historia de plasmocitomas, o cuando esté clínicamente indicado a lo largo del tratamiento en el resto de pacientes hasta el establecimiento de RC confirmada o PE confirmada. Si la evaluación solo puede realizarse radiológicamente se llevará a cabo cada doce semanas. Para cada paciente concreto, el método empleado para la evaluación de cada localización de enfermedad debe ser similar en todas sus visitas. Las lesiones irradiadas o extirpadas no se considerarán medibles, y solo se monitorizarán cara a la PE.

Para alcanzar el grado de RP o RM, la suma de los diámetros perpendiculares máximos de los plasmocitomas extramedulares existentes debe haber disminuido al menos un 50% y no tienen que haber aparecido nuevos plasmocitomas (ver los criterios de respuesta de la enfermedad en Apéndice 3). Para considerar que existe PE, o bien la suma de los diámetros perpendiculares máximos ha aumentado al menos un 50% respecto al nadir en >1 lesión extramedular, o bien debe haber aparecido un nuevo plasmocitoma. Se considerará asimismo que existe PE en los casos en los que se detecte un crecimiento de al menos un 50% o superior en el diámetro mayor de una lesión previamente conocida que tuviera al menos 1 cm de longitud en su eje corto.

## **16 CRITERIOS DE RETIRADA**

### **16.1 Retirada temprana del estudio**

El estudio puede suspenderse a criterio único del promotor por cualquier motivo, incluyendo argumentos médicos o éticos que influyan en la continuación de su realización, o dificultades con el reclutamiento de los pacientes.

### **16.2 Retirada temprana de pacientes individuales**

El investigador puede, bajo su criterio, retirar el tratamiento en estudio a un paciente por cualquiera de los siguientes motivos:

- PE, definida esta con arreglo a los Criterios Uniformes de Respuesta de progresión del MM del IMWG

- EA/EAs inaceptables, o fracaso en la tolerancia del tratamiento en estudio
- El paciente decide voluntariamente suspender la terapia en estudio
- En opinión del investigador, cualquier razón que médicamente justifique la retirada o violación relevante del protocolo

Los pacientes pueden suspender el tratamiento en estudio por cualquier motivo. Se debe animar a continuar en el estudio a los pacientes que elijan dicha opción, de tal modo que se pueda obtener información de seguimiento relativa a la PE y al estatus de supervivencia. Sin embargo, los pacientes pueden optar por retirar el consentimiento y declinar cualquier participación posterior en el estudio.

Se seguirá a todos los pacientes hasta la PE, retirada del consentimiento, y aparición de cualquier criterio de retirada: toxicidad intolerable que impida continuar con el tratamiento con el fármaco en estudio, muerte o pérdida del seguimiento.

## 17 PRODUCTO EN INVESTIGACIÓN Y FINANCIACIÓN DEL ESTUDIO

Un producto en investigación, también conocido como producto médico en investigación en algunas regiones, se define como una forma farmacéutica de una sustancia activa o placebo que está siendo investigada o usada como referencia en un estudio clínico, incluyendo productos que, aunque cuenten ya con una autorización comercial, estén siendo usados o presentados (formulados o envasados) de un modo diferente al autorizado, o usados para una indicación no autorizada, o usados con objeto de conseguir nueva información acerca de la forma autorizada.

**Daratumumab** está disponible en el mercado y posee, en el momento presente, las siguientes indicaciones terapéuticas:

- en monoterapia, tratamiento de pacientes adultos con MM R/R cuya terapia previa haya incluido un IP y un IMiD, y que hayan experimentado PE en la última terapia.
- en combinación con lenalidomida y dexametasona, o bortezomib y dexametasona, para el tratamiento de pacientes adultos con MM que hayan recibido al menos una terapia previa.
- en combinación con bortezomib, melfalán y prednisona para el tratamiento de pacientes adultos con mieloma múltiple de nuevo diagnóstico que no son candidatos a un trasplante autólogo de progenitores hematopoyéticos.

**Bortezomib** está disponible en el mercado y posee, en el momento presente, las siguientes indicaciones terapéuticas:

- Bortezomib en monoterapia o en combinación con doxorubicina liposomal pegilada o dexametasona, está indicado para el tratamiento de pacientes adultos con MM progresivo que hayan recibido al menos una terapia previa, y que ya hayan sido objeto de o no sean aptos para un trasplante de células madre hematopoyéticas.
- Bortezomib, en combinación con melfalán y prednisona, está indicado para el tratamiento de pacientes adultos con MM no tratado previamente y que no son aptos para quimioterapia de alta dosis con trasplante de células madre hematopoyéticas.
- Bortezomib, en combinación con dexametasona, o con dexametasona y talidomida, está indicado para el tratamiento de inducción de pacientes adultos con MM no tratado previamente y que sí son aptos para quimioterapia de alta dosis con trasplante de células madre hematopoyéticas.
- Bortezomib, en combinación con rituximab, ciclofosfamida, doxorubicina y prednisona, está indicado para el tratamiento de pacientes adultos con linfoma de células del manto no tratado previamente, que no son aptos para el trasplante de células madre hematopoyéticas.

Janssen suministrará los productos en investigación daratumumab y bortezomib. Por otro lado, Karyopharm suministrará selinexor, aprobado por la FDA en combinación con dexametasona. Los propios centros participantes obtendrán la dexametasona con arreglo a sus pautas estándar de prescripción.

Además, tanto Karyopharm como Janssen colaborarán económicamente en la financiación de los costes económicos asociados a este ensayo clínico.

## 18 EVENTOS ADVERSOS

Se define un EA como cualquier incidencia médica no deseable en un paciente que está recibiendo un producto farmacéutico, independientemente de la relación causal con este tratamiento. Un EA puede, por tanto, ser cualquier signo desfavorable o imprevisto (incluido un hallazgo de laboratorio anormal), síntoma o patología asociados temporalmente con el uso del fármaco en estudio, estén o no relacionados con dicho medicamento.

Cualquier resultado anormal de laboratorio acaecido en el contexto del tratamiento que sea clínicamente relevante, es decir, que satisfaga una o más de las siguientes condiciones, debe registrarse como un diagnóstico individual en la página de EAs del eCRD:

1. Acompañado por síntomas clínicos

2. Que conduzca a un cambio en la medicación en estudio (p.ej., modificación de dosis, interrupción o suspensión permanente)
3. Que requiera un cambio en la terapia concomitante (p.ej., adición de, interrupción de, suspensión de, o cualquier otro cambio en la medicación concomitante, terapia o tratamiento)

El registro de todos los EAs que ocurran durante el estudio es responsabilidad del investigador. La información acerca del EA no se obtendrá preguntando directamente por ese evento concreto, sino que el investigador dirigirá al paciente una pregunta más general, por ejemplo: “¿Ha experimentado usted algún nuevo síntoma, o cambio en los síntomas, desde la última vez que le preguntamos al respecto/desde la última visita?” Los EAs deben consignarse en la página a tal efecto del eCRD.

Los EAs deben registrarse indicando su grado exacto y su duración.

Se emplea el término “severo”, entendido como intenso, para describir la intensidad de un EA; el evento podría, per se, ser de una relevancia clínica menor (p.ej., dolor de cabeza “severo”). Su significado no es similar a “grave”. La gravedad de los EAs se basa en las consecuencias de éstos, y se asocia habitualmente con eventos que constituyan una amenaza para la vida del paciente o para su estatus funcional.

La severidad o intensidad del EA se graduará con arreglo a la Escala de Graduación CTCAE (para detalles, ver la página web CTCAE en <http://ctep.cancer.gov>). En cuanto a los EAs no contemplados por CTCAE, la severidad se caracterizará como “leve”, “moderada” o “severa”, según las siguientes definiciones:

- Los eventos leves son habitualmente pasajeros y no interfieren con las actividades diarias del paciente.
- Los eventos moderados introducen en el paciente un nivel bajo de inconveniencia o preocupación, y pueden interferir con las actividades diarias.
- Los eventos severos o intensos interrumpen las actividades diarias habituales del paciente.

El investigador juzgará la posible asociación entre el EA y el fármaco en estudio, tal y como se indica en la Tabla 10.

Tabla 10 Clasificación de los Eventos Adversos con arreglo a la Causalidad

|                 |                                                                                                                                                                                                                                                                                      |
|-----------------|--------------------------------------------------------------------------------------------------------------------------------------------------------------------------------------------------------------------------------------------------------------------------------------|
| No relacionados | La falta de una asociación temporal del evento con el tratamiento en estudio motiva que no pueda argumentarse una relación causal; o que exista cualquier otra medicación, intervención terapéutica o condición médica subyacente que pueda per se justificar el evento              |
| Relacionados    | La asociación temporal del evento con el tratamiento en estudio justifica definitivamente la asociación, y el evento se explica con más probabilidad por la exposición a dicho tratamiento que por cualquier otra medicación, intervención terapéutica o condición médica subyacente |

### 18.1 Eventos adversos graves

Un EAG es cualquier incidencia médica adversa que sucede en cualquier momento a lo largo del periodo de tratamiento de estudio (incluyendo también el periodo entre la firma del DCI y el Día 1 de Ciclo1), que:

- Conduce a la muerte del paciente
- Constituye una amenaza para la vida (el paciente se encuentra en peligro de muerte inminente desde la instauración del evento)
- Requiere hospitalización (admisión formal en el hospital por motivos médicos) o prolongación de la hospitalización existente
- Desencadena una invalidez/discapacidad persistente o relevante
- Motiva una anomalía congénita/defecto de nacimiento
- Una segunda neoplasia maligna primaria diagnosticada durante el estudio (histopatológicamente distinta de la patología en estudio)
- La transmisión de un agente infeccioso a través de la medicación

Los eventos médicos importantes que probablemente ni causen la muerte, ni amenacen la vida, ni produzcan invalidez, ni requieran hospitalización, pueden considerarse EAG cuando de acuerdo al criterio médico, puedan poner en peligro al paciente y/o puedan requerir intervención médica o quirúrgica para prevenir uno de los desenlaces que se han enumerado previamente en esta definición. Cualquier sospecha de transmisión de un agente infeccioso a través de producto médico también se puede considerar EAG. Son ejemplos de tales eventos el broncoespasmo alérgico que requiere tratamiento intensivo en Urgencias o a domicilio, discrasias sanguíneas o convulsiones que no requieran hospitalización, o la dependencia o abuso de fármacos.

No se considerarán EAG:

- Las hospitalizaciones motivadas por cirugías programadas o electivas .
- Un procedimiento habitual para la administración del tratamiento del protocolo o para el manejo de la enfermedad, así como las transfusiones habituales de la indicación en estudio (no así las complicaciones de dichas transfusiones o procedimientos que requieran hospitalización o prolonguen la misma)
- El tratamiento o seguimiento habitual de la indicación en estudio.
- La prolongación de la hospitalización por motivos técnicos, sociales o prácticos en ausencia de EA.
- La observación o tratamiento ambulatorio de urgencia que no motive ingreso, salvo que cumpla alguno de los criterios de gravedad descritos.

Si la progresión de la neoplasia (incluyendo los desenlaces fatales) está calificada con arreglo a los criterios del IMWG de progresión del MM (ver Apéndice 3), como tiene que ver exclusivamente con el curso clínico de la enfermedad, no debe consignarse como EAG, pero debe registrarse en el CRD como un EA. Las muertes súbitas y no explicables deben registrarse como EAG.

Si existe cualquier incertidumbre acerca de que un hallazgo se haya debido únicamente a la progresión de la patología neoplásica (p.ej., falta de eficacia descrita por el médico), dicho hallazgo debe consignarse como un EA o un EAG, la opción mas apropiada de las dos de acuerdo a los criterios previos.

Los EAs distintos de la progresión de la neoplasia (p.ej., trombosis venosa profunda en el periodo de progresión, o hemoptisis concurrente con el hallazgo de la PE) serán documentados siguiendo las pautas habituales empleadas para tales eventos, con la apropiada atribución en lo referente a su relación con el fármaco.

#### **18.1.1 Seguimiento de EA y EAG**

Todos los EAs que sucedan durante el estudio se registrarán en el CRD y serán seguidos, de acuerdo con la buena práctica clínica (BPC), hasta su resolución, estabilización o hasta considerar que dejan de ser clínicamente relevantes; o si se trata de una condición crónica, hasta caracterizarlos en su totalidad. Cualquier EA que se considere relacionado con el fármaco (posiblemente relacionado, relacionado) deberá seguirse hasta su resolución o estabilización. Cualquier EA que incluya erupciones deberá documentarse con fotografías hasta su resolución.

#### **18.1.2 EA y EAG post-estudio**

Todos los EAs no resueltos deben ser seguidos por el investigador hasta su resolución, hasta que se pierda el seguimiento del paciente o hasta que el EA se explique de otra manera. En la última visita programada, el investigador debe instruir al paciente de modo que este dé cuenta de cualquier evento posterior acerca del cual el paciente, o el médico personal del paciente, crea que existen motivos razonables para pensar que tiene relación con su participación en este estudio. Antes de la conclusión del estudio en su centro participante, el investigador debe comunicar al Comité de Seguridad cualquier muerte o EA que haya ocurrido en cualquier momento posterior a que un paciente haya suspendido o concluido su participación en este estudio, siempre que existan indicios razonables que puedan vincularlos con él.

El personal del estudio realizará, a todo paciente que se retire del estudio (o a la familia de éste), una llamada telefónica cada 30 días como parte del Seguimiento de Supervivencia (ver Tabla 1), para indagar acerca del estatus de su MM, y de su bienestar. Tras la conclusión del estudio el investigador debe comunicar a la persona designada por el promotor cualquier muerte o EAG de los que tenga conocimiento que hayan ocurrido en cualquier momento posterior a la retirada del paciente o a la terminación de su participación, y de los que existan indicios razonables que sugieran su asociación con el estudio. Asimismo, si llega a conocimiento del investigador que un descendiente de un paciente que haya participado en este estudio, y que haya sido concebido posteriormente a la realización de éste, ha desarrollado una neoplasia o una anomalía congénita, el investigador deberá comunicar este hecho a la persona designada por el promotor.

## **18.2 Abuso, mal uso, errores en la medicación, y exposición involuntaria/accidental, exposición ocupacional**

Todas las incidencias relativas al abuso, mal uso, errores en la medicación (con o sin exposición por parte del paciente a la medicación del estudio, por ejemplo, una confusión en el nombre del producto) y exposición ocupacional, deben ser comunicadas a la persona designada por el promotor en un informe de EAG, mediante el envío de un e-mail, independientemente de si existe o no un EA o un EAG asociado.

### **18.2.1 Sobredosificación**

Se define una sobredosis como la administración, deliberada o accidental, de la medicación de investigación a un paciente participante en el estudio, a una dosis por encima de la asignada a ese paciente concreto con arreglo al protocolo del estudio. En el caso de que exista sobredosificación de un fármaco, el hecho debe ponerse de inmediato en conocimiento del investigador, y el paciente debe ser estrechamente vigilado en relación con posibles EAs. El paciente debe ser tratado sintomáticamente, y debe consignarse en el expediente médico del paciente la incidencia de la

sobredosis y los EAs relacionados con la misma. Los síntomas derivados de la sobredosificación se tratarán convenientemente y además debe comunicarse esta incidencia a la persona designada por el promotor en un formulario de informe de EAG, independientemente de si el EA o el EAG ha ocurrido debido a la sobredosificación. En el caso de que esta sí esté asociada con un EAG, el formulario de informe de EAG se debe enviar a la persona designada por el promotor dentro de las 24 horas inmediatamente posteriores al conocimiento del hecho. Si no existe EAG o EAs, debe enviarse el informe lo antes posible, en cualquier caso.

Como selinexor se metaboliza a través de su conjugación con GSH, es concebible que una sobredosificación pueda motivar una depleción hepática de GSH. Por lo tanto, en los pacientes que presenten anomalías en las pruebas de función hepática deberían considerarse medidas de soporte tales como suplementación con SAM (400 mg por v.o. de una a cuatro veces al día) u otros fármacos que puedan reemplazar al GSH.

#### **18.2.2 Abuso, mal uso o error en la medicación**

Se define abuso como el uso excesivo, intencionadamente, del fármaco en estudio, de manera persistente o esporádica, que viene acompañado de efectos físicos o psicológicos perjudiciales.

Un error en la medicación es cualquier incidencia evitable que pueda causar o conducir a un uso inapropiado de la medicación o perjuicio para el paciente, mientras la medicación se encuentra bajo el control de los profesionales sanitarios o de los pacientes (incluye errores de medicación potenciales, interceptados o reales). Tal incidencia puede ser debida a la práctica del personal sanitario, al etiquetado del producto, a su envasado y preparación, a los métodos de administración o a errores que pueden incluir prescripción, comunicación del pedido, nomenclatura, composición, dispensación, distribución, administración, educación, monitorización y uso.

Todas las incidencias de abuso, mal uso o error en la medicación con los fármacos en estudio de Janssen y/o Karyopharm, deben notificarse a la persona designada por el promotor en un formulario de informe de EAG, independientemente de la determinación de causalidad o no manifestada por el investigador. Si el abuso, mal uso o error en la medicación se asocian con un EAG, el formulario de informe de EAG se debe enviar a la persona designada por el promotor dentro de las 24 horas inmediatamente posteriores al conocimiento del hecho. Si no existen EAs o EAG, igualmente el informe debe enviarse lo antes posible.

#### **18.2.3 Exposición involuntaria/ accidental, exposición ocupacional**

La exposición ocupacional es la exposición a un fármaco en estudio durante el ejercicio de la actividad profesional, extensible también a sujetos que no son profesionales de la salud pero que quedan expuestos a dicho fármaco.

Todas las incidencias de exposición ocupacional a un fármaco en estudio de Janssen y/o Karyopharm deben notificarse a la persona designada por el promotor en un formulario de informe de EAG, independientemente de si ha sucedido o no un EA o un EAG durante la exposición ocupacional. Si la exposición ocupacional se asocia con un EAG, el formulario de informe de EAG se debe enviar a la persona designada por el promotor dentro de las 24 horas inmediatamente posteriores al conocimiento del hecho. Si no existen EAs o EAG, el informe debe enviarse lo antes posible.

### **18.3 Reclamaciones acerca de la calidad del producto**

Una reclamación acerca de la calidad del producto (RCP) es cualquier reclamación que sugiera que existe un posible problema con la calidad del fármaco durante su manufactura, envasado, pruebas de liberación, monitorización de la estabilidad, preparación de la dosis, almacenamiento, distribución o sistema de entrega (también conocida como reclamación técnica).

Nota: El mal funcionamiento de un dispositivo o aparato también se considera una RCP. Los informes precisos al respecto y a su debido tiempo, y la evaluación de la RCP, son cruciales para la protección de los pacientes, investigador y promotor. Todas las RCP iniciales se deben notificar dentro de las 24 horas inmediatamente posteriores al conocimiento del hecho. Si se combina una RCP con un EAG, el informe a realizar debe cumplir las pautas acerca de cómo informar los EAG. Debe conservarse una muestra del producto bajo sospecha por si a posteriori se requirieran investigaciones.

### **18.4 Embarazo y lactancia**

Nota: Los embarazos no se consideran EAs per se; sin embargo, se discuten en esta sección debido a la importancia que tiene informar sobre los embarazos que suceden durante los estudios, y porque una incidencia médica observada en la madre o feto/recién nacido se clasificaría como un EA.

Se debe comunicar cada situación de embarazo y/o lactancia materna en una paciente sujeta al tratamiento en estudio o en la pareja de un paciente bajo dicho tratamiento a la persona designada por el promotor dentro de las primeras 24 horas en las que el investigador conoce la noticia, empleando el formulario de informe de embarazos aprobado. Los embarazos deben seguirse para determinar el resultado, y esto debe hacerse independientemente de si la/el paciente se retira del

estudio o de si este ha concluido. El seguimiento debe prolongarse hasta tres meses después de que el/la paciente reciba la última dosis del tratamiento de estudio para determinar el desenlace, incluyendo terminación espontánea o voluntaria, detalles del nacimiento, y presencia/ausencia de cualquier defecto de nacimiento, anormalidades congénitas o complicaciones en la madre y/o el recién nacido.

Cualquier desenlace negativo o episodio perjudicial en el curso del embarazo o durante el parto en una paciente que se encuentre recibiendo el tratamiento en estudio, deberá ser informado dentro de las primeras 24 horas inmediatamente posteriores a que el investigador conozca el hecho.

Se sugiere a los pacientes masculinos que eviten la paternidad hasta tres meses después de concluida la terapia con selinexor. No existe ahora mismo información disponible acerca de los efectos de selinexor sobre la fertilidad, gestación o desarrollo posterior del bebé.

Debe informarse al investigador y a la persona designada por el promotor acerca de cualquier embarazo que se produzca dentro de los primeros tres meses post-estudio, y se debe informar al paciente acerca de los posibles riesgos para el feto.

Cualquier EAG que suceda durante el embarazo y/o lactancia materna debe consignarse en el formulario de informe de EAG (p.ej. complicaciones maternas serias, aborto terapéutico, embarazo ectópico, muerte fetal, muerte neonatal, anomalía congénita, defecto de nacimiento), y enviarse a la persona designada por el promotor dentro de las primeras 24 horas con arreglo al procedimiento de comunicación de los EAG.

## **18.5 Comunicación de EAG**

### **18.5.1 Requisitos de los informes**

Las sospechas de reacciones adversas graves inesperadas deben ser notificadas con prontitud a las autoridades reguladoras.

Los centros participantes (su personal autorizado) deben informar a la persona designada por el promotor acerca de todos los EAG, RCP, embarazos o eventos adversos de especial interés (EAEI) dentro de las primeras 24 horas inmediatamente posteriores a que el personal del estudio tenga conocimiento del hecho por primera vez.

Es importante que el investigador incluya su juicio acerca de la relación con el fármaco de estudio en el momento del informe inicial. La notificación puntual de un evento no implica la necesidad de poseer toda la información al respecto en el momento del informe inicial.

Además, la persona designada por el promotor debe informar al promotor y a los departamentos de farmacovigilancia de Janssen y Karyopharm acerca de todos los EAG, RCP, embarazos o EAEI que ha experimentado un participante en el estudio, y debe hacerlo dentro de las primeras 24 horas inmediatamente posteriores a que haya tenido conocimiento del hecho por primera vez, independientemente de que este tenga o no relación con el fármaco en estudio.

En un formulario de informe de EAG debe consignarse la siguiente información:

- Número del protocolo
- Número del centro y/o investigador
- Número del paciente
- Datos demográficos
- Breve descripción del evento
- Criterio de gravedad
- Fecha y hora de la aparición
- Fecha y hora de la resolución, si ésta sucede
- Estatus actual, si el evento todavía no se hubiera resuelto
- Cualquier tratamiento y medicación concomitante
- Juicio del investigador acerca de la relación con el producto en investigación
- Desenlace del evento, si se dispone del dato

La persona designada por el promotor se pondrá en contacto con el centro participante para la aclaración de los datos consignados en el informe o para obtener la información que falte. En el caso de cuestiones relacionadas con cómo comunicar los EAG, el centro participante puede contactar con el promotor o la persona designada por él para resolver estas cuestiones.

El informe de EAG se distribuirá a la lista de distribución de seguridad de PETHEMA.

PETHEMA o la/s persona/s que designe, se responsabiliza del envío a las autoridades y a otras agencias reguladoras con arreglo a las pautas específicas de cada país, de informes sobre EAs asociados con el uso del fármaco que sean tanto serios como inesperados. Todos los investigadores participantes en estudios clínicos en curso con la medicación en estudio recibirán copias de dichos informes para su rápida remisión a su Comité de Revisión Institucional (CRI) o Comité de Ética Independiente (CEI).

La comunicación de EAG al CRI o al CEI se llevará cabo con arreglo a los procedimientos operativos y políticas estándar de los CRI/CEI. Se debe conservar documentación que acredite que los CRI/CEI han sido debidamente informados.

#### **18.5.2 EA de especial interés (EAEI)**

Los EAEIs relacionados con selinexor incluyen cataratas y síndrome cerebeloso agudo. Se deben comunicar todos los casos de toxicidad cerebelosa de grado  $\geq 3$ .

Los EAEIs relacionados con bortezomib incluyen: leucoencefalopatía multifocal progresiva y condiciones similares, errores en la medicación, neoplasias secundarias, problemas visuales y aparición súbita de retención de fluidos/edema generalizado. Se debe emitir informe acerca de todos los casos.

Los EAEIs relacionados con daratumumab incluyen: segundas neoplasias primarias, interferencia con el tipaje sanguíneo (antígenos menores), y reacciones a la inyección. Se debe emitir informe sobre los casos. Registros de informes de Eventos Adversos (EA)

PETHEMA, o la/s persona/s que designe, comunicará todos los EAs (incluyendo todos los EAs no graves) a los departamentos de farmacovigilancia de Janssen y Karyopharm cada seis meses y al final del estudio, en forma de listados. Los listados contendrán la siguiente información (lista parcial): número del sujeto, EA, severidad, desenlace, y el juicio del investigador acerca de la causalidad. Karyopharm Therapeutics, Inc. proporcionará una plantilla con las variables requeridas.

## **19 MÉTODOS ESTADÍSTICOS**

### **19.1 Planes estadísticos y analíticos**

Este es un estudio multicéntrico, sin enmascaramiento, de un único brazo, de fase 2, de selinexor administrado por vía oral en combinación con dexametasona más el AcMo anti-CD38 daratumumab más bortezomib, en pacientes con MM refractario o R/R. Debe existir evidencia documentada acerca de la refractariedad, o recaída y refractariedad, de la enfermedad antes de la entrada en el estudio.

Se realizarán las tabulaciones pertinentes para la disposición apropiada de los datos demográficos, variables en situación basal, y parámetros de seguridad y de eficacia. Para las variables categóricas se presentarán tabulaciones que compendien el número y porcentaje de pacientes, dentro de cada categoría (con una categoría de datos perdidos), del parámetro correspondiente, así como intervalos de confianza (IC) al 95% bilateral, a menos que se especifique lo contrario. Para variables continuas se presentarán el número de pacientes, media, mediana, desviación estándar y valores

mínimo y máximo. Los datos acerca del tiempo hasta un acontecimiento se sintetizarán mediante la metodología de Kaplan-Meier empleando los percentiles 25, 50 (mediana) y 75, e IC al 95% bilateral asociados, así como el porcentaje de observaciones censuradas.

## **19.2 Determinación del tamaño muestral**

Los datos más recientes comunicados sobre la eficacia del uso de selinexor en combinación con bortezomib y dexametasona en pacientes con MM en recaída y/o refractarios tras haber recibido entre 1 y 3 líneas de tratamiento previas mostraron una tasa de Respuestas Completas del 13% en el grupo de pacientes que fueron incluidos en la fase de expansión. Nuestra hipótesis es que el añadir daratumumab a la combinación SvD podría aumentar la tasa de RCs hasta el 35%, basado en que la población a incluir en el presente ensayo será diferente a la del CASTOR, puesto que la mayoría de pacientes habrán sido expuestos a lenalidomida y, además, habrá pacientes refractarios.

Con 52 pacientes obtendremos una potencia estadística de aproximadamente el 90% para rechazar la hipótesis nula, con un error alfa predefinido de 0,05 (unilateral). La tasa de respuesta se determinará mediante un análisis por Intención-de-Tratar.

Considerando un porcentaje de retiradas del 10%, se incluirá en el ensayo a 5 pacientes más, por lo que el tamaño muestral final sería de 57 pacientes.

## **19.3 Disposición de los pacientes**

Se presentará una tabulación de la disposición de los pacientes, que incluirá el número de ellos en cada población de análisis, el número de ellos con enfermedad no evaluable con arreglo a los criterios IMWG, el número censurado en cada uno de los análisis de SLP y SG, el número de los perdidos para su seguimiento, el de los retirados antes de completar el estudio, y la razón (razones) de la retirada.

## **19.4 Análisis de los conjuntos de datos**

### **19.4.1 Población a analizar**

#### **19.4.1.1 Población por intención de tratar**

La población por intención de tratar constará de todos los pacientes que hayan sido incluidos en el ensayo y hayan recibido al menos una dosis del tratamiento en estudio. Esta población incluirá a los pacientes que hayan suspendido la terapia debido a toxicidad o PE, y a los pacientes que hayan muerto por cualquier causa, incluyendo las relacionadas con el fármaco en estudio o con la enfermedad. Esta población se utilizará para los análisis principales de la eficacia.

#### **19.4.1.2 Población por protocolo**

La población por protocolo constará de todos los pacientes a los que se haya administrado el fármaco en estudio durante al menos cuatro semanas de tratamiento, que hayan accedido a someterse a las evaluaciones previstas en el estudio, y hayan recibido al menos el 80% de la medicación en estudio prescrita; y que no hayan realizado violaciones importantes del protocolo que pudieran comprometer la determinación de la eficacia. Se determinarán las violaciones mayores independientemente del conocimiento de la respuesta a la terapia, antes del cierre de la base de datos y de los análisis previstos en el estudio. Se utilizará esta población para inferencias complementarias en el ámbito de la eficacia. Sin embargo, si existen diferencias mayores entre los resultados en esta población y los obtenidos en la población por intención de tratar, se tendrá en cuenta en la determinación de la eficacia.

#### **19.4.1.3 Población de seguridad**

La Población de Seguridad constará de todos los pacientes que hayan recibido cualquier catidad de la medicación en estudio.

### **19.5 Análisis de datos y presentación**

Se presentarán tabulaciones que sinteticen globalmente los datos demográficos, basales, de eficacia y de seguridad, tal como se indica en las siguientes secciones. Todos los datos recogidos en el eCRD se presentarán en listados de datos por-paciente.

#### **19.5.1 Características demográficas**

El compendio de las características demográficas incluirá género y edad en el momento del consentimiento. En cuanto a éstas, se presentarán resultados de mediana, mínimo, máximo y desviación estándar.

#### **19.5.2 Características basales e historial médico**

Las características basales incluirán estatus funcional, tiempo transcurrido desde el diagnóstico inicial, respuesta a la terapia previa, tipos de terapias previas y si los pacientes son refractarios o R/R.

Los resultados basales del historial médico y la EF se presentarán recogidos en tablas.

#### **19.5.3 Objetivo principal**

El principal análisis estadístico de la eficacia se centrará en determinar las  $\geq$  Respuestas Completas (RC), incluyendo respuestas completas estricta (RCe) y respuestas completas (RC) para la población global del AIT y para la población global del APP.

#### **19.5.4 Objetivos secundarios**

Se evaluará la eficacia del tratamiento en términos de tasa de respuesta global (alcanzar RC o RP), con datos complementarios adicionales que proporcionarán la DR.

Se describirá la DR empleando el método de Kaplan-Meier estratificado, con los estratos definidos por la exposición previa a diferentes IPs e IMiDs, alteraciones citogenéticas, así como por estadio III según el *International Staging System* (ISS) vs. estadios I o II, e incluyendo una estimación de la mediana, así como los percentiles 25 y 75, junto con IC al 95% (bilateral).

Otros objetivos secundarios clave, que incluyen SLP y SG, se evaluarán estadísticamente empleando los intervalos de confianza apropiados. Las pruebas estadísticas se realizarán al nivel 0,025 unilateral. La DR se define como la duración del periodo comprendido entre el momento en el que por primera vez se alcanzaron criterios de respuesta de la enfermedad hasta la primera fecha de recurrencia, PE o muerte. La SLP se determinará mediante métodos basados en Kaplan-Meier, y la SG también mediante este tipo de aproximación.

La DR se calculará, en los pacientes que consigan una respuesta (TRG), como la duración del periodo entre la fecha en la que se observó la primera evidencia de respuesta objetiva de la enfermedad, según los criterios IMWG, y la fecha de la primera recurrencia, PE o muerte. El inicio de la TCE se establecerá en la fecha de la primera dosis del tratamiento. La DR para cada tipo concreto de respuesta se tratará como información descriptiva adjunta a los análisis de las tasas de respuesta. El análisis de la duración de cada tipo de respuesta se llevará a cabo según métodos de Kaplan-Meier con estratificación.

#### **19.5.5 Objetivos secundarios y exploratorios adicionales**

Los análisis de objetivos de eficacia complementarios se llevarán a cabo empleando estadística descriptiva, ya que de tales análisis se espera que aporten una información adicional a los resultados del objetivo principal de eficacia, o bien que faciliten el planteamiento de nuevas hipótesis, pero no se pretende que aporten evidencias fundamentales o confirmatorias en términos de eficacia.

La comparación del TTP en el presente estudio con el TTP en terapias previas del MM se llevará a cabo como un análisis secundario adicional, complementario al análisis principal de la SLP. Para los

análisis categóricos se clasificará a los pacientes según presenten un TTP que sea o más corto, o mayor o similar al de su terapia previa (donde “similar” se definirá como  $\pm 10\%$  con respecto al TTP previo). Para el análisis del tiempo hasta el acontecimiento, se determinará la diferencia entre el TTP del presente estudio y el TTP de la terapia anterior. Debe tenerse en cuenta que el TTP para el presente estudio puede integrar resultados censurados. Por tanto, para minimizar el impacto de dicha censura, este análisis podría requerir la “maduración” de los datos del TTP más allá del tiempo en el que han sucedido los eventos para el análisis principal de la SLP.

Se llevarán a cabo algunas comparaciones de interés entre subgrupos. Estos análisis entre subgrupos poseerán una naturaleza más descriptiva que confirmatoria, ya que no se ha dotado a este estudio del poder estadístico suficiente para determinar diferencias específicas entre los subgrupos en lo relativo a la eficacia de selinexor-dexametasona más daratumumab. Concretamente, se llevarán a cabo dos análisis entre subgrupos, basados en factores de estratificación. El primero se basará en la presencia de anomalías citogenéticas de alto riesgo; para cada uno de los dos grupos (estándar y alto riesgo) se presentará una sinopsis de los datos estadísticos. El segundo utilizará el estadio ISS, estadio ISS revisado, y estatus de la enfermedad en el momento del reclutamiento (refractoriedad o R/R).

En estos subgrupos de pacientes con diferentes características basales se llevarán a cabo análisis de la respuesta ( $\geq$  respuesta completa (RC) y DR), SLP y SG.

#### **19.5.6 Datos de seguridad**

Los análisis de seguridad se llevarán a cabo en la Población de Seguridad, que incluirá a todos los pacientes que hayan recibido al menos una dosis de la medicación en estudio.

##### **19.5.6.1 Eventos adversos**

Los EAs se codificarán con arreglo al Diccionario Médico para Actividades Regulatorias (MedDRA), y se mostrarán en tablas y listados empleando la Clasificación MedDRA por Órganos y Sistemas (SOC) y por Término Preferido (PT).

Los análisis de los EAs se llevarán a cabo para aquellos eventos que acontezcan durante el periodo de tratamiento (*treatment emergent*), definiendo éstos como cualquier EA con aparición, o empeoramiento de una condición preexistente, en algún momento entre después de la primera dosis del tratamiento hasta 30 días después de la última dosis de éste, o cualquier evento que el investigador considere relacionado con el fármaco hasta el final del estudio. Los EAs con fechas parciales serán analizados con arreglo a la información temporal disponible, para determinar si han acontecido durante el periodo de tratamiento; se asumirá que los EAs cuyas fechas se desconozcan

por completo han acontecido durante el periodo de tratamiento. No se determinarán tasas de incidencia de EAs que respondan a la puesta a prueba de hipótesis formales.

Los EAs se presentarán por tasas de incidencia entre los pacientes. Por tanto, en cada tabulación, un paciente solo contribuye una vez al recuento de un EA concreto. Se mostrarán el número y porcentaje de pacientes con cualquier EA emergente durante el tratamiento (EAET), clasificados por SOC y PT. Asimismo, se tabulará el número y porcentaje de pacientes con EAETs juzgados por el investigador como posiblemente relacionados con el tratamiento. Se tabulará del mismo modo el número y porcentaje de pacientes con cualquier EAET de grado  $\geq 3$ .

El investigador juzgará la posible asociación causal entre la aparición de un EA y el fármaco en estudio como no relacionada, posiblemente relacionada, o relacionada. En los casos en los que los pacientes experimenten reiteradamente episodios de un mismo EA, se tendrán en cuenta, a efectos de tabulación, los de mayor severidad y/o los de más fuerte asociación causal con el tratamiento.

También se tabularán los EAS. Todos los EAs (EAETs y EAs post-tratamiento) se presentarán en listados que incluirán datos clasificados por paciente y día del estudio. Además, se realizarán listados por paciente separados para lo siguiente: muertes, EAS y EAs que hayan conducido a la retirada.

También se presentará una breve sinopsis de los datos más importantes de los EAs, con desglose de los pacientes por subtipo de enfermedad.

#### **19.5.6.2 Datos de laboratorio**

Los valores de laboratorio se expresarán empleando unidades convencionales. Se mostrarán, para cada parámetro, el valor real y el cambio entre el valor en situación basal (Día 1, antes de la primera administración del fármaco en estudio) y el valor en cada momento de evaluación. Esto incluirá hematología, bioquímica clínica, coagulación y urianálisis. En el caso de valores repetidos, se empleará el último valor no perdido por día/tiempo del estudio. En el caso de que los datos del Día 1 de un paciente/parámetro concreto no se encuentren disponibles, el valor obtenido en el reclutamiento sustituirá al valor basal.

La severidad de las determinaciones de laboratorio seleccionadas se evaluará con arreglo a los criterios CTCAE (p.ej., aquellas determinaciones que posean una clasificación en grados según CTCAE). Las determinaciones que integren grados CTCAE  $\geq 3$  serán presentadas en un listado. Asimismo se generarán, con arreglo a las clasificaciones CTCAE, tablas de cambio que presentarán los cambios entre la situación basal y su evolución “a peor en el estudio”, y cambios entre la situación basal y “al final del estudio”.

### **19.5.7 Procedimientos para el manejo de datos perdidos**

No está prevista la imputación de los datos de eficacia perdidos. Los pacientes de los que no exista respuesta documentada a partir de la situación basal, serán consignados como fallos en los análisis de TRG, TBC y TCE. Para los análisis de tiempo hasta un acontecimiento, los pacientes que carezcan de evaluaciones de eficacia serán considerados como censurados en el tiempo 0. Para la SLP, los pacientes que no hayan experimentado PE o no se les considere evaluables en el análisis final, serán censurados en la fecha en la que el alcance de su respuesta haya sido evaluada por última vez. Para la SG se seguirá a los pacientes hasta la pérdida del seguimiento, retirada o muerte. Los pacientes serán censurados en la última fecha en la que se tuviera conocimiento de que estaban vivos, independientemente del estatus de la enfermedad.

No se imputarán las fechas perdidas en el caso de los EAs; sin embargo, si existen fechas parciales disponibles, éstas se emplearán para determinar si un EA ha ocurrido durante el periodo de tratamiento. No se imputarán los datos perdidos relativos a la severidad de los EAs, y se considerarán perdidos en todas las tabulaciones que aborden la severidad de los EAs. Si se pierde la respuesta a la cuestión de si un EA guarda relación con el tratamiento, se considerará que ese EA sí guarda relación con el tratamiento.

### **19.6 Cambios en la dirección del estudio o en los análisis previstos**

Se consignarán todas las desviaciones del plan de análisis estadístico original, y se incluirán en el informe final del estudio clínico.

## **20 OBLIGACIONES REGULATORIAS, ÉTICAS Y LEGALES**

### **20.1 Obligaciones regulatorias y éticas**

Este estudio se diseñó, se implementará y divulgará de acuerdo con las Guías Tripartitas Armonizadas de la Conferencia Internacional de Armonización (ICH) para la BPC, con las regulaciones locales de aplicación, incluida la Directiva Europea 2001/20/EC, el título 21 del Código de Regulaciones Federales de los EE.UU. y la División 5 de las Regulaciones de Salud de Canadá para Alimentos y Fármacos-Fármacos para Ensayos Clínicos con Seres Humanos, y de acuerdo con los principios éticos establecidos en la Declaración de Helsinki.

### **20.2 Comités de Revisión de las Instituciones/Comités de Ética**

El protocolo y el DCI propuestos deben ser revisados y aprobados, antes del inicio del estudio, por los debidamente constituidos CRI/CEI/Junta de Ética en la Investigación (JEI). Antes del inicio del estudio se insta al investigador a firmar en la página de firmas del protocolo, mostrando su

conformidad en cuanto a dirigir el estudio de acuerdo con estos documentos y con todas las instrucciones y procedimientos que aparecen en este protocolo; y su conformidad en permitir el acceso a todos los datos y registros relevantes a PETHEMA, a representantes del Control de Calidad, agentes designados por PETHEMA, CRIs, CEIs, JEIs y autoridades reguladoras, si se requiriera.

### **20.3 Aprobación de las autoridades reguladoras**

Antes de la implementación de este estudio, el protocolo debe ser aprobado por la autoridad reguladora pertinente.

### **20.4 Cumplimiento del protocolo**

Los investigadores constatan que obrarán con la mayor diligencia para evitar desviaciones del protocolo. Todas las desviaciones relevantes del protocolo serán consignadas y registradas en el CSR.

### **20.5 Enmiendas al protocolo**

Solo se podrán realizar cambios o adiciones en el protocolo mediante una enmienda al protocolo por escrito que deberá ser proporcionada por PETHEMA, y aprobada por las Autoridades Sanitarias si se requiriera, y por los CRI/CEI/JEI. Antes de su aprobación por los CRI/CEI/JEI solo se podrán implementar las enmiendas que se requieran para salvaguardar la seguridad del paciente. A pesar de la necesidad de la aprobación de las enmiendas formales al protocolo, se espera que el investigador lleve a cabo cualquier acción inmediata que se requiera para la seguridad de cualquier paciente incluido en este estudio, incluso aunque dicha acción represente una desviación del protocolo. En tales casos, debe notificarse dicha acción a PETHEMA y también a los CRI/CEI/JEI en el centro participante, de acuerdo con las normativas locales (p.ej., en el Reino Unido se requiere que las acciones urgentes en el ámbito de la seguridad se comuniquen en el plazo de tres días), pero no más tarde de diez días laborables.

### **20.6 Consentimiento informado**

Los pacientes reclutables podrán ser incluidos en el estudio solo después de haber proporcionado consentimiento informado por escrito (con testigos donde la ley o regulación así lo requieran), aprobado por CRI/CEI/JEI.

El consentimiento informado se debe obtener antes de llevar a cabo cualquiera de los procedimientos específicos del estudio (es decir, todos los procedimientos descritos en este protocolo). El proceso de obtención del consentimiento informado se debe registrar en los

documentos fuente del paciente. Las fechas reales en las que se obtengan los consentimientos informados de los pacientes quedarán registradas en sus eCRDs.

PETHEMA suministrará a los investigadores en un documento aparte una propuesta de formulario de consentimiento informado (DCI) que se considera apropiado para este estudio, y cumple las pautas de la ICH de BPC, así como los requerimientos regulatorios. PETHEMA, o la/s persona/s que designe, debe manifestar que está de acuerdo con cualquier cambio en el DCI sugerido por el investigador antes de su remisión a los CRI/CEI/JEI, y después de la aprobación por estos comités se debe suministrar una copia de la versión aprobada a PETHEMA, o a la/s persona/s que designe. Además, se pedirá consentimiento para obtener/almacenar una muestra de sangre para futuros análisis, lo cual es justificable debido a los rápidos avances en el conocimiento en este campo. En el DCI de cada paciente quedará reflejado que las muestras recogidas podrán ser usadas en investigaciones farmacogenómicas.

## **20.7 Confidencialidad del paciente y divulgación**

Con objeto de respetar la privacidad de los pacientes, éstos serán identificados por su número de paciente en todos los informes de casos, registros de recuento de los fármacos en estudio, informes relativos al estudio, muestras biológicas y comunicaciones. El investigador suministrará acceso a los documentos fuente médicos del paciente a los inspectores y posibles auditores o personas designadas y a las autoridades reguladoras, de modo que puedan revisar los datos existentes en los formularios de informes de casos y auditar el proceso de recopilación de datos. Se mantendrá la confidencialidad y no se divulgará la identidad de los pacientes más allá de lo que la ley y regulaciones relevantes permitan, entre éstas la Ley Orgánica 3/2018, del 5 de diciembre, sobre la Protección de Datos Personales y la garantía de los derechos digitales, así como los artículos 23 y 24 de la Ley Orgánica 15/1999 del 13 de diciembre, y el Reglamento General de Protección de Datos, también conocido como RGPD (UE 2016 / 679), que entró en vigor el 25 de mayo de 2018.

El sujeto posee el derecho de pedir, a través del investigador, acceso a sus datos personales, y el derecho de pedir la rectificación de cualquier dato que no esté correcto o completo. Se darán pasos razonables con objeto de responder a tal petición, teniendo en cuenta la naturaleza de esta, las condiciones del estudio, y las leyes y normativas aplicables.

## **20.8 Conservación de muestras a largo plazo para futuras investigaciones**

Las muestras recogidas en este estudio se pueden almacenar durante 15 años (o lo establecido de acuerdo con las normativas locales) para investigaciones adicionales. Las muestras solo se usarán para estudiar y comprender la enfermedad en estudio, los mecanismos de acción y la respuesta a

productos en investigación, para entender las distintas respuestas a los citados productos y otras cuestiones científicas que puedan surgir de la investigación y ser relevantes para los pacientes con MM. La investigación puede comenzar en cualquier momento, durante el estudio o en el periodo de almacenamiento posterior.

Las muestras serán obtenidas y entregadas con arreglo al Apéndice 7, consúltese esa sección para encontrar información adicional sobre el proceso. Solo tendrán acceso a las muestras los trabajadores autorizados de los centros designados.

Las muestras almacenadas se codificarán en el momento de su almacenamiento y proceso de análisis, y no se etiquetarán con datos personales que puedan conducir a identificar la identidad del sujeto. Los sujetos pueden retirar su consentimiento de modo que sus muestras no sean almacenadas para investigación a menos que estén anonimizadas.

Una vez que el ensayo haya finalizado, las muestras biológicas existentes se integrarán en la colección de los siguientes biobancos:

- Biobanco de la Universidad de Navarra, incluida en el Registro Nacional de Biobancos/Sección Colecciones, con la referencia B.0000612
- Biobanco de la Red de enfermedades oncológicas de Castilla y León (BEOCYL), incluido en el Registro Nacional de Biobancos/Sección Colecciones, con la referencia B.0000734
- Biobanco del Hospital U. 12 de Octubre, incluido en el Registro Nacional de Biobancos/Sección Colecciones, con la referencia B.0000657

## **20.9 Compilación, autorización de la documentación sobre el estudio y almacenamiento de datos**

### **20.9.1 Documentación del estudio, mantenimiento de registros y retención de documentos**

Cada centro participante mantendrá los registros médicos y de investigación pertinentes para este ensayo, de conformidad con la Sección 4.9 de la ICH para BPC, documento E6, y con los requerimientos regulatorios e institucionales para la protección de la confidencialidad de los pacientes. Cada centro permitirá examinar (y cuando así lo requiera la ley de aplicación, copiar) los registros clínicos a los representantes autorizados por el promotor y a las agencias reguladoras, con objeto de realizar revisiones de control de calidad, auditorías y evaluaciones de la seguridad y del avance del estudio.

Los documentos fuente son toda la información, informes originales de hallazgos clínicos, observaciones u otras actividades en un ensayo clínico, necesarias para la reconstrucción y evaluación del ensayo. Ejemplos de estos documentos originales y registros de datos incluyen, pero no están limitados a, informes clínicos, registros/listados clínicos y de consulta, notas de laboratorio, memoranda, listados de evaluación, registros farmacéuticos de dispensación, datos registrados a partir de instrumentos automatizados, copias o transcripciones certificadas como precisas y completas tras su verificación, microficheros, negativos fotográficos, microfilms o medios magnéticos, rayos X, y documentos y registros del paciente en la farmacia, laboratorios y departamentos médico-técnicos involucrados en el ensayo clínico.

La recogida de datos es responsabilidad del personal del ensayo clínico en el centro participante, bajo la supervisión del investigador principal de ese centro. El eCRD del estudio constituye el principal instrumento de recogida de datos del estudio. El investigador debe asegurarse acerca de la precisión, exhaustividad, y puntualidad de los datos registrados en los eCRDs y en todos los demás informes que se requieran. Los datos registrados en los eCRDs, que provienen de los documentos fuente, deben ser coherentes con estos. De lo contrario, las discrepancias se deben explicar. Se deben registrar todos los datos que se piden en el eCRD. Deben aportarse explicaciones acerca de todos los datos perdidos. El sistema mantendrá un seguimiento de auditoría para los eCRDs.

El investigador/institución debe conservar los documentos del ensayo tal y como se especifica en Documentos Esenciales para la Realización de un Ensayo Clínico (Sección 8 de la ICH para BPC, documento E6), y tal como lo requieran las normativas y/o directrices aplicables. El investigador/institución debe adoptar las medidas oportunas para prevenir la destrucción accidental o prematura de estos documentos.

Los documentos esenciales (escritos y electrónicos) deben conservarse durante un periodo no inferior a veinticinco (25) años a partir de la finalización del ensayo clínico, a menos que el promotor conceda permiso por escrito para deshacerse de ellos, o requiera su almacenamiento durante un periodo de tiempo adicional debido a las leyes de aplicación, normativas y/o directrices.

#### **20.9.2 Procedimiento de auditado**

Además de los procedimientos rutinarios de monitorización, el promotor o la autoridad reguladora, pueden dirigir una auditoría o una inspección (durante el estudio o tras su finalización) para evaluar el cumplimiento del protocolo y de los principios de BPC.

El investigador se compromete a que los representantes del promotor o las autoridades reguladoras posean acceso directo, tanto durante como después de la realización del estudio, para auditar y revisar todos los registros médicos relevantes para el estudio.

En el caso de que suceda una incidencia mayor relacionada con el cumplimiento o con las normativas, el promotor puede llevar a cabo una auditoría sin previo aviso.

#### **20.10 Divulgación de información**

Toda la información que PETHEMA, o la/s persona/s que designe, transfiera al investigador se mantendrá en la más estricta confidencialidad. Tal información no será divulgada excepto si el investigador posee un derecho de publicación que se le haya concedido en el Contrato del Ensayo Clínico.

Excepto cuando la ley lo requiera, no se facilitará información acerca del estudio a nadie que no esté involucrado en el mismo, excepción hecha de PETHEMA, o sus representantes autorizados, o confidencialmente al CRI o comité similar.

#### **20.11 Suspensión del estudio**

Se acuerda que, de existir un motivo razonable, bien el investigador o PETHEMA pueden dar por concluida la participación del investigador en este estudio tras la presentación de una notificación por escrito. Mediante una notificación inmediata, PETHEMA puede dar por concluido el estudio en cualquier momento por cualquier causa, incluida la opinión del promotor de que la suspensión del estudio es necesaria para la seguridad de los pacientes.

### **21 RESPONSABILIDAD Y SEGURO**

El promotor ha firmado una póliza de seguro que, de acuerdo con sus términos y condiciones, cubre la responsabilidad legal en relación con cualquier perjuicio que los participantes sufran como resultado de esta investigación de acuerdo con lo legalmente establecido, que se llevará a cabo en estricto cumplimiento del protocolo científico y de los estándares profesionales y legislativos correspondientes. La compañía de seguros es HDI GLOBAL SE, cuya sede está registrada en Madrid, C/ Luchana 23; número de la póliza: 08054309-14288.

## **22 INFORMES SOBRE EL ESTUDIO, POLÍTICA DE PUBLICACIÓN Y ARCHIVADO DE LA DOCUMENTACIÓN SOBRE EL ESTUDIO**

### **22.1 Informes sobre el estudio y política de publicación**

PETHEMA garantiza que los elementos clave del diseño de este protocolo se mostrarán en una base de datos accesible públicamente, tal como “[www.clinicaltrials.gov](http://www.clinicaltrials.gov)”. Además, a la finalización del estudio y de la realización de los informes pertinentes, los resultados serán enviados para su publicación y/o expuestos en una base de datos de acceso público, de resultados de estudios clínicos.

## 23 REFERENCIAS

1. Chen C, Gutiérrez M, de Nully Brown P, et al. Anti-Tumor Activity of SELINEXOR (KPT-330), an Oral Selective Inhibitor of Nuclear Export (SINE), ± Dexamethasone in Multiple Myeloma Preclinical Models and Translation in Patients with Multiple Myeloma. EHA 19th Annual Congress; June 12 — 15, 2014; Milan, Italy.
2. Vogl DT, Dingli D, Cornell RF, et al. Selinexor and low dose dexamethasone (Sd) in patients with lenalidomide, pomalidomide, bortezomib, carfilzomib and anti-CD38 Ab refractory multiple myeloma (MM): STORM Study. Paper presented at: American Society of Hematology (ASH) 58th Annual Meeting and Exposition; December 3-6, 2016; San Diego, CA.
3. Bahlis N, Chen C, Sebag M, et al. A phase 1B/2 study of selinexor in combination with backbone therapies for treatment of relapsed/refractory multiple myeloma. EHA 21st Annual Congress; June 9 – 12, 2016; Copenhagen, Denmark.
4. DuBois D, DuBois EF. A formula to estimate the approximate surface area if height and weight be known. Arch Intern Medicine. 1916;17:863-871.
5. Mosteller RD. Simplified calculation of body-surface area. N Engl J Med. 1987;317:1098.
6. Oken MM, Creech RH, Tormey DC, et al. Toxicity and response criteria of the Eastern Cooperative Oncology Group. Am J Clin Oncol. 1982;5:649-655.
7. Etchin J, Sanda T, Mansour MR, Kentsis A, Montero J, Le BT, Christie AL, McCauley D, Rodig SJ, Kauffman M, Shacham S, Stone R, Letai A, Kung AL, ThomasLook A. KPT-330 inhibitor of CRM1 (XPO1)-mediated nuclear export has selective anti-leukaemic activity in preclinical models of T-cell acute lymphoblastic leukaemia and acute myeloid leukaemia. Br J Haematol. 2013;161(1):117-27.
8. Etchin, J, Sun, Q, Kentsis, A, et al. Antileukemic activity of nuclear export inhibitors that spare normal hematopoietic cells. Leukemia. 2013; 27(1): 66–74.
9. Shacham S, Barnard S, Kisseberth W, et al. Results of a Phase I Dose Escalation Study of the Novel, Oral CRM1 Selective Inhibitor of Nuclear Export (SINE) KPT-335 in Dogs with Spontaneous Non-Hodgkin's Lymphomas (NHL). Blood. 2012;120(21):161.
10. Usmani SZ, Weiss BM, Plesner T, et al. Clinical efficacy of daratumumab monotherapy in patients with heavily pretreated relapsed or refractory multiple myeloma. Blood. 2016;128(1):37-44.
11. Richardson PG, Barlogie B, Berenson J, et al. A phase 2 study of bortezomib in relapsed, refractory myeloma. N Eng J Med. 2003;348(26):2609-17.
12. Richardson PG, Sonneveld P, Schuster MW, et al. Bortezomib or high-dose dexamethasone for relapsed multiple myeloma. N Eng J Med. 2005;352(24):2487-98.
13. Richardson PG, Sonneveld P, Schuster MW, et al. Extended follow-up of a phase 3 trial in relapsed multiple myeloma: final time-to-event results of the APEX trial. Blood. 2007;110(10):3557-60.
14. Moreau P, Pylypenko H, Grosicki S, et al. Subcutaneous versus intravenous administration of bortezomib in patients with relapsed multiple myeloma: a randomised, phase 3, non-inferiority study. Lancet Oncol. 2011;12(5):431-40.

15. Turner JG, Dawson J, Emmons MF, Cubitt CL, Kauffman M, Shacham S, Hazlehurst LA, Sullivan DM. CRM1 Inhibition Sensitizes Drug Resistant Human Myeloma Cells to Topoisomerase II and Proteasome Inhibitors both In Vitro and Ex Vivo. *J Cancer*. 2013 Sep 10;4(8):614-25.
16. Palumbo A, Chanan-Khan A, Weisel K et al. Daratumumab, Bortezomib and Dexamethasone for multiple myeloma. *N Eng J Med*. 2016;375(8):754-66.
17. Raab MS, Podar K, Breitkreutz I, Richardson PG, Anderson KC. Multiple myeloma. *Lancet*. 2009;374: 324-339.
18. Kumar SK, Dispenzieri A, Lacy MQ, Gertz MA, Buadi FK, Pandey S, Kapoor P, Dingli D, Hayman SR, Leung N, Lust J, McCurdy A, Russell SJ, Zeldenrust SR, Kyle RA, Rajkumar SV. Continued improvement in survival in multiple myeloma: changes in early mortality and outcomes in older patients. *Leukemia*. 2014;28(5):1122-8.
19. Lohr JG, Stojanov P, Carter SL, Cruz-Gordillo P, Lawrence MS, Auclair D, Sougnez C, Knoechel B, Gould J, Saksena G, Cibulskis K, McKenna A, Chapman MA, Straussman R, Levy J, Perkins LM, Keats JJ, Schumacher SE, Rosenberg M; Multiple Myeloma Research Consortium, Getz G, Golub TR. Widespread genetic heterogeneity in multiple myeloma: implications for targeted therapy. *Cancer Cell*. 2014 Jan 13;25(1):91-101.
20. Keats JJ, Fonseca R, Chesi M, Schop R, Baker A, Chng WJ, Van Wier S, Tiedemann R, Shi CX, Sebag M, Braggio E, Henry T, Zhu YX, Fogle H, Price-Troska T, Ahmann G, Mancini C, Brents LA, Kumar S, Greipp P, Dispenzieri A, Bryant B, Mulligan G, Bruhn L, Barrett M, Valdez R, Trent J, Stewart AK, Carpten J, Bergsagel PL. Promiscuous mutations activate the noncanonical NF-kappaB pathway in multiple myeloma. *Cancer Cell*. 2007 Aug;12(2):131-44.
21. Kyle RA, Rajkumar SV. Multiple myeloma. *N Engl J Med*. 2004;351:1860-1873.
22. International Myeloma Working Group updated criteria for the diagnosis of multiple myeloma Rajkumar, S Vincent et al. *The Lancet Oncology* 2014 , Volume 15 , Issue 12 , e538 - e548
23. Greipp PR, San Miguel J, Durie BG, et al. International staging system for multiple myeloma. *J Clin Oncol*. 2005;23:3412-3420.
24. Turner JG, Dawson J, Sullivan DM. Nuclear export of proteins and drug resistance in cancer. *Biochem Pharmacol*. 2012;83(8):1021-1032.
25. Senapedis WT, Baloglu E, Landesman Y. Clinical translation of nuclear exportinhibitors in cancer. *Semin Cancer Biol*. 2014 Aug;27C:74-86.
26. Sharpless NE, DePinho RA. Cancer biology: gone but not forgotten. *Nature*. 2007;445(7128):606-7.
27. Tan DS, Bedard PL, Kuruvilla J, Siu LL, Razak AR. Promising SINEs for embargoing nuclear-cytoplasmic export as an anticancer strategy. *Cancer Discovery*. 2014;4(5):527-37.
28. Yang J, Bill MA, Young GS, La Perle K, Landesman Y, Shacham S, Kauffman M, Senapedis W, Kashyap T, Saint-Martin JR, Kendra K, Lesinski GB. Novel Small Molecule XPO1/CRM1 Inhibitors Induce Nuclear Accumulation of TP53, Phosphorylated MAPK and Apoptosis in Human Melanoma Cells. *PLoS One*. 2014 Jul 24;9(7):e102983.
29. Brown CJ, Dastidar SG, Quah ST, et al. C-terminal substitution of MDM2 interacting peptides modulates binding affinity by distinctive mechanisms. *PLoS One*. 2011;6(8):e24122.

30. Golomb L, Bublik DR, Wilder S, et al. Importin 7 and exportin 1 link c-myc and p53 to regulation of ribosomal biogenesis. *Mol Cell*. 2012;45:222-232.
31. Xu D, Farmer A, Chook YM. Recognition of nuclear targeting signals by Karyopherin-beta proteins. *Curr Opin Struct Biol*. 2010;20(6):782-790.
32. Turner JG, Sullivan DM. CRM1-mediated nuclear export of proteins and drug resistance in cancer. *Curr Med Chem*. 2008;15(26):2648-55.
33. Tiedemann RE, Zhu YX, Schmidt J, Shi CX, Sereduk C, Yin H, Mousses S, Stewart AK. Identification of molecular vulnerabilities in human multiple myeloma cells by RNA interference lethality screening of the druggable genome. *Cancer Res*. 2012;72(3):757-68.
34. Tai Y-T, Landesman Y, Acharya C, Calle Y, et al. CRM1 inhibition induces tumor cell cytotoxicity and impairs osteoclastogenesis in multiple myeloma: molecular mechanisms and therapeutic implications. *Leukemia*. 2014;28:155-165.
35. Lain S, Xirodimas D, Lane DP. Accumulating active p53 in the nucleus by inhibition of nuclear export: a novel strategy to promote the p53 tumor suppressor function. *Exp Cell Res*. 1999;253(2):315-324.
36. Turner JG, Dawson J, Cubitt CL, Baz R, Sullivan DM. Inhibition of CRM1-dependent nuclear export sensitizes malignant cells to cytotoxic and targeted agents. *Semin Cancer Biol*. 2014 Aug;27C:62-73.
37. Van der Watt PJ, Maske CP, Hendricks DT, et al. The Karyopherin proteins, Crm1 and Karyopherin beta1, are overexpressed in cervical cancer and are critical for cell survival and proliferation. *Int J Cancer*. 2009;124(8):1829-1840.
38. Gray LJ, Bjelogrljic P, Appleyard VC, et al. Selective induction of apoptosis by leptomycin B in keratinocytes expressing HPV oncogenes. *Int J Cancer*. 2007;120(11):2317-2324.
39. Mutka SC, Yang WQ, Dong SD, et al. Identification of nuclear export inhibitors with potent anticancer activity in vivo. *Cancer Res*. 2009;69(2):510-517.
40. Newlands ES, Rustin GJ, Brampton MH. Phase I trial of elactocin. *Br J Cancer*. 1996;74(4):648-649.
41. Roberts BJ, Hamelehle KL, Sebolt JS, Leopold WR. In vivo and in vitro anticancer activity of the structurally novel and highly potent antibiotic CI-940 and its hydroxy analog (PD 114,721). *Cancer Chemother Pharmacol*. 1986;16(2):95-101.
42. Zhang K, Wang M, Tamayo AT, et al. Novel selective inhibitors of nuclear export CRM1 antagonists for therapy in mantle cell lymphoma. *Exp Hematol*. 2013;41(1):67-78.
43. Ranganathan P, Yu X, Na C, et al. Preclinical activity of a novel CRM1 inhibitor in acute myeloid leukemia. *Blood*. 2012;120(9):1765–1773.
44. Kojima K, Kornblau SM, Ruvolo V, et al. Prognostic impact and targeting of CRM1 in acute myeloid leukemia. *Blood*. 2013;121(20):4166–4174.
45. Walker CJ, Oaks JJ, Santhanam R, et al. Preclinical and clinical efficacy of XPO1/CRM1 inhibition by the karyopherin inhibitor KPT-330 in Ph+ leukemias. *Blood*. 2013;22(17):3034–3044.

46. Schmidt J, Braggio E, Kortuem KM, et al. Genome-wide studies in multiple myeloma identify XPO1/CRM1 as a critical target validated using the selective nuclear export inhibitor KPT-276. *Leukemia*. 2013;27(12):2357-65.
47. Falini B, Nicoletti I, Martelli MF, Mecucci C. Acute myeloid leukemia carrying cytoplasmic/mutated nucleophosmin (NPMc+ AML): biologic and clinical features. *Blood*. 2007;109(3):874-85.
48. Azmi AS, Al-Katib A, Aboukameel A, et al. Selective inhibitors of nuclear export for the treatment of non-Hodgkin's lymphomas. *Haematologica*. 2013;98(7):1098-1106.
49. Fragomeni RAS, Chung HW, Landesman Y, et al. CRM1 and BRAF inhibition synergize and induce tumor regression in BRAF-mutant melanoma. *Mol Cancer Ther*. 2013;12(7):1171-9.
50. Gaubatz S, Lees JA, Lindeman GJ, Livingston DM. E2F4 is exported from the nucleus in a CRM1-dependent manner. *Mol Cell Biol*. 2001;21(4):1384-92.
51. Lapalombella R, Sun Q, Williams K, et al. Selective inhibitors of nuclear export show that CRM1/XPO1 is a target in chronic lymphocytic leukemia. *Blood*. 2012;120(23):4621-4634.
52. Altura RA, Olshefski RS, Jiang Y, Boué DR. Nuclear expression of survivin in paediatric ependymomas and choroid plexus tumours correlates with morphologic tumour grade. *Br J Cancer*. 2003;89(9):1743-1749.
53. Richardson PG, Jagganath S, Moreau P, et al. Elotuzumab in combination with lenalidomide and dexamethasone in patients with relapsed multiple myeloma: final phase 2 results from the randomised, open-label, phase 1b-2 dose-escalation study. *Lancet Haematol*. 2015;2(12):e516-27.
54. Dimopoulos MA, Lonial S, White D, et al. Elotuzumab plus lenalidomide/dexamethasone for relapsed or refractory multiple myeloma: ELOQUENT-2 follow-up and post-hoc analyses on progression-free survival and tumour growth. *Br J Haematol*. 2017;178(6):896-905.
55. Zonder JA, Mohrbacher AF, Singhal S et al. A phase 1, multicenter, open-label, dose escalation study of elotuzumab in patients with advanced multiple myeloma. *Blood*. 2012;120(3):552-9.
56. Selinexor/KPT-330 Investigator's Brochure, 2019. JNJ-26866138 VELCADE bortezomib, Investigator's Brochure, February 2018. JNJ-54767414 daratumumab, Investigator's Brochure, Diciembre 2019
57. Kyle RA, Yee GC, Somerfield MR, et al. American Society of Clinical Oncology 2007 clinical practice guideline update on the role of bisphosphonates in multiple myeloma. *J Clin Oncol*. 2007;25(17):2464-72.
58. Chapuy CL, Nicholson RT, Aguad MD, et al. Resolving the daratumumab interference with blood compatibility testing. *Transfusion*. 2015;55(6Pt2):1545-1554.
59. Kumar SK, Paiva B, Anderson KC, et al. International Myeloma Working Group consensus criteria for response and minimal residual disease assessment in multiple myeloma. *Lancet Oncol*. 2016;17(8):328-346.
60. Palumbo A, Avet-Loiseau H, Oliva S, et al. Revised International Staging System for Multiple Myeloma: A Report from International Myeloma Working Group. *J Clin Oncol*. 2015; 10;33(26):2863-9.

61. National Comprehensive Cancer Network®. NCCN Clinical Practice Guidelines in Oncology (NCCN Guidelines®): Antiemesis, version 2.2014. Fort Washington, NY. April 2014. Available at: [http://www.nccn.org/professionals/physician\\_gls/PDF/antiemesis.pdf](http://www.nccn.org/professionals/physician_gls/PDF/antiemesis.pdf). Accessed 10 Sep 2014
62. National Comprehensive Cancer Network®. NCCN Clinical Practice Guidelines in Oncology (NCCN Guidelines®): Palliative Care, version 1.2014. Fort Washington, NY. April 2014. Available at: [http://www.lls.org/content/nationalcontent/resourcecenter/freeeducationmaterials/general\\_cancer/pdf/facts.pdf](http://www.lls.org/content/nationalcontent/resourcecenter/freeeducationmaterials/general_cancer/pdf/facts.pdf). Accessed 10 Sep 2014.
63. Lonial S, Weiss BM, Usmani SZ, et al. Daratumumab monotherapy in patients with treatment-refractory multiple myeloma (SIRIUS): an open-label, randomised, phase 2 trial. Lancet 2016;387:1551-1560
64. Palumbo A, Chanan-Khan A, Weisel K, et al. Daratumumab, bortezomib and dexamethasone for multiple myeloma. N Engl J Med 2016;375:754-76
65. Dimopoulos MA, Oriol A, Nahi H, et al. Daratumumab, Lenalidomide, and Dexamethasone for Multiple Myeloma. N Engl J Med 2016;375:1319-31
66. Mateos MV et al. Efficacy and Safety of Daratumumab, Bortezomib, and Dexamethasone (D-Vd) Versus Bortezomib and Dexamethasone (Vd) in First Relapse Patients With Multiple Myeloma (MM): Update of CASTOR. Presentado en 60ª reunión ASH, San Diego diciembre 2018. Poster nº 3270

## APÉNDICE 1 CRITERIOS DEL ESTADO FUNCIONAL *EASTERN COOPERATIVE ONCOLOGY GROUP (ECOG)*

(Referencia: Oken MM, Creech RH, Tormey DC, et al. Toxicity and response criteria of the Eastern Cooperative Oncology Group. Am J Clin Oncol. 1982;5:649-655 [6])

| Escala del estado funcional ECOG |                                                                                                                                                                                                                               |
|----------------------------------|-------------------------------------------------------------------------------------------------------------------------------------------------------------------------------------------------------------------------------|
| Grado                            | Descripciones                                                                                                                                                                                                                 |
| 0                                | Completamente activo, capaz de realizar toda la actividad previa a la enfermedad sin restricciones.                                                                                                                           |
| 1                                | Síntomas, pero ambulatorios. Restricciones en las actividades físicamente intensas, pero ambulatorio y capaz de realizar trabajos de naturaleza ligera o sedentaria (p.ej., tareas domésticas sencillas, trabajo de oficina). |
| 2                                | Menos del 50% del tiempo encamado. Ambulatorio y con capacidad para atender sus necesidades, pero incapacidad para cualquier actividad laboral. Levantado más del 50% de las horas de vigilia.                                |
| 3                                | Más del 50% del tiempo encamado. Capacidad restringida para los cuidados y el aseo personal. Encamado o sentado más del 50% de las horas de vigilia.                                                                          |
| 4                                | 100% postrado. Incapacidad total. No puede atender ninguna de sus necesidades. Totalmente confinado en una cama o silla.                                                                                                      |
| 5                                | Fallecido.                                                                                                                                                                                                                    |

## APÉNDICE 2 SISTEMA INTERNACIONAL DE ESTADIAJE DE MIELOMA MÚLTIPLE Y SISTEMA INTERNACIONAL DE ESTADIAJE DE MIELOMA MÚLTIPLE REVISADO

Sistema Internacional de Estadiaje:

(Referencia: Greipp PR, San Miguel J, Durie BG, et al. International staging system for multiple myeloma. J Clin Oncol. 2005;23:3412-3420 [23])

| Estadio     | Características                                                                                                                                  |
|-------------|--------------------------------------------------------------------------------------------------------------------------------------------------|
| Estadio I   | $\beta_2$ -microglobulina <3,5 mg/L, albúmina $\geq$ 3,5 g/dL                                                                                    |
| Estadio II  | $\beta_2$ -microglobulina <3,5 mg/L y albúmina <3,5 g/dL, o $\beta_2$ -microglobulina 3,5-<br><5,5 mg/L independientemente de la albúmina sérica |
| Estadio III | $\beta_2$ -microglobulina $\geq$ 5,5 mg/L                                                                                                        |

Sistema Internacional de Estadiaje de Mieloma Múltiple revisado:

(Referencia: Palumbo A, Avet-Loiseau H, Oliva S, et al. Revised International Staging System for Multiple Myeloma: A Report from International Myeloma Working Group. J Clin Oncol. 2015, 10;33(26):2863-9 [60]).

| Estadio | Características                                                                   |
|---------|-----------------------------------------------------------------------------------|
| R-ISS 1 | ISS 1 y anomalías citogenéticas de riesgo estándar por iFISH y LDH normal         |
| R-ISS 2 | No cumple criterios ni de R-ISS 1 ni de R-ISS 3                                   |
| R-ISS 3 | ISS 3 y, o bien anomalías citogenéticas de alto riesgo por iFISH, o bien LDH alta |

Las anomalías citogenéticas de alto riesgo se definen por la presencia de al menos una de las siguientes anomalías citogenéticas: del(17p), t(4;14)(p16;q32) o t(14;16)(q32;q23). R-ISS, *Revised Multiple Myeloma International Staging System*; iFISH, hibridación fluorescente *in situ* en interfase.

## APÉNDICE 3 CRITERIOS DE RESPUESTA DEL GRUPO DE TRABAJO INTERNACIONAL DE MIELOMA (IMWG)

(MODIFICADO A PARTIR DE KUMAR S *ET AL*, LANCET ONCOLOGY 2016 [59])

| Categoría                                          | Criterios de respuesta                                                                                                                                                                                                                                                                                                                                                                               |
|----------------------------------------------------|------------------------------------------------------------------------------------------------------------------------------------------------------------------------------------------------------------------------------------------------------------------------------------------------------------------------------------------------------------------------------------------------------|
| EMR-negativa por secuenciación                     | RC y ausencia de células plasmáticas clonales por NGS en aspirado de médula ósea, donde presencia de un clon se define como menos de dos lecturas idénticas de secuencia obtenidas tras la secuenciación del DNA de aspirados de médula ósea empleando la plataforma LymphoSIGHT (o método equivalente validado) con un mínimo de sensibilidad de 1 en 10 <sup>5</sup> células nucleadas o superior. |
| EMR-negativa por citometría de flujo               | RC y ausencia de células plasmáticas clonales fenotípicamente aberrantes por citometría de flujo de nueva generación (NGF) en aspirado de médula ósea empleando el procedimiento operativo estándar de EuroFlow para la detección de EMR en MM (o método equivalente validado) con un mínimo de sensibilidad de 1 en 10 <sup>5</sup> células nucleadas o superior.                                   |
| Evidencia de respuesta por imagen más EMR-negativa | RC y negatividad en EMR definida por NGF o NGS, más desaparición de cualquier área de aumento de captación de trazador encontrada en situación basal o en un PET/TC previo, o disminución del valor de captación estandarizado (SUV) a valores inferiores al <i>pool</i> sanguíneo del mediastino o al tejido normal circundante.                                                                    |
| Respuesta completa estricta (RCe)                  | RC (según se define abajo) más ratio normal de CLL y ausencia de células plasmáticas clonales en biopsia de médula ósea por inmunohistoquímica (ratio $\kappa/\lambda \leq 4:1$ o $\geq 1:2$ en pacientes $\kappa$ y $\lambda$ respectivamente, tras contar $\geq 100$ células plasmáticas).                                                                                                         |
| Respuesta completa (RC)                            | Resultados negativos en la prueba de inmunofijación en suero y orina y desaparición de cualquier plasmocitoma y <5% de células plasmáticas en aspirados de médula ósea.                                                                                                                                                                                                                              |
| Muy Buena Respuesta Parcial (MBRP)                 | Proteína M detectable en suero y orina mediante inmunofijación, no así mediante electroforesis, o reducción $\geq 90\%$ del componente M en suero, más componente M en orina <100 mg/24 h.                                                                                                                                                                                                           |

|                            |                                                                                                                                                                                                                                                                                                                                                                                                                                                                                                                                                                                                                                                                                                                                                                                                                                                                                                                                                                                                                                                                                                                                                                                                                                                                                                                                                                                                                                                    |
|----------------------------|----------------------------------------------------------------------------------------------------------------------------------------------------------------------------------------------------------------------------------------------------------------------------------------------------------------------------------------------------------------------------------------------------------------------------------------------------------------------------------------------------------------------------------------------------------------------------------------------------------------------------------------------------------------------------------------------------------------------------------------------------------------------------------------------------------------------------------------------------------------------------------------------------------------------------------------------------------------------------------------------------------------------------------------------------------------------------------------------------------------------------------------------------------------------------------------------------------------------------------------------------------------------------------------------------------------------------------------------------------------------------------------------------------------------------------------------------|
| Respuesta parcial (RP)     | <ol style="list-style-type: none"> <li>1. Reducción <math>\geq 50\%</math> de los valores séricos de proteína M más reducción <math>\geq 90\%</math> o hasta un valor <math>&lt; 200</math> mg/24 h en los valores de proteína M en una muestra de orina de 24 horas.</li> <li>2. Si la proteína M en suero y orina no es medible, se requiere una disminución <math>\geq 50\%</math> en la diferencia entre los valores de CLLs implicadas y no implicadas, en lugar del criterio de la proteína M.</li> <li>3. Si la proteína M en suero y orina no es medible y tampoco se puede llevar a cabo el ensayo de las CLLs, en su lugar, se requiere una reducción en las células plasmáticas <math>\geq 50\%</math>, siempre y cuando el porcentaje basal de células plasmáticas en médula ósea haya sido <math>\geq 30\%</math>.</li> <li>4. Aparte de los criterios anteriores, en caso de existir plasmocitomas o masas de partes blandas en situación basal, deberá producirse una reducción en su tamaño <math>\geq 50\%</math>.</li> </ol>                                                                                                                                                                                                                                                                                                                                                                                                     |
| Respuesta mínima (RM)      | Reducción de la concentración de proteína M en suero $\geq 25\%$ pero $\leq 49\%$ , y reducción del 50-89% en la concentración de proteína M en orina de 24 horas. Además, en caso de estar presentes en el momento basal, también deberá darse una reducción $\geq 50\%$ en el tamaño de los plasmocitomas o masas de partes blandas.                                                                                                                                                                                                                                                                                                                                                                                                                                                                                                                                                                                                                                                                                                                                                                                                                                                                                                                                                                                                                                                                                                             |
| Enfermedad estable (EE)    | No se recomienda su uso como un indicador de respuesta; como mejor se describe la estabilidad de la enfermedad es proporcionando las estimaciones del THP.<br>Cuando no se satisfagan los criterios de RC, MBRP, RP, RM o enfermedad progresiva (EP).                                                                                                                                                                                                                                                                                                                                                                                                                                                                                                                                                                                                                                                                                                                                                                                                                                                                                                                                                                                                                                                                                                                                                                                              |
| Enfermedad progresiva (EP) | <p>Incremento del 25 % con respecto al valor de respuesta más bajo confirmado, en uno o más de los siguientes criterios:</p> <ul style="list-style-type: none"> <li>• Concentración sérica de proteína M: incremento absoluto debe ser <math>\geq 0,5</math> g/dL.</li> <li>• Incremento de la concentración sérica de proteína M <math>\geq 1</math> g/dL si el componente M más bajo era <math>\geq 5</math> g/dL.</li> <li>• Componente M en orina: el incremento absoluto debe <ul style="list-style-type: none"> <li>○ ser <math>\geq 200</math> mg/24h.</li> </ul> </li> <li>• Si la proteína M en suero y orina no es medible, se requiere un aumento absoluto <math>&gt; 10</math> mg/dL en la diferencia entre los valores de CLLs implicadas y no implicadas.</li> <li>• Si la proteína M en suero y orina no es medible y tampoco lo son las CLLs, se requiere un aumento absoluto en las células plasmáticas <math>\geq 10\%</math>, independientemente de la cifra basal.</li> <li>• Aparición de nueva/s lesión/es, aumento <math>\geq 50\%</math> a partir del nadir en el tamaño de <math>&gt; 1</math> lesión, o aumento <math>\geq 50\%</math> en el diámetro más largo de una lesión previa que tuviera <math>&gt; 1</math> cm en el eje corto; aumento <math>\geq 50\%</math> en las células plasmáticas circulantes (mínimo de 200 células/<math>\mu</math>L), si éste es el único criterio de enfermedad medible.</li> </ul> |

|                            |                                                                                                                                                                                                                                                                                                                                                                                                                                                                                                                                                                                                                                                                                                                                                                                                                                                                                                                                                                                                                                                                                                                                                                                                                                                                  |
|----------------------------|------------------------------------------------------------------------------------------------------------------------------------------------------------------------------------------------------------------------------------------------------------------------------------------------------------------------------------------------------------------------------------------------------------------------------------------------------------------------------------------------------------------------------------------------------------------------------------------------------------------------------------------------------------------------------------------------------------------------------------------------------------------------------------------------------------------------------------------------------------------------------------------------------------------------------------------------------------------------------------------------------------------------------------------------------------------------------------------------------------------------------------------------------------------------------------------------------------------------------------------------------------------|
| Recaída clínica            | <p>La recaída clínica requiere uno o más de los siguientes criterios:</p> <ul style="list-style-type: none"> <li>• Indicadores directos de enfermedad en aumento y/o disfunción del órgano afectado (datos CRAB) en relación con trastorno proliferativo clonal de células plasmáticas subyacente. No se emplea en el cálculo de THP o SLP.</li> <li>• Desarrollo de nuevos plasmocitomas de partes blandas o lesiones óseas (las fracturas osteoporóticas no constituyen progresión).</li> <li>• Aumento inequívoco en el tamaño de plasmocitomas o lesiones óseas existentes. Se define un aumento inequívoco como un incremento del 50% (<math>y \geq 1</math> cm) en los plasmocitomas de partes blandas (tomando en consideración para este cálculo, el sumatorio de los diámetros máximos de cada lesión).</li> <li>• Hipercalcemia (<math>&gt;11</math> mg/dL).</li> <li>• Disminución en la hemoglobina de <math>\geq 2</math> g/dL, no asociado a la terapia o a otras condiciones no relacionadas con el MM.</li> <li>• Incremento de la cifra de creatinina sérica en <math>\geq 2</math> mg/dl respecto al inicio del tratamiento, que sea claramente atribuible al mieloma.</li> <li>• Hiperviscosidad asociada con paraproteína sérica.</li> </ul> |
| Recaída desde RC           | <p>Uno o más de los siguientes criterios:</p> <ul style="list-style-type: none"> <li>• Reaparición de proteína M en suero u orina por inmunofijación o electroforesis.</li> <li>• Desarrollo <math>\geq 5\%</math> de células plasmáticas en la médula ósea.</li> <li>• Aparición de cualquier otro signo de progresión (p.ej., nuevo plasmocitoma, lesión ósea lítica o hipercalcemia, ver más arriba).</li> </ul>                                                                                                                                                                                                                                                                                                                                                                                                                                                                                                                                                                                                                                                                                                                                                                                                                                              |
| Recaída desde EMR negativa | <p>Uno o más de los siguientes criterios:</p> <ul style="list-style-type: none"> <li>• Pérdida del estado de EMR negativa (evidencia de células plasmáticas clonales por NGF o NGS, o estudio de imagen de recurrencia del MM con resultado positivo).</li> <li>• Reaparición de proteína M en suero u orina por inmunofijación o electroforesis.</li> <li>• Desarrollo <math>\geq 5\%</math> de células plasmáticas en la médula ósea.</li> <li>• Aparición de cualquier otro signo de progresión (p.ej., nuevo plasmocitoma, lesión ósea lítica o hipercalcemia, ver más arriba).</li> </ul>                                                                                                                                                                                                                                                                                                                                                                                                                                                                                                                                                                                                                                                                   |

\*Nota: aclaración de los criterios IMWG acerca de la adjudicación de RC y MBRP a pacientes en los que el único criterio de enfermedad medible sean los niveles séricos de CLLs: en tales pacientes, la RC se define como presentar una ratio CLL normal de 0,26-1,65, además de satisfacer los criterios de RC listados arriba. La MBRP en tales pacientes se define como una disminución  $>90\%$  en la diferencia entre los valores de CLLs implicadas y no implicadas.

Todas las categorías de respuesta (RC, RCe, MBRP y RP) requieren dos determinaciones consecutivas realizadas en cualquier momento antes de la instauración de cualquier nueva terapia; las categorías RC, RP y EE también requieren que, si se han realizado estudios radiográficos, no exista evidencia documentada de lesiones óseas en progresión o nuevas. Los estudios radiográficos no se requieren para satisfacer estos requerimientos de respuesta. Las determinaciones de médula ósea no requieren confirmación.

## APÉNDICE 4 SISTEMA DE CLASIFICACIÓN DE OPACIDADES DEL CRISTALINO III (SCOC III)

Si se detecta una catarata durante la exploración con lámpara de hendidura para documentar la claridad del cristalino, esta se graduará con arreglo a SCOC III.

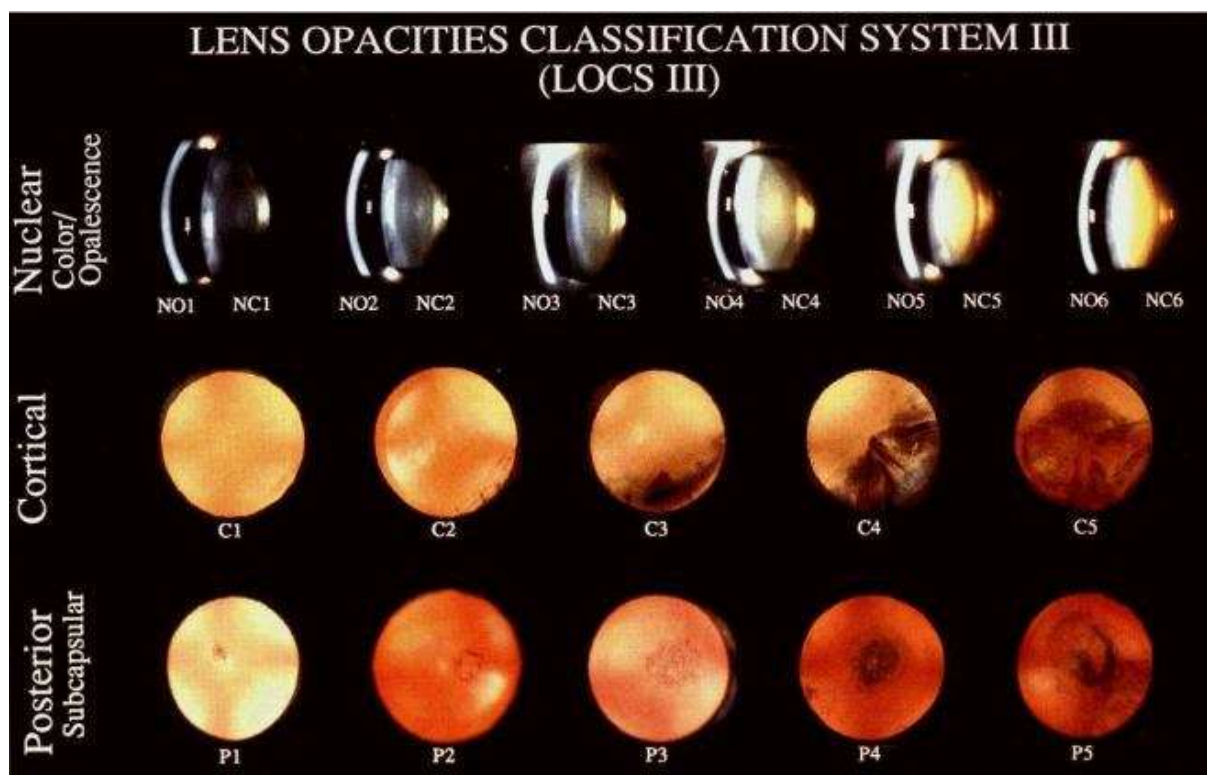

## APÉNDICE 5 PAUTAS NCCN PARA LA PRÁCTICA CLÍNICA EN ONCOLOGÍA: ANTIEMESIS

**NCCN** National Comprehensive Cancer Network® **NCCN Guidelines Version 2.2014** **Antiemesis**

[NCCN Guidelines Index](#)  
[Antiemesis Table of Contents](#)  
[Discussion](#)

**HIGH EMETIC RISK INTRAVENOUS CHEMOTHERAPY - ACUTE AND DELAYED EMESIS PREVENTION<sup>a,b,c</sup>**  
Start before chemotherapy<sup>c,d</sup>  
Neurokinin 1 antagonist containing regimen consisting of the following:

- **Serotonin (5-HT<sub>3</sub>) antagonist (Choose one):<sup>e,f</sup>**
  - ▶ Dolasetron 100 mg PO<sup>g</sup>
  - ▶ Granisetron 2 mg PO daily or 1 mg PO BID or 0.01 mg/kg (max 1 mg) IV day 1<sup>h</sup> or transdermal patch as 3.1 mg/24 h patch (containing 34.3 mg granisetron total dose) applied approximately 24-48 h prior to first dose of chemotherapy; maximum duration of patch is 7 days
  - ▶ Ondansetron 16-24 mg PO or 8-16 mg IV day 1<sup>h,i</sup>
  - ▶ Palonosetron 0.25 mg IV day 1 (preferred)<sup>j</sup>

**AND**

- **Steroid (Choose one):<sup>j</sup>**
  - ▶ Dexamethasone 12 mg PO or IV day 1, 8 mg PO daily days 2-4 (with aprepitant 125 mg)
  - ▶ Dexamethasone 12 mg PO or IV day 1, 8 mg PO day 2, then 8 mg PO BID days 3 and 4 (with fosaprepitant 150 mg IV day 1)

**AND**

- **Neurokinin 1 antagonist (Choose one):**
  - ▶ Aprepitant 125 mg PO day 1, 80 mg PO daily days 2-3
  - ▶ Fosaprepitant 150 mg IV day 1 only
- ± Lorazepam 0.5-2 mg PO or IV or sublingual either every 4 hours or every 6 hours days 1-4
- ± H<sub>2</sub> blocker or proton pump inhibitor

**OR**

- **Olanzapine-containing regimen<sup>k</sup>**
  - ▶ Olanzapine 10 mg PO days 1-4
  - ▶ Palonosetron 0.25 mg IV day 1
  - ▶ Dexamethasone 20 mg IV day 1
  - ± Lorazepam 0.5-2 mg PO or IV or sublingual either every 4 hours or every 6 hours days 1-4
  - ± H<sub>2</sub> blocker or proton pump inhibitor

**category 1 for combined regimens<sup>c</sup>**

**Note:** All recommendations are category 2A unless otherwise indicated.  
Clinical Trials: NCCN believes that the best management of any cancer patient is in a clinical trial. Participation in clinical trials is especially encouraged.

<sup>a</sup>Data for post-cisplatin (≥50 mg/m<sup>2</sup>) emesis prevention are category 1; others are category 2A.  
<sup>b</sup>See [Emetogenic Potential of Intravenous Anticancer Agents \(AE-7\)](#).  
<sup>c</sup>Antiemetic regimens should be chosen based on the drug with the highest emetic risk as well as patient-specific risk factors.  
<sup>d</sup>See [Principles of Managing Multiday Emetogenic Chemotherapy Regimens \(AE-8\)](#).  
<sup>e</sup>Order of listed antiemetics is alphabetical.  
<sup>f</sup>Serotonin (5-HT<sub>3</sub>) antagonists may increase the risk of developing prolongation of the QT interval of the electrocardiogram. See [Discussion](#).  
<sup>g</sup>Some NCCN Member Institutions use a 5-HT<sub>3</sub> antagonist on days 2-3.  
<sup>h</sup>The FDA recommends a maximum of 16 mg for a single dose of IV ondansetron.  
<sup>i</sup>Data with palonosetron are based on randomized studies in combination with steroids only.  
<sup>j</sup>Use of steroids is contraindicated with drugs such as interleukin-2 (ie, IL-2, aldesleukin) and interferon.  
<sup>k</sup>Navari RM, Gray SE, Kerr AC. Olanzapine versus aprepitant for the prevention of chemotherapy-induced nausea and vomiting: a randomized phase III trial. *J Support Oncol* 2011;9:188-195.

Version 2.2014, 3/6/14 National Comprehensive Cancer Network, Inc. 2014. All rights reserved. The NCCN Guidelines® and this illustration may not be reproduced in any form without the express written permission of NCCN.

**AE-2**

Reproducido con la autorización de las Guías del *National Comprehensive Cancer Network®* (NCCN) para la Práctica Clínica en Oncología (Guías NCCN®) para **Antiemesis V.2.2014**. ©2014 *National Comprehensive Cancer Network, Inc.* Todos los derechos reservados. Las Guías NCCN® e ilustraciones incluidas aquí no pueden ser reproducidas de ninguna manera ni para ningún propósito sin la autorización expresa, por escrito, de NCCN. Para ver la versión más reciente y completa de las Guías NCCN®, consultar la página web [www.nccn.org](http://www.nccn.org). NATIONAL COMPREHENSIVE CANCER NETWORK®, NCCN®, GUÍAS NCCN® (NCCN GUIDELINES®), y todos los demás Contenidos NCCN (NCCN Content) son marcas en posesión del *National Comprehensive Cancer Network, Inc.*

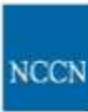

National  
Comprehensive  
Cancer  
Network\*

**NCCN Guidelines Version 2.2014**

**Antiemesis**

[NCCN Guidelines Index](#)  
[Antiemesis Table of Contents](#)  
[Discussion](#)

---

**MODERATE EMETIC RISK INTRAVENOUS CHEMOTHERAPY - EMESIS PREVENTION<sup>b,c,i</sup>**

**DAY 1**

Start before chemotherapy<sup>c,d</sup>  
5HT<sub>3</sub> antagonist + steroid ± NK1 antagonist regimen consisting of the following:

- **Serotonin (5-HT<sub>3</sub>) antagonist (category 1) (Choose one):<sup>e,f</sup>**
  - ▶ Dolasetron 100 mg PO
  - ▶ Granisetron 2 mg PO daily or 1 mg PO BID or 0.01 mg/kg (max 1 mg) IV day 1 or transdermal patch as 3.1 mg/24 h patch (containing 34.3 mg granisetron total dose) applied approximately 24 to 48 h prior to first dose of chemotherapy; maximum duration of patch is 7 days
  - ▶ Ondansetron 16-24 mg PO or 8-16 mg IV<sup>h</sup>
  - ▶ Palonosetron 0.25 mg IV (preferred)<sup>j</sup>

**AND**

- **Steroid:<sup>l</sup>**
  - ▶ Dexamethasone 12 mg PO or IV

**WITH/WITHOUT**

- Neurokinin 1 antagonist (Choose one; for selected patients, where appropriate)<sup>j</sup>
  - ▶ Aprepitant 125 mg PO
  - ▶ Fosaprepitant 150 mg IV
- ± Lorazepam 0.5-2 mg PO or IV or sublingual either every 4 or every 6 h PRN
- ± H<sub>2</sub> blocker or proton pump inhibitor

**OR**

- Olanzapine-containing regimen<sup>k</sup>
  - ▶ Olanzapine 10 mg PO
  - ▶ Palonosetron 0.25 mg IV
  - ▶ Dexamethasone 20 mg IV
- ± Lorazepam 0.5-2 mg PO or IV or sublingual either every 4 or every 6 h PRN
- ± H<sub>2</sub> blocker or proton pump inhibitor

**DAYS 2 and 3**

- **Serotonin (5-HT<sub>3</sub>) antagonist monotherapy (unless palonosetron used on Day 1) (Choose one):<sup>a,f</sup>**
  - ▶ Dolasetron 100 mg PO daily
  - ▶ Granisetron 1-2 mg PO daily or 1 mg PO BID or 0.01 mg/kg (maximum 1 mg) IV
  - ▶ Ondansetron 8 mg PO BID or 16 mg PO daily or 8-16 mg IV<sup>h</sup>
- OR**
- **Steroid monotherapy:<sup>j</sup>**
  - ▶ Dexamethasone 8 mg PO or IV daily
- OR**
- Neurokinin 1 antagonist ± steroid: (if NK-1 antagonist used on day 1)<sup>j,m</sup>
  - ▶ Aprepitant used day 1: Aprepitant 80 mg PO ± dexamethasone 8 mg PO or IV daily
  - ▶ Fosaprepitant used day 1: ± dexamethasone 8 mg PO or IV daily
- ± Lorazepam 0.5-2 mg PO or IV or sublingual either every 4 or every 6 h PRN
- ± H<sub>2</sub> blocker or proton pump inhibitor

**OR**

- Olanzapine 10 mg PO days 2-4 (if given day 1)<sup>k</sup>
- ± Lorazepam 0.5-2 mg PO or IV or sublingual either every 4 or every 6 h PRN
- ± H<sub>2</sub> blocker or proton pump inhibitor

→

→

See  
[Breakthrough Treatment \(AE-6\)](#)

See  
[Breakthrough Treatment \(AE-6\)](#)

<sup>b</sup>See [Emetogenic Potential of Intravenous Antineoplastic Agents \(AE-7\)](#).

<sup>c</sup>Antiemetic regimens should be chosen based on the drug with the highest emetic risk as well as patient-specific risk factors.

<sup>d</sup>See [Principles of Managing Multiday Emetogenic Chemotherapy Regimens \(AE-4\)](#).

<sup>e</sup>Order of listed antiemetics is alphabetical.

<sup>f</sup>Serotonin (5-HT<sub>3</sub>) antagonist may increase the risk of developing prolongation of the QT interval of the electrocardiogram. See [Discussion](#).

<sup>g</sup>The FDA recommends a maximum of 16 mg for a single dose of IV ondansetron.

<sup>h</sup>Data with palonosetron are based on randomized studies with steroids only.

<sup>i</sup>Use of steroids is contraindicated with drugs such as interleukin-2 (ie, IL-2, aldesleukin) and interferon.

<sup>j</sup>Navari RM, Gray SE, Kerr AC. Olanzapine versus aprepitant for the prevention of chemotherapy-induced nausea and vomiting: a randomized phase III trial. *J Support Oncol* 2011;9:188-195.

<sup>k</sup>Data for post-carboplatin ≥300 mg/m<sup>2</sup>, cyclophosphamide ≥800-1000 mg/m<sup>2</sup>, and doxorubicin ≥50 mg/m<sup>2</sup> emesis prevention are category 1.

<sup>m</sup>As per high emetic risk prevention, aprepitant or fosaprepitant should be added (to dexamethasone and a 5-HT<sub>3</sub> antagonist regimen) for select patients receiving other chemotherapies of moderate emetic risk (eg, carboplatin, doxorubicin, epirubicin, ifosfamide, irinotecan, methotrexate) (See [AE-2](#)).

Version 2.2014, 1/4/14 © National Comprehensive Cancer Network, Inc. 2014. All rights reserved. The NCCN Guidelines® and this illustration may not be reproduced in any form without the express written permission of NCCN.

**AE-3**

Reproducido con la autorización de las Guías del *National Comprehensive Cancer Network®* (NCNN) para la Práctica Clínica en Oncología (Guías NCNN®) para **Antiemesis V.2.2014 [61]**. ©2014 *National Comprehensive Cancer Network, Inc.* Todos los derechos reservados. Las Guías NCNN® e ilustraciones incluidas aquí no pueden ser reproducidas de ninguna manera ni para ningún propósito sin la autorización expresa, por escrito, de NCNN. Para ver la versión más reciente y completa de las Guías NCNN®, consultar la página web [www.nccn.org](http://www.nccn.org). NATIONAL COMPREHENSIVE CANCER NETWORK®, NCCN®, GUÍAS NCNN® (NCCN GUIDELINES®), y todos los demás Contenidos NCNN (NCNN Content) son marcas en posesión del *National Comprehensive Cancer Network, Inc.*

## APÉNDICE 6 PAUTAS NCCN PARA LA PRÁCTICA CLÍNICA EN ONCOLOGÍA: ANOREXIA/CAQUEXIA

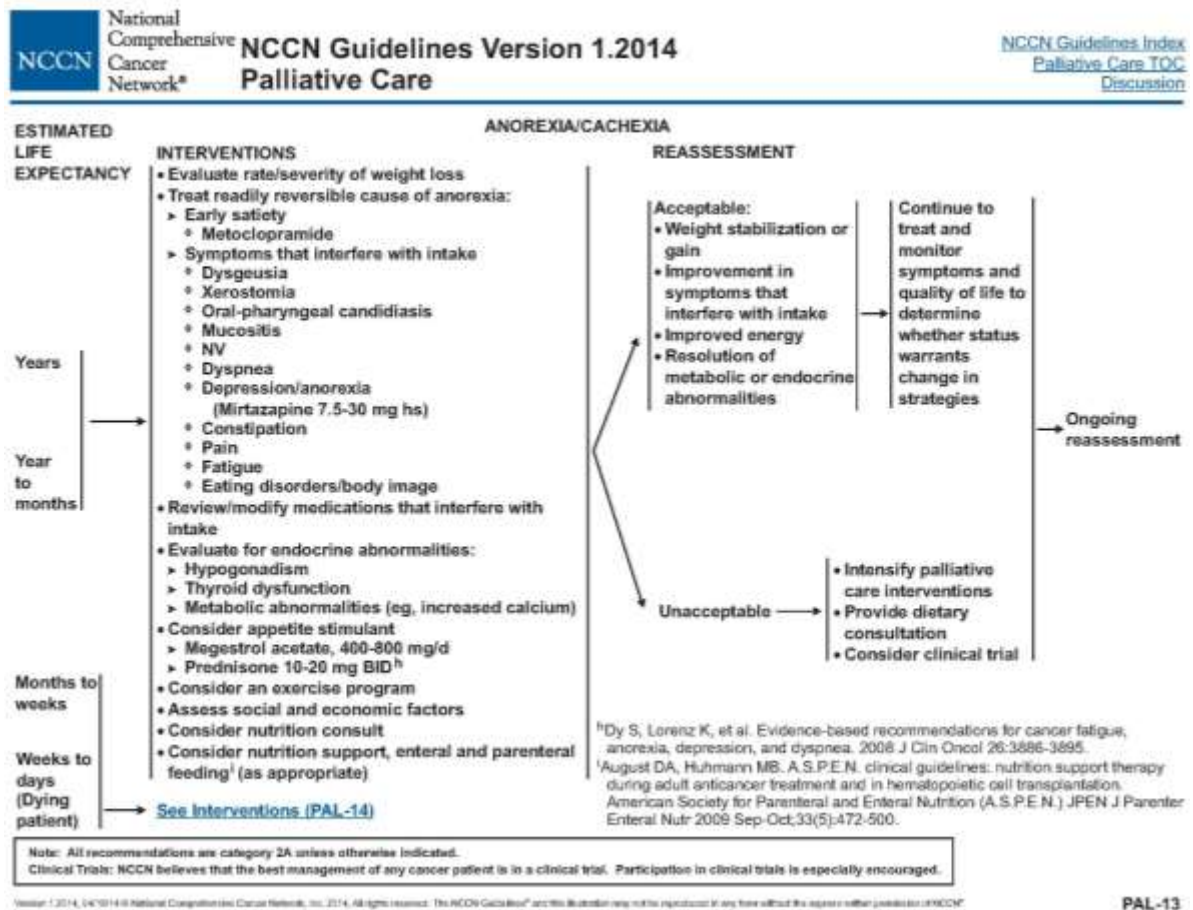

Reproducido con la autorización de las Guías del *National Comprehensive Cancer Network®* (NCCN) para la Práctica Clínica en Oncología (Guías NCCN®) para **Cuidados paliativos V.1.2014 [62]**. ©2014 *National Comprehensive Cancer Network, Inc.* Todos los derechos reservados. Las Guías NCCN® e ilustraciones incluidas aquí no pueden ser reproducidas de ninguna manera ni para ningún propósito sin la autorización expresa, por escrito, de NCCN. Para ver la versión más reciente y completa de las Guías NCCN®, consultar la página web [www.nccn.org](http://www.nccn.org). NATIONAL COMPREHENSIVE CANCER NETWORK®, NCCN®, GUÍAS NCCN® (NCCN GUIDELINES®), y todos los demás Contenidos NCCN (NCCN Content) son marcas en posesión del *National Comprehensive Cancer Network, Inc.*

## **APÉNDICE 7                      LABORATORIO    CENTRAL    PARA    MUESTRAS EXPLORATORIAS**

En este ensayo se obtendrán muestras exploratorias en diferentes momentos a lo largo de su realización, para llevar a cabo estudios complementarios de apoyo (ver la **Sección 15.7. Estudios de apoyo y exploratorios**).

De cada paciente se enviarán, al laboratorio central:

- **15 mL de médula ósea en EDTA (3 tubos de 5 mL) y**
- **5 mL de médula ósea en heparina sódica o litio (1 tubo de 5mL)**
- **20 mL de sangre periférica en EDTA (2 tubos de 10 mL)**

**Los estudios biológicos previstos en el estudio se llevarán a cabo en los siguientes momentos:**

- **En el momento de la inclusión (MO y SP)**
- **Tras el ciclo 4 de tratamiento.**
- **Cuando se alcance respuesta completa (MO y SP)**
- **Cada 6 meses en casos en RC con EMR+**
- **Anualmente en casos en RC con EMR-**
- **En el momento de la progresión (MO y SP)**

Se llevará a cabo la identificación y cuantificación de CPP mediante NGF en muestras de MO y SP en paralelo, tanto en el momento de inclusión en el estudio como cuando se alcance RC y después en función del resultado de la EMR: en los casos con enfermedad residual positiva cada 6 meses y en los casos con EMR- anualmente. El procesamiento de las muestras se realizará según las recomendaciones del grupo Euroflow en todos los momentos del estudio, tanto en las muestras de MO como en las de SP, salvo en la muestra de MO del screening en la que dado que se espera encontrar enfermedad detectable con facilidad sólo se llevará a cabo el primero de los 2 tubos del procedimiento Euroflow. Es importante recordar que dado que el protocolo de tratamiento incluye el anticuerpo monoclonal anti-CD38 Daratumumab debe emplearse marcaje tanto en superficie como citoplasmático con un anticuerpo monoclonal anti-CD38 multiepítopo.

**Todas las muestras serán identificadas mediante las etiquetas proporcionadas por PETHEMA.** Dichas etiquetas deben ser cumplimentadas apropiadamente con la siguiente información: código del

paciente, número del protocolo, estatus de la enfermedad (reclutamiento, RC, EP...), centro participante e información de contacto.

Todas las muestras se enviarán al laboratorio central a temperatura ambiente y antes de que hayan pasado 24 horas desde la extracción.

### ***Transporte e información de contacto***

**Envases:** PETHEMA proporcionará envases a todos los centros participantes en el estudio para enviar adecuadamente las muestras biológicas. De ser necesario, los centros pueden ponerse en contacto con el promotor para pedir más envases, por vía e-mail: [rocio.aguirre@pethema.es](mailto:rocio.aguirre@pethema.es) o por vía telefónica: 629 85 37 89.

**Horario:** las muestras se aceptarán de lunes a viernes (hasta las 10:00 a.m.), lo cual significa que las muestras se pueden recoger y enviar de lunes a jueves. La recogida debe estar planificada de antemano, y se debe pedir confirmación de que la entrega se realizará antes de las 10:00 a.m.

**Transporte:** está disponible, a cargo de la Fundación PETHEMA, un transporte perteneciente a la Compañía MRW. Para pedir dicho servicio se debe proporcionar la siguiente información a la compañía de transportes para organizar la recogida.

### **Información relativa al transporte:**

Agencia MRW 02620 (c/Blasco de Garay, 74. Código postal: 28015 – Madrid)

Nº de teléfono: 91 534 19 24

Fundación PETHEMA (Nº de cliente 77159)

Código del estudio: GEM- SELIBORDARA

### **Destino:**

- CIMA LAB Diagnostics – Citometría de Flujo (Laboratorio 1.07)  
EDIFICIO CIMA, Centro de Investigación Médica Aplicada  
Avda. Pío XII, 55. Código Postal: 31008 – Pamplona, Navarra  
Persona de contacto: Dr. Bruno Paiva  
Dirección e-mail: [bpaiva@unav.es](mailto:bpaiva@unav.es)  
Nº de teléfono: +34 948 194 700 Ext. 1038
- Complejo Asistencial Universitario de Salamanca  
Laboratorio de Inmunopatología  
Paseo de San Vicente, 58-182. Código Postal: 37007 – Salamanca  
Persona de contacto: Dra. Noemí Puig  
Dirección e-mail: [noemipuig@usal.es](mailto:noemipuig@usal.es)  
Nº de teléfono: 923291100 ext. 55375

- Unidad de Biología Molecular.  
Servicio de Hematología. Hospital Universitario 12 de Octubre  
Centro de Actividades Ambulatorias, 6ª planta bloque D  
Avda. de Córdoba s/n. Código Postal: 28041 - Madrid  
Personas de contacto: Dr. Joaquín Martínez López / Dra. Teresa Cedena  
Direcciones e-mail: [jmarti01@med.ucm.es](mailto:jmarti01@med.ucm.es)/ [mariateresa.cedena@salud.madrid.org](mailto:mariateresa.cedena@salud.madrid.org)  
Nº de teléfono: 91 779 27 87 / 91 779 23 03.

Los criterios elegidos para la selección del laboratorio al que cada centro debe enviar las muestras que éstos recojan se han basado en la proximidad geográfica y equidad en términos de volumen de muestras, y son como sigue:

| CENTRO                               | Laboratorio receptor de muestras                                                    |
|--------------------------------------|-------------------------------------------------------------------------------------|
| Clinica Universidad de Navarra       | CIMA LAB Diagnostics (Navarra)                                                      |
| Hospital Universitario de Salamanca  | Complejo Asistencial Universitario de Salamanca.<br>Laboratorio de Inmunopatología. |
| Hospital Universitario 12 de Octubre | Hospital Universitario 12 de Octubre.<br>Unidad de Biología Molecular.              |
| Hospital Clinic de Barcelona         | Complejo Asistencial Universitario de Salamanca.<br>Laboratorio de Inmunopatología. |
| Hospital Germans trias i Pujol       | Complejo Asistencial Universitario de Salamanca.<br>Laboratorio de Inmunopatología. |
| Hospital Dr. Peset                   | Complejo Asistencial Universitario de Salamanca.<br>Laboratorio de Inmunopatología. |
| Hospital Central de Asturias         | CIMA LAB Diagnostics (Navarra)                                                      |
| Hospital Universitario de Santiago   | CIMA LAB Diagnostics (Navarra)                                                      |
| Hospital Virgen del Rocio            | CIMA LAB Diagnostics (Navarra)                                                      |
| Hospital Morales Meseguer            | Complejo Asistencial Universitario de Salamanca.<br>Laboratorio de Inmunopatología. |

|                                                |                                                                                     |
|------------------------------------------------|-------------------------------------------------------------------------------------|
| Hospital Clinico de Madrid                     | Hospital Universitario 12 de Octubre.<br>Unidad de Biología Molecular.              |
| Instituto Catalán de Oncología de Girona       | Complejo Asistencial Universitario de Salamanca.<br>Laboratorio de Inmunopatología. |
| Instituto Catalán de Oncología de L'hospitalet | Complejo Asistencial Universitario de Salamanca.<br>Laboratorio de Inmunopatología. |
| Hospital Universitario de Canarias             | Complejo Asistencial Universitario de Salamanca.<br>Laboratorio de Inmunopatología. |
| Hospital de Donostia                           | CIMA LAB Diagnostics (Navarra)                                                      |

## APÉNDICE 8 CRITERIOS NHLBI DE CLASIFICACIÓN DE LA SEVERIDAD DEL ASMA

| Componentes de severidad                                                                                                                                                                                                                         | Intermitente                                              | Persistente – Suave                                                         | Persistente – Moderada                               | Persistente – Severa         |
|--------------------------------------------------------------------------------------------------------------------------------------------------------------------------------------------------------------------------------------------------|-----------------------------------------------------------|-----------------------------------------------------------------------------|------------------------------------------------------|------------------------------|
| Empeoramiento: síntomas                                                                                                                                                                                                                          | 2 días a la semana o menos                                | más de 2 días a la semana pero no diariamente                               | diariamente                                          | a lo largo de todo el día    |
| Empeoramiento: despertares nocturnos                                                                                                                                                                                                             | 2 veces al mes o menos                                    | 3 o 4 veces al mes                                                          | más de una vez a la semana, pero no todas las noches | a menudo 7 veces a la semana |
| Empeoramiento: uso de agonistas $\beta_2$ de acción corta para el control de los síntomas (no para prevenir broncoespasmos inducidos por el ejercicio)                                                                                           | 2 días a la semana o menos                                | más de 2 días a la semana pero no diariamente y nunca más de una vez al día | diariamente                                          | varias veces al día          |
| Empeoramiento: interferencia con la actividad normal                                                                                                                                                                                             | ninguna                                                   | limitaciones menores                                                        | alguna limitación                                    | extremadamente limitado      |
| Empeoramiento: función pulmonar: FEV <sub>1</sub> (volumen espiratorio forzado en el primer segundo [porcentaje predicho])                                                                                                                       | más del 80%; FEV <sub>1</sub> normal entre exacerbaciones | más del 80%                                                                 | 60-80%                                               | menos del 60%                |
| Empeoramiento: FEV <sub>1</sub> /FVC<br>FEV <sub>1</sub> /FVC normal (volumen espiratorio forzado en el primer segundo dividido por capacidad vital forzada) por edad: 8 a 19 años, 85%; 20 a 39 años, 80%; 40 a 59 años, 75%; 60 a 80 años, 70% | normal                                                    | normal                                                                      | reducido un 5%                                       | reducido más del 5%          |
| Riesgo: exacerbaciones del asma que requieran corticosteroides sistémicos orales                                                                                                                                                                 | De 0 a 1 al año                                           | 2 o más al año                                                              | 2 o más al año                                       | 2 o más al año               |

## APÉNDICE 9 REVISIÓN INTERNACIONAL DE CRITERIOS DE DIAGNÓSTICO DEL MIELOMA MÚLTIPLE

(Referencia: International Myeloma Working Group updated criteria for the diagnosis of multiple myeloma Rajkumar, S Vincent et al. The Lancet Oncology 2014 , Volume 15 , Issue 12 , e538 - e548)

### Panel: Revised International Myeloma Working Group diagnostic criteria for multiple myeloma and smouldering multiple myeloma

#### Definition of multiple myeloma

Clonal bone marrow plasma cells  $\geq 10\%$  or biopsy-proven bony or extramedullary plasmacytoma\* and any one or more of the following myeloma defining events:

- Myeloma defining events:
  - Evidence of end organ damage that can be attributed to the underlying plasma cell proliferative disorder, specifically:
    - Hypercalcaemia: serum calcium  $>0.25$  mmol/L ( $>1$  mg/dL) higher than the upper limit of normal or  $>2.75$  mmol/L ( $>11$  mg/dL)
    - Renal insufficiency: creatinine clearance  $<40$  mL per min<sup>†</sup> or serum creatinine  $>177$   $\mu$ mol/L ( $>2$  mg/dL)
    - Anaemia: haemoglobin value of  $>20$  g/L below the lower limit of normal, or a haemoglobin value  $<100$  g/L
    - Bone lesions: one or more osteolytic lesions on skeletal radiography, CT, or PET-CT<sup>‡</sup>
  - Any one or more of the following biomarkers of malignancy:
    - Clonal bone marrow plasma cell percentage\*  $\geq 60\%$
    - Involved:uninvolved serum free light chain ratio $\S \geq 100$
    - $>1$  focal lesions on MRI studies $\P$

#### Definition of smouldering multiple myeloma

Both criteria must be met:

- Serum monoclonal protein (IgG or IgA)  $\geq 30$  g/L or urinary monoclonal protein  $\geq 500$  mg per 24 h and/or clonal bone marrow plasma cells 10–60%
- Absence of myeloma defining events or amyloidosis

PET-CT=<sup>18</sup>F-fluorodeoxyglucose PET with CT. \*Clonality should be established by showing  $\kappa/\lambda$ -light-chain restriction on flow cytometry, immunohistochemistry, or immunofluorescence. Bone marrow plasma cell percentage should preferably be estimated from a core biopsy specimen; in case of a disparity between the aspirate and core biopsy, the highest value should be used. <sup>†</sup>Measured or estimated by validated equations. <sup>‡</sup>If bone marrow has less than 10% clonal plasma cells, more than one bone lesion is required to distinguish from solitary plasmacytoma with minimal marrow involvement. <sup>§</sup>These values are based on the serum Freelite assay (The Binding Site Group, Birmingham, UK). The involved free light chain must be  $\geq 100$  mg/L. <sup>¶</sup>Each focal lesion must be 5 mm or more in size.
